# Supplementary material
Source: publisher figshare collection journal article supplement (https://acs.figshare.com/ndownloader/files/5134597)
Supplement: Supplementary file 1 [file 5134597]

#===============================================================================
 data_global
#===============================================================================
_audit_creation_date               11-24-2004

# 1. SUBMISSION DETAILS

_publ_contact_author_name        'Louis Ricard'
_publ_contact_author_address     
;Laboratoire DCPH
Ecole Polytechnique
Route de Saclay
F91128 Palaiseau
France
;
_publ_contact_author_email       louis.ricard@polytechnique.fr
_publ_contact_author_phone       330169334572
_publ_contact_author_fax         330169333990

_publ_contact_letter
;
     Please consider this CIF submission for publication as a new structure
     paper in Organometallics. The figures, chemical
     structure diagram (scheme), Transfert of Copyright Agreement form and
     structure factors will be sent on receipt of your acknowledgement letter
;
#===============================================================================

# 2. PROCESSING SUMMARY (IUCr Office Use Only)

_journal_date_recd_electronic     ?

_journal_date_to_coeditor         ?
_journal_date_from_coeditor       ?
_journal_date_accepted            ?

_journal_date_printers_first      ?
_journal_date_printers_final      ?
_journal_date_proofs_out          ?
_journal_date_proofs_in           ?


_journal_coeditor_name            ?
_journal_coeditor_code            ?
_journal_coeditor_notes
; ?
;

_journal_techeditor_code          ?
_journal_techeditor_notes
; ?
;

_journal_coden_ASTM               ?
_journal_name_full                ?
_journal_year                     ?
_journal_volume                   ?

_journal_issue                    ?
_journal_page_first               ?
_journal_page_last                ?

_journal_suppl_publ_number        ?
_journal_suppl_publ_pages         ?

#===============================================================================

# 3. TITLE AND AUTHOR LIST

_publ_section_title
;
 Synthesis of Mixed PN Bidentate Ligands and their Coordination to
 Group 10 Metal Centers.
;
# The loop structure below should contain the names  and addresses of all
# authors, in the required order  of publication. Repeat as necessary.


loop_
_publ_author_name
;
L. Boubekeur
L. Ricard 
N. Mezailles
P. Le Floch
;
_publ_author_address
;
Laboratoire Heteroelements et Coordination, 
CNRS UMR 7653,
DCPH Ecole Polytechnique,
F-91128 Palaiseau Cedex
France
;

#===============================================================================
# 4. TEXT

_publ_section_abstract
; ?
;

_publ_section_comment
; 
;
_publ_section_exptl_prep
;All structures were solved using SIR97 (Altomare et al.) and refined with 
 SHELXL97 (Sheldrick). Figures were drawn with Platon (Spek, 1990). 
;

_publ_section_references
;Altomare, A., Cascarano, G., Giacovazzo, C. & Guagliardi, A.
 (1993) J. Appl. Cryst. 26, 343-350.

 Sheldrick, G.M. SHELXL97. Program for crystal structure
 refinement. University of G\\"ottingen, Germany, 1997.

 Sluis, P. v.d., Spek, A.L. (1990). Acta Cryst. A46, 194-201.

 Spek, A.L. (1990). Acta Cryst. A46, C-34.
;


_publ_section_figure_captions
; ?
;

_publ_section_acknowledgements
; ?
;


#===============================================================================
 # If more than one structure is reported, sections 5-10 should be filled in
 # per structure. For each data set, replace the ? in the data_? line below
 # by a unique identifier.


#===============================================================================
data_pdcl2bensiminop 
# compound 5e
 
_audit_creation_method            SHELXL-97 
_chemical_name_systematic 
; 
 ? 
; 
_chemical_name_common             ? 
_chemical_melting_point           ? 
_chemical_formula_moiety          ? 
_chemical_formula_sum 
 'C33 H31 Cl2 N P2 Pd' 
_chemical_formula_weight          680.83 
 
loop_ 
 _atom_type_symbol 
 _atom_type_description 
 _atom_type_scat_dispersion_real 
 _atom_type_scat_dispersion_imag 
 _atom_type_scat_source 
 'C'  'C'   0.0033   0.0016 
 'International Tables Vol C Tables 4.2.6.8 and 6.1.1.4' 
 'H'  'H'   0.0000   0.0000 
 'International Tables Vol C Tables 4.2.6.8 and 6.1.1.4' 
 'N'  'N'   0.0061   0.0033 
 'International Tables Vol C Tables 4.2.6.8 and 6.1.1.4' 
 'P'  'P'   0.1023   0.0942 
 'International Tables Vol C Tables 4.2.6.8 and 6.1.1.4' 
 'Cl'  'Cl'   0.1484   0.1585 
 'International Tables Vol C Tables 4.2.6.8 and 6.1.1.4' 
 'Pd'  'Pd'  -0.9988   1.0072 
 'International Tables Vol C Tables 4.2.6.8 and 6.1.1.4' 
 
_symmetry_cell_setting            'Orthorhombic'
_symmetry_space_group_name_H-M    'P212121     '
 
loop_ 
 _symmetry_equiv_pos_as_xyz 
 'x, y, z' 
 '-x+1/2, -y, z+1/2' 
 'x+1/2, -y+1/2, -z' 
 '-x, y+1/2, -z+1/2' 
 
_cell_length_a                    12.3350(10) 
_cell_length_b                    13.6480(10) 
_cell_length_c                    17.6430(10) 
_cell_angle_alpha                 90.00 
_cell_angle_beta                  90.00 
_cell_angle_gamma                 90.00 
_cell_volume                      2970.2(4) 
_cell_formula_units_Z             4 
_cell_measurement_temperature     150.0(1)
_cell_measurement_reflns_used     251
_cell_measurement_theta_min       3.0
_cell_measurement_theta_max       20.0
 
_exptl_crystal_description        'plate'
_exptl_crystal_colour             'orange'
_exptl_crystal_size_max           0.20 
_exptl_crystal_size_mid           0.16 
_exptl_crystal_size_min           0.05 
_exptl_crystal_density_meas       ? 
_exptl_crystal_density_diffrn     1.523 
_exptl_crystal_density_method     'not measured' 
_exptl_crystal_F_000              1384 
_exptl_absorpt_coefficient_mu     0.937 
_exptl_absorpt_correction_type    'multi-scan'
_exptl_absorpt_correction_T_min   0.8348 
_exptl_absorpt_correction_T_max   0.9547 
_exptl_absorpt_process_details    ? 
 
_exptl_special_details 
; 
 ? 
; 
 
_diffrn_ambient_temperature       150.0(1)
_diffrn_radiation_wavelength      0.71069 
_diffrn_radiation_type            MoK\a 
_diffrn_radiation_source          'fine-focus sealed tube' 
_diffrn_radiation_monochromator   graphite 
_diffrn_measurement_device_type   'KappaCCD'
_diffrn_measurement_method        'phi and omega scans'
_diffrn_detector_area_resol_mean  ? 
_diffrn_standards_number          ? 
_diffrn_standards_interval_count  ? 
_diffrn_standards_interval_time   ? 
_diffrn_standards_decay_%         ? 
_diffrn_reflns_number             8575 
_diffrn_reflns_av_R_equivalents   0.0000 
_diffrn_reflns_av_sigmaI/netI     0.0496 
_diffrn_reflns_limit_h_min        -17 
_diffrn_reflns_limit_h_max        17 
_diffrn_reflns_limit_k_min        -19 
_diffrn_reflns_limit_k_max        19 
_diffrn_reflns_limit_l_min        -24 
_diffrn_reflns_limit_l_max        24 
_diffrn_reflns_theta_min          3.20 
_diffrn_reflns_theta_max          30.02 
_reflns_number_total              8575 
_reflns_number_gt                 7398 
_reflns_threshold_expression      >2sigma(I) 
 
_computing_data_collection        ? 
_computing_cell_refinement        ? 
_computing_data_reduction         ? 
_computing_structure_solution     'SHELXS-97 (Sheldrick, 1990)' 
_computing_structure_refinement   'SHELXL-97 (Sheldrick, 1997)' 
_computing_molecular_graphics     ? 
_computing_publication_material   ? 
 
_refine_special_details 
; 
 Refinement of F^2^ against ALL reflections.  The weighted R-factor wR and 
 goodness of fit S are based on F^2^, conventional R-factors R are based 
 on F, with F set to zero for negative F^2^. The threshold expression of 
 F^2^ > 2sigma(F^2^) is used only for calculating R-factors(gt) etc. and is 
 not relevant to the choice of reflections for refinement.  R-factors based 
 on F^2^ are statistically about twice as large as those based on F, and R- 
 factors based on ALL data will be even larger. 
; 
 
_refine_ls_structure_factor_coef  Fsqd  
_refine_ls_matrix_type            full 
_refine_ls_weighting_scheme       calc  
_refine_ls_weighting_details 
 'calc w=1/[\s^2^(Fo^2^)+(0.0427P)^2^+0.0000P] where P=(Fo^2^+2Fc^2^)/3' 
_atom_sites_solution_primary      direct 
_atom_sites_solution_secondary    difmap 
_atom_sites_solution_hydrogens    geom 
_refine_ls_hydrogen_treatment     mixed 
_refine_ls_extinction_method      SHELXL 
_refine_ls_extinction_coef        0.0026(3) 
_refine_ls_extinction_expression 
 'Fc^*^=kFc[1+0.001xFc^2^\l^3^/sin(2\q)]^-1/4^' 
_refine_ls_abs_structure_details 
 'Flack H D (1983), Acta Cryst. A39, 876-881' 
_refine_ls_abs_structure_Flack    -0.022(19) 
_refine_ls_number_reflns          8575 
_refine_ls_number_parameters      354 
_refine_ls_number_restraints      0 
_refine_ls_R_factor_all           0.0446 
_refine_ls_R_factor_gt            0.0337 
_refine_ls_wR_factor_ref          0.0819 
_refine_ls_wR_factor_gt           0.0772 
_refine_ls_goodness_of_fit_ref    1.008 
_refine_ls_restrained_S_all       1.008 
_refine_ls_shift/su_max           0.001 
_refine_ls_shift/su_mean          0.000 
 
loop_ 
 _atom_site_label 
 _atom_site_type_symbol 
 _atom_site_fract_x 
 _atom_site_fract_y 
 _atom_site_fract_z 
 _atom_site_U_iso_or_equiv 
 _atom_site_adp_type 
 _atom_site_occupancy 
 _atom_site_symmetry_multiplicity 
 _atom_site_calc_flag 
 _atom_site_refinement_flags 
 _atom_site_disorder_assembly 
 _atom_site_disorder_group 
Pd1 Pd 0.316643(14) 0.003167(15) 0.224632(10) 0.02019(6) Uani 1 1 d . . . 
Cl1 Cl 0.49928(4) -0.00167(5) 0.19193(3) 0.02351(12) Uani 1 1 d . . . 
Cl2 Cl 0.26796(6) -0.01554(6) 0.09557(4) 0.03063(16) Uani 1 1 d . . . 
P1 P 0.14427(6) -0.05577(5) 0.33334(4) 0.02061(14) Uani 1 1 d . . . 
P2 P 0.36483(5) 0.00894(5) 0.34711(3) 0.02045(13) Uani 1 1 d . . . 
N9 N 0.15347(17) 0.00771(16) 0.25728(11) 0.0219(4) Uani 1 1 d . . . 
C1 C 0.23968(19) -0.0082(2) 0.40166(13) 0.0228(5) Uani 1 1 d . . . 
H1A H 0.2509 -0.0553 0.4436 0.027 Uiso 1 1 calc R . . 
H1B H 0.2140 0.0548 0.4229 0.027 Uiso 1 1 calc R . . 
C2 C 0.0122(2) -0.05372(18) 0.37730(15) 0.0230(5) Uani 1 1 d . . . 
C3 C 0.0023(2) -0.02626(19) 0.45334(16) 0.0281(6) Uani 1 1 d . . . 
H3 H 0.0651 -0.0105 0.4821 0.034 Uiso 1 1 calc R . . 
C4 C -0.0995(2) -0.0220(2) 0.48678(17) 0.0339(7) Uani 1 1 d . . . 
H4 H -0.1064 -0.0038 0.5385 0.041 Uiso 1 1 calc R . . 
C5 C -0.1909(3) -0.0443(2) 0.44475(18) 0.0363(7) Uani 1 1 d . . . 
H5 H -0.2608 -0.0392 0.4671 0.044 Uiso 1 1 calc R . . 
C6 C -0.1806(3) -0.0740(2) 0.37042(18) 0.0355(7) Uani 1 1 d . . . 
H6 H -0.2435 -0.0909 0.3422 0.043 Uiso 1 1 calc R . . 
C7 C -0.0799(2) -0.0793(2) 0.33658(17) 0.0297(6) Uani 1 1 d . . . 
H7 H -0.0736 -0.1005 0.2855 0.036 Uiso 1 1 calc R . . 
C8 C 0.1810(2) -0.18018(18) 0.31163(15) 0.0221(5) Uani 1 1 d . . . 
C9 C 0.1673(2) -0.21477(19) 0.23809(17) 0.0267(6) Uani 1 1 d . . . 
H9 H 0.1395 -0.1728 0.1997 0.032 Uiso 1 1 calc R . . 
C10 C 0.1945(3) -0.3114(2) 0.22106(18) 0.0333(7) Uani 1 1 d . . . 
H10 H 0.1851 -0.3354 0.1710 0.040 Uiso 1 1 calc R . . 
C11 C 0.2351(2) -0.3722(2) 0.2767(2) 0.0354(7) Uani 1 1 d . . . 
H11 H 0.2541 -0.4379 0.2647 0.042 Uiso 1 1 calc R . . 
C12 C 0.2483(3) -0.3376(2) 0.3498(2) 0.0348(8) Uani 1 1 d . . . 
H12 H 0.2761 -0.3799 0.3880 0.042 Uiso 1 1 calc R . . 
C13 C 0.2213(2) -0.2419(2) 0.36788(17) 0.0280(6) Uani 1 1 d . . . 
H13 H 0.2301 -0.2185 0.4182 0.034 Uiso 1 1 calc R . . 
C14 C 0.4494(2) -0.09139(19) 0.37933(16) 0.0234(6) Uani 1 1 d . . . 
C15 C 0.4735(2) -0.1701(2) 0.33202(17) 0.0270(6) Uani 1 1 d . . . 
H15 H 0.4509 -0.1691 0.2805 0.032 Uiso 1 1 calc R . . 
C16 C 0.5301(3) -0.2496(2) 0.35989(19) 0.0330(7) Uani 1 1 d . . . 
H16 H 0.5458 -0.3035 0.3277 0.040 Uiso 1 1 calc R . . 
C17 C 0.5635(3) -0.2509(2) 0.4333(2) 0.0391(8) Uani 1 1 d . . . 
H17 H 0.6027 -0.3058 0.4519 0.047 Uiso 1 1 calc R . . 
C18 C 0.5410(3) -0.1736(2) 0.4813(2) 0.0436(8) Uani 1 1 d . . . 
H18 H 0.5648 -0.1755 0.5325 0.052 Uiso 1 1 calc R . . 
C19 C 0.4839(3) -0.0933(2) 0.45495(17) 0.0342(7) Uani 1 1 d . . . 
H19 H 0.4682 -0.0400 0.4878 0.041 Uiso 1 1 calc R . . 
C20 C 0.4249(2) 0.12020(18) 0.38547(16) 0.0220(6) Uani 1 1 d . . . 
C21 C 0.5156(2) 0.1605(2) 0.34953(16) 0.0280(6) Uani 1 1 d . . . 
H21 H 0.5457 0.1289 0.3064 0.034 Uiso 1 1 calc R . . 
C22 C 0.5614(3) 0.2453(2) 0.37605(18) 0.0316(7) Uani 1 1 d . . . 
H22 H 0.6227 0.2722 0.3510 0.038 Uiso 1 1 calc R . . 
C23 C 0.5192(3) 0.2917(2) 0.43875(17) 0.0321(7) Uani 1 1 d . . . 
H23 H 0.5510 0.3506 0.4568 0.038 Uiso 1 1 calc R . . 
C24 C 0.4302(3) 0.2520(2) 0.47523(17) 0.0323(7) Uani 1 1 d . . . 
H24 H 0.4013 0.2836 0.5188 0.039 Uiso 1 1 calc R . . 
C25 C 0.3828(2) 0.1666(2) 0.44882(15) 0.0287(6) Uani 1 1 d . . . 
H25 H 0.3216 0.1399 0.4741 0.034 Uiso 1 1 calc R . . 
C26 C 0.0885(2) 0.10005(18) 0.25008(16) 0.0241(6) Uani 1 1 d . . . 
H26 H 0.0181 0.0879 0.2766 0.029 Uiso 1 1 calc R . . 
C27 C 0.0614(3) 0.1204(2) 0.16823(17) 0.0323(7) Uani 1 1 d . . . 
H27A H 0.1284 0.1325 0.1399 0.048 Uiso 1 1 calc R . . 
H27B H 0.0145 0.1782 0.1651 0.048 Uiso 1 1 calc R . . 
H27C H 0.0238 0.0637 0.1465 0.048 Uiso 1 1 calc R . . 
C28 C 0.1405(2) 0.18823(18) 0.28883(16) 0.0246(6) Uani 1 1 d . . . 
C29 C 0.2340(2) 0.2315(2) 0.26103(17) 0.0289(6) Uani 1 1 d . . . 
H29 H 0.2679 0.2050 0.2172 0.035 Uiso 1 1 calc R . . 
C30 C 0.2788(3) 0.3126(2) 0.29606(19) 0.0349(7) Uani 1 1 d . . . 
H30 H 0.3441 0.3402 0.2771 0.042 Uiso 1 1 calc R . . 
C31 C 0.2291(3) 0.3534(2) 0.35828(19) 0.0382(8) Uani 1 1 d . . . 
H31 H 0.2588 0.4103 0.3813 0.046 Uiso 1 1 calc R . . 
C32 C 0.1355(3) 0.3114(2) 0.38754(18) 0.0400(8) Uani 1 1 d . . . 
H32 H 0.1014 0.3391 0.4308 0.048 Uiso 1 1 calc R . . 
C33 C 0.0920(3) 0.2287(2) 0.35327(17) 0.0322(7) Uani 1 1 d . . . 
H33 H 0.0286 0.1993 0.3738 0.039 Uiso 1 1 calc R . . 
 
loop_ 
 _atom_site_aniso_label 
 _atom_site_aniso_U_11 
 _atom_site_aniso_U_22 
 _atom_site_aniso_U_33 
 _atom_site_aniso_U_23 
 _atom_site_aniso_U_13 
 _atom_site_aniso_U_12 
Pd1 0.02082(10) 0.02287(9) 0.01689(9) 0.00026(9) 0.00107(7) 0.00018(9) 
Cl1 0.0208(3) 0.0254(3) 0.0243(3) -0.0005(3) 0.0052(2) 0.0001(3) 
Cl2 0.0307(3) 0.0445(4) 0.0167(3) -0.0018(3) -0.0003(3) 0.0062(3) 
P1 0.0197(3) 0.0233(3) 0.0188(3) -0.0010(3) 0.0000(3) -0.0017(2) 
P2 0.0199(3) 0.0226(3) 0.0189(3) -0.0002(3) 0.0009(2) -0.0011(3) 
N9 0.0198(9) 0.0249(10) 0.0212(9) 0.0013(10) 0.0024(8) 0.0014(9) 
C1 0.0228(12) 0.0267(12) 0.0191(11) -0.0009(12) 0.0015(9) -0.0010(12) 
C2 0.0213(13) 0.0243(12) 0.0234(13) 0.0002(10) 0.0011(11) -0.0029(10) 
C3 0.0261(14) 0.0324(14) 0.0257(14) -0.0023(11) 0.0015(12) -0.0020(10) 
C4 0.0301(15) 0.0439(18) 0.0275(14) -0.0066(12) 0.0112(12) -0.0037(12) 
C5 0.0259(15) 0.0469(17) 0.0360(17) -0.0051(14) 0.0068(14) -0.0051(14) 
C6 0.0264(16) 0.0468(16) 0.0332(16) -0.0030(13) 0.0016(14) -0.0083(14) 
C7 0.0237(15) 0.0393(15) 0.0260(15) -0.0025(13) 0.0006(13) -0.0043(12) 
C8 0.0187(13) 0.0232(11) 0.0244(14) 0.0004(10) 0.0003(12) -0.0038(11) 
C9 0.0247(16) 0.0291(13) 0.0263(15) -0.0008(11) 0.0014(12) -0.0023(10) 
C10 0.0315(16) 0.0331(14) 0.0354(17) -0.0086(13) 0.0052(15) -0.0034(12) 
C11 0.0295(16) 0.0249(12) 0.052(2) 0.0011(14) 0.0066(16) -0.0007(11) 
C12 0.0319(18) 0.0275(14) 0.045(2) 0.0076(13) -0.0041(16) 0.0008(12) 
C13 0.0294(16) 0.0298(13) 0.0248(14) 0.0042(12) -0.0006(12) -0.0033(12) 
C14 0.0223(14) 0.0260(12) 0.0218(14) 0.0004(11) 0.0009(12) 0.0001(11) 
C15 0.0255(15) 0.0275(13) 0.0279(15) -0.0006(12) 0.0007(13) 0.0006(11) 
C16 0.0326(18) 0.0246(13) 0.0418(18) -0.0032(13) 0.0085(15) 0.0020(12) 
C17 0.0341(19) 0.0380(16) 0.045(2) 0.0118(15) 0.0045(16) 0.0107(14) 
C18 0.045(2) 0.053(2) 0.0325(17) 0.0086(15) -0.0065(16) 0.0157(17) 
C19 0.0371(18) 0.0382(15) 0.0274(15) -0.0010(13) -0.0029(14) 0.0126(13) 
C20 0.0227(15) 0.0225(11) 0.0207(14) -0.0022(10) -0.0037(11) -0.0015(10) 
C21 0.0284(16) 0.0316(14) 0.0239(15) -0.0022(11) 0.0028(13) -0.0023(12) 
C22 0.0335(19) 0.0289(14) 0.0323(17) -0.0012(13) 0.0034(14) -0.0076(12) 
C23 0.0381(19) 0.0268(13) 0.0313(16) -0.0004(12) -0.0063(14) -0.0039(12) 
C24 0.0338(18) 0.0337(14) 0.0294(16) -0.0081(13) -0.0019(14) -0.0012(12) 
C25 0.0288(16) 0.0334(14) 0.0238(14) -0.0022(11) 0.0004(13) -0.0036(12) 
C26 0.0213(13) 0.0260(12) 0.0249(14) -0.0006(11) -0.0006(11) 0.0022(10) 
C27 0.0307(17) 0.0352(15) 0.0310(16) 0.0000(13) -0.0057(14) 0.0056(12) 
C28 0.0218(14) 0.0253(12) 0.0265(15) 0.0044(11) 0.0014(12) 0.0044(11) 
C29 0.0259(15) 0.0290(13) 0.0318(16) 0.0045(11) 0.0016(13) 0.0034(11) 
C30 0.0279(16) 0.0308(14) 0.0458(19) 0.0090(14) -0.0049(15) -0.0028(12) 
C31 0.048(2) 0.0297(14) 0.0368(18) -0.0002(13) -0.0130(17) -0.0064(14) 
C32 0.049(2) 0.0358(16) 0.0353(17) -0.0085(14) 0.0040(17) -0.0010(15) 
C33 0.0342(17) 0.0323(15) 0.0300(16) -0.0015(12) 0.0051(14) -0.0040(12) 
 
_geom_special_details 
; 
 All esds (except the esd in the dihedral angle between two l.s. planes) 
 are estimated using the full covariance matrix.  The cell esds are taken 
 into account individually in the estimation of esds in distances, angles 
 and torsion angles; correlations between esds in cell parameters are only 
 used when they are defined by crystal symmetry.  An approximate (isotropic) 
 treatment of cell esds is used for estimating esds involving l.s. planes. 
; 
 
loop_ 
 _geom_bond_atom_site_label_1 
 _geom_bond_atom_site_label_2 
 _geom_bond_distance 
 _geom_bond_site_symmetry_2 
 _geom_bond_publ_flag 
Pd1 N9 2.094(2) . ? 
Pd1 P2 2.2425(6) . ? 
Pd1 Cl1 2.3265(6) . ? 
Pd1 Cl2 2.3687(7) . ? 
Pd1 P1 2.9742(7) . ? 
P1 N9 1.601(2) . ? 
P1 C8 1.799(3) . ? 
P1 C2 1.805(3) . ? 
P1 C1 1.805(3) . ? 
P2 C14 1.813(3) . ? 
P2 C20 1.820(3) . ? 
P2 C1 1.834(2) . ? 
N9 C26 1.499(3) . ? 
C2 C7 1.388(4) . ? 
C2 C3 1.398(4) . ? 
C3 C4 1.389(4) . ? 
C4 C5 1.383(4) . ? 
C5 C6 1.379(4) . ? 
C6 C7 1.380(4) . ? 
C8 C9 1.391(4) . ? 
C8 C13 1.393(4) . ? 
C9 C10 1.393(4) . ? 
C10 C11 1.379(4) . ? 
C11 C12 1.384(5) . ? 
C12 C13 1.385(4) . ? 
C14 C15 1.392(4) . ? 
C14 C19 1.401(4) . ? 
C15 C16 1.381(4) . ? 
C16 C17 1.360(5) . ? 
C17 C18 1.382(5) . ? 
C18 C19 1.383(4) . ? 
C20 C25 1.385(4) . ? 
C20 C21 1.399(4) . ? 
C21 C22 1.369(4) . ? 
C22 C23 1.377(4) . ? 
C23 C24 1.383(4) . ? 
C24 C25 1.385(4) . ? 
C26 C27 1.508(4) . ? 
C26 C28 1.525(4) . ? 
C28 C29 1.386(4) . ? 
C28 C33 1.398(4) . ? 
C29 C30 1.383(4) . ? 
C30 C31 1.375(5) . ? 
C31 C32 1.388(5) . ? 
C32 C33 1.388(4) . ? 
 
loop_ 
 _geom_angle_atom_site_label_1 
 _geom_angle_atom_site_label_2 
 _geom_angle_atom_site_label_3 
 _geom_angle 
 _geom_angle_site_symmetry_1 
 _geom_angle_site_symmetry_3 
 _geom_angle_publ_flag 
N9 Pd1 P2 89.35(6) . . ? 
N9 Pd1 Cl1 178.39(6) . . ? 
P2 Pd1 Cl1 89.04(2) . . ? 
N9 Pd1 Cl2 91.37(6) . . ? 
P2 Pd1 Cl2 175.78(3) . . ? 
Cl1 Pd1 Cl2 90.23(2) . . ? 
N9 Pd1 P1 31.10(6) . . ? 
P2 Pd1 P1 65.02(2) . . ? 
Cl1 Pd1 P1 147.62(2) . . ? 
Cl2 Pd1 P1 114.17(2) . . ? 
N9 P1 C8 108.33(12) . . ? 
N9 P1 C2 114.56(12) . . ? 
C8 P1 C2 109.49(12) . . ? 
N9 P1 C1 108.59(12) . . ? 
C8 P1 C1 108.51(13) . . ? 
C2 P1 C1 107.22(12) . . ? 
N9 P1 Pd1 42.49(8) . . ? 
C8 P1 Pd1 86.43(9) . . ? 
C2 P1 Pd1 156.68(9) . . ? 
C1 P1 Pd1 82.37(8) . . ? 
C14 P2 C20 106.22(13) . . ? 
C14 P2 C1 102.92(13) . . ? 
C20 P2 C1 104.70(13) . . ? 
C14 P2 Pd1 115.35(9) . . ? 
C20 P2 Pd1 119.71(9) . . ? 
C1 P2 Pd1 106.14(8) . . ? 
C26 N9 P1 119.21(17) . . ? 
C26 N9 Pd1 121.03(16) . . ? 
P1 N9 Pd1 106.41(11) . . ? 
P1 C1 P2 104.14(12) . . ? 
C7 C2 C3 119.5(3) . . ? 
C7 C2 P1 120.8(2) . . ? 
C3 C2 P1 119.7(2) . . ? 
C4 C3 C2 119.8(3) . . ? 
C5 C4 C3 120.0(3) . . ? 
C6 C5 C4 120.0(3) . . ? 
C5 C6 C7 120.7(3) . . ? 
C6 C7 C2 120.0(3) . . ? 
C9 C8 C13 120.2(2) . . ? 
C9 C8 P1 119.2(2) . . ? 
C13 C8 P1 120.6(2) . . ? 
C8 C9 C10 119.5(3) . . ? 
C11 C10 C9 120.3(3) . . ? 
C10 C11 C12 120.0(3) . . ? 
C11 C12 C13 120.5(3) . . ? 
C12 C13 C8 119.5(3) . . ? 
C15 C14 C19 119.4(3) . . ? 
C15 C14 P2 121.2(2) . . ? 
C19 C14 P2 119.2(2) . . ? 
C16 C15 C14 120.0(3) . . ? 
C17 C16 C15 120.2(3) . . ? 
C16 C17 C18 120.9(3) . . ? 
C17 C18 C19 120.0(3) . . ? 
C18 C19 C14 119.4(3) . . ? 
C25 C20 C21 119.0(2) . . ? 
C25 C20 P2 121.9(2) . . ? 
C21 C20 P2 119.0(2) . . ? 
C22 C21 C20 120.5(3) . . ? 
C21 C22 C23 120.5(3) . . ? 
C22 C23 C24 119.6(3) . . ? 
C23 C24 C25 120.5(3) . . ? 
C24 C25 C20 119.9(3) . . ? 
N9 C26 C27 110.8(2) . . ? 
N9 C26 C28 113.6(2) . . ? 
C27 C26 C28 112.1(2) . . ? 
C29 C28 C33 118.4(3) . . ? 
C29 C28 C26 121.8(3) . . ? 
C33 C28 C26 119.8(3) . . ? 
C30 C29 C28 121.0(3) . . ? 
C31 C30 C29 120.1(3) . . ? 
C30 C31 C32 120.1(3) . . ? 
C33 C32 C31 119.7(3) . . ? 
C32 C33 C28 120.6(3) . . ? 
 
_diffrn_measured_fraction_theta_max    0.997 
_diffrn_reflns_theta_full              30.02 
_diffrn_measured_fraction_theta_full   0.997 
_refine_diff_density_max    0.857 
_refine_diff_density_min   -0.923 
_refine_diff_density_rms    0.087 
#END====
data_pdmeobenziminop 
# compound 5a
 
_audit_creation_method            SHELXL-97 
_chemical_name_systematic 
; 
 ? 
; 
_chemical_name_common             ? 
_chemical_melting_point           ? 
_chemical_formula_moiety          ? 
_chemical_formula_sum 
 'C37 H39 Br Cl N O2 P2 Pd' 
_chemical_formula_weight          813.39 
 
loop_ 
 _atom_type_symbol 
 _atom_type_description 
 _atom_type_scat_dispersion_real 
 _atom_type_scat_dispersion_imag 
 _atom_type_scat_source 
 'C'  'C'   0.0033   0.0016 
 'International Tables Vol C Tables 4.2.6.8 and 6.1.1.4' 
 'H'  'H'   0.0000   0.0000 
 'International Tables Vol C Tables 4.2.6.8 and 6.1.1.4' 
 'N'  'N'   0.0061   0.0033 
 'International Tables Vol C Tables 4.2.6.8 and 6.1.1.4' 
 'O'  'O'   0.0106   0.0060 
 'International Tables Vol C Tables 4.2.6.8 and 6.1.1.4' 
 'P'  'P'   0.1023   0.0942 
 'International Tables Vol C Tables 4.2.6.8 and 6.1.1.4' 
 'Cl'  'Cl'   0.1484   0.1585 
 'International Tables Vol C Tables 4.2.6.8 and 6.1.1.4' 
 'Br'  'Br'  -0.2901   2.4595 
 'International Tables Vol C Tables 4.2.6.8 and 6.1.1.4' 
 'Pd'  'Pd'  -0.9988   1.0072 
 'International Tables Vol C Tables 4.2.6.8 and 6.1.1.4' 
 
_symmetry_cell_setting            'Triclinic'
_symmetry_space_group_name_H-M    'P-1     '
 
loop_ 
 _symmetry_equiv_pos_as_xyz 
 'x, y, z' 
 '-x, -y, -z' 
 
_cell_length_a                    9.5450(10) 
_cell_length_b                    10.5560(10) 
_cell_length_c                    18.1810(10) 
_cell_angle_alpha                 93.1420(10) 
_cell_angle_beta                  102.6860(10) 
_cell_angle_gamma                 106.8090(10) 
_cell_volume                      1697.0(3) 
_cell_formula_units_Z             2 
_cell_measurement_temperature     150.0(1)
_cell_measurement_reflns_used     251
_cell_measurement_theta_min       3.0
_cell_measurement_theta_max       20.0
 
_exptl_crystal_description        'block'
_exptl_crystal_colour             'orange'
_exptl_crystal_size_max           0.18 
_exptl_crystal_size_mid           0.18 
_exptl_crystal_size_min           0.18 
_exptl_crystal_density_meas       ? 
_exptl_crystal_density_diffrn     1.592 
_exptl_crystal_density_method     'not measured' 
_exptl_crystal_F_000              824 
_exptl_absorpt_coefficient_mu     1.932 
_exptl_absorpt_correction_type    'multi-scan'
_exptl_absorpt_correction_T_min   0.7224 
_exptl_absorpt_correction_T_max   0.7224 
_exptl_absorpt_process_details    ? 
 
_exptl_special_details 
; 
 ? 
; 
 
_diffrn_ambient_temperature       150.0(1)
_diffrn_radiation_wavelength      0.71069 
_diffrn_radiation_type            MoK\a 
_diffrn_radiation_source          'fine-focus sealed tube' 
_diffrn_radiation_monochromator   graphite 
_diffrn_measurement_device_type   'KappaCCD'
_diffrn_measurement_method        'phi and omega scans'
_diffrn_detector_area_resol_mean  ? 
_diffrn_standards_number          ? 
_diffrn_standards_interval_count  ? 
_diffrn_standards_interval_time   ? 
_diffrn_standards_decay_%         ? 
_diffrn_reflns_number             13220 
_diffrn_reflns_av_R_equivalents   0.0150 
_diffrn_reflns_av_sigmaI/netI     0.0338 
_diffrn_reflns_limit_h_min        -8 
_diffrn_reflns_limit_h_max        13 
_diffrn_reflns_limit_k_min        -14 
_diffrn_reflns_limit_k_max        13 
_diffrn_reflns_limit_l_min        -25 
_diffrn_reflns_limit_l_max        22 
_diffrn_reflns_theta_min          3.23 
_diffrn_reflns_theta_max          30.03 
_reflns_number_total              9834 
_reflns_number_gt                 8631 
_reflns_threshold_expression      >2sigma(I) 
 
_computing_data_collection        ? 
_computing_cell_refinement        ? 
_computing_data_reduction         ? 
_computing_structure_solution     'SHELXS-97 (Sheldrick, 1990)' 
_computing_structure_refinement   'SHELXL-97 (Sheldrick, 1997)' 
_computing_molecular_graphics     ? 
_computing_publication_material   ? 
 
_refine_special_details 
; 
 Refinement of F^2^ against ALL reflections.  The weighted R-factor wR and 
 goodness of fit S are based on F^2^, conventional R-factors R are based 
 on F, with F set to zero for negative F^2^. The threshold expression of 
 F^2^ > 2sigma(F^2^) is used only for calculating R-factors(gt) etc. and is 
 not relevant to the choice of reflections for refinement.  R-factors based 
 on F^2^ are statistically about twice as large as those based on F, and R- 
 factors based on ALL data will be even larger. 
; 
 
_refine_ls_structure_factor_coef  Fsqd  
_refine_ls_matrix_type            full 
_refine_ls_weighting_scheme       calc  
_refine_ls_weighting_details 
 'calc w=1/[\s^2^(Fo^2^)+(0.0395P)^2^+1.5250P] where P=(Fo^2^+2Fc^2^)/3' 
_atom_sites_solution_primary      direct 
_atom_sites_solution_secondary    difmap 
_atom_sites_solution_hydrogens    geom 
_refine_ls_hydrogen_treatment     mixed 
_refine_ls_extinction_method      none 
_refine_ls_extinction_coef        ? 
_refine_ls_number_reflns          9834 
_refine_ls_number_parameters      414 
_refine_ls_number_restraints      1 
_refine_ls_R_factor_all           0.0378 
_refine_ls_R_factor_gt            0.0312 
_refine_ls_wR_factor_ref          0.0863 
_refine_ls_wR_factor_gt           0.0834 
_refine_ls_goodness_of_fit_ref    1.021 
_refine_ls_restrained_S_all       1.021 
_refine_ls_shift/su_max           0.001 
_refine_ls_shift/su_mean          0.000 
 
loop_ 
 _atom_site_label 
 _atom_site_type_symbol 
 _atom_site_fract_x 
 _atom_site_fract_y 
 _atom_site_fract_z 
 _atom_site_U_iso_or_equiv 
 _atom_site_adp_type 
 _atom_site_occupancy 
 _atom_site_symmetry_multiplicity 
 _atom_site_calc_flag 
 _atom_site_refinement_flags 
 _atom_site_disorder_assembly 
 _atom_site_disorder_group 
Pd1 Pd -0.226331(17) 0.117577(14) 0.273150(9) 0.02051(5) Uani 1 1 d D . . 
Br1 Br -0.2970(5) -0.1011(2) 0.2015(2) 0.0270(3) Uani 0.50 1 d P A 1 
Br2 Br -0.3759(3) 0.02995(18) 0.36537(11) 0.0230(2) Uani 0.50 1 d P A 1 
Cl2 Cl -0.3794(8) 0.0118(5) 0.3553(3) 0.0230(2) Uani 0.50 1 d P A 2 
Cl1 Cl -0.3050(12) -0.0868(6) 0.2001(6) 0.0270(3) Uani 0.50 1 d PD A 2 
P1 P -0.08140(6) 0.19632(5) 0.19537(3) 0.01973(10) Uani 1 1 d . A . 
P2 P 0.01570(6) 0.38573(5) 0.33501(3) 0.02018(10) Uani 1 1 d . . . 
O1 O -0.67010(19) 0.58223(17) 0.19917(10) 0.0330(4) Uani 1 1 d . A . 
N1 N -0.16040(19) 0.31212(17) 0.32633(10) 0.0219(3) Uani 1 1 d . A . 
C1 C 0.0430(2) 0.36446(19) 0.24048(12) 0.0223(4) Uani 1 1 d . A . 
H1A H 0.1498 0.3721 0.2430 0.027 Uiso 1 1 calc R . . 
H1B H 0.0161 0.4336 0.2108 0.027 Uiso 1 1 calc R . . 
C2 C -0.1784(2) 0.2230(2) 0.10293(12) 0.0230(4) Uani 1 1 d . . . 
C3 C -0.1014(3) 0.3121(2) 0.06044(13) 0.0293(4) Uani 1 1 d . A . 
H3 H 0.0032 0.3582 0.0796 0.035 Uiso 1 1 calc R . . 
C4 C -0.1776(3) 0.3334(3) -0.00970(14) 0.0358(5) Uani 1 1 d . . . 
H4 H -0.1249 0.3933 -0.0388 0.043 Uiso 1 1 calc R A . 
C5 C -0.3304(3) 0.2672(3) -0.03734(14) 0.0374(5) Uani 1 1 d . A . 
H5 H -0.3823 0.2821 -0.0854 0.045 Uiso 1 1 calc R . . 
C6 C -0.4077(3) 0.1798(3) 0.00453(14) 0.0368(5) Uani 1 1 d . . . 
H6 H -0.5125 0.1347 -0.0147 0.044 Uiso 1 1 calc R A . 
C7 C -0.3318(3) 0.1575(2) 0.07534(13) 0.0290(4) Uani 1 1 d . A . 
H7 H -0.3850 0.0978 0.1044 0.035 Uiso 1 1 calc R . . 
C8 C 0.0528(2) 0.11135(19) 0.18049(13) 0.0232(4) Uani 1 1 d . . . 
C9 C 0.1395(3) 0.0782(2) 0.24467(14) 0.0296(5) Uani 1 1 d . A . 
H9 H 0.1184 0.0899 0.2928 0.036 Uiso 1 1 calc R . . 
C10 C 0.2563(3) 0.0285(2) 0.23802(15) 0.0335(5) Uani 1 1 d . . . 
H10 H 0.3157 0.0069 0.2818 0.040 Uiso 1 1 calc R A . 
C11 C 0.2865(3) 0.0102(2) 0.16802(16) 0.0353(5) Uani 1 1 d . A . 
H11 H 0.3682 -0.0217 0.1639 0.042 Uiso 1 1 calc R . . 
C12 C 0.1978(3) 0.0382(3) 0.10406(16) 0.0373(6) Uani 1 1 d . . . 
H12 H 0.2168 0.0228 0.0557 0.045 Uiso 1 1 calc R A . 
C13 C 0.0806(3) 0.0890(2) 0.10996(14) 0.0303(5) Uani 1 1 d . A . 
H13 H 0.0200 0.1083 0.0658 0.036 Uiso 1 1 calc R . . 
C14 C 0.1399(2) 0.3160(2) 0.39801(12) 0.0226(4) Uani 1 1 d . A . 
C15 C 0.0793(3) 0.2306(2) 0.44699(13) 0.0257(4) Uani 1 1 d . . . 
H15 H -0.0240 0.2122 0.4474 0.031 Uiso 1 1 calc R A . 
C16 C 0.1708(3) 0.1728(2) 0.49509(13) 0.0296(5) Uani 1 1 d . A . 
H16 H 0.1303 0.1155 0.5289 0.036 Uiso 1 1 calc R . . 
C17 C 0.3205(3) 0.1985(2) 0.49386(13) 0.0310(5) Uani 1 1 d . . . 
H17 H 0.3824 0.1579 0.5264 0.037 Uiso 1 1 calc R A . 
C18 C 0.3811(3) 0.2834(3) 0.44530(15) 0.0344(5) Uani 1 1 d . A . 
H18 H 0.4844 0.3011 0.4449 0.041 Uiso 1 1 calc R . . 
C19 C 0.2914(3) 0.3424(2) 0.39736(13) 0.0296(5) Uani 1 1 d . . . 
H19 H 0.3329 0.4006 0.3642 0.036 Uiso 1 1 calc R A . 
C20 C 0.0710(2) 0.5622(2) 0.36441(12) 0.0239(4) Uani 1 1 d . A . 
C21 C 0.1959(3) 0.6280(2) 0.42298(13) 0.0290(5) Uani 1 1 d . . . 
H21 H 0.2538 0.5792 0.4511 0.035 Uiso 1 1 calc R A . 
C22 C 0.2362(3) 0.7658(2) 0.44041(14) 0.0370(6) Uani 1 1 d . A . 
H22 H 0.3224 0.8111 0.4802 0.044 Uiso 1 1 calc R . . 
C23 C 0.1517(3) 0.8368(2) 0.40015(15) 0.0381(6) Uani 1 1 d . . . 
H23 H 0.1801 0.9308 0.4123 0.046 Uiso 1 1 calc R A . 
C24 C 0.0255(3) 0.7719(2) 0.34205(15) 0.0347(5) Uani 1 1 d . A . 
H24 H -0.0333 0.8211 0.3150 0.042 Uiso 1 1 calc R . . 
C25 C -0.0145(3) 0.6346(2) 0.32350(13) 0.0281(4) Uani 1 1 d . . . 
H25 H -0.0998 0.5898 0.2831 0.034 Uiso 1 1 calc R A . 
C26 C -0.2468(2) 0.3618(2) 0.37235(12) 0.0250(4) Uani 1 1 d . . . 
H26A H -0.1758 0.4300 0.4138 0.030 Uiso 1 1 calc R A . 
H26B H -0.3024 0.2872 0.3959 0.030 Uiso 1 1 calc R . . 
C27 C -0.3582(2) 0.4220(2) 0.32619(12) 0.0232(4) Uani 1 1 d . A . 
C28 C -0.4587(3) 0.3544(2) 0.25828(13) 0.0272(4) Uani 1 1 d . . . 
H28 H -0.4571 0.2689 0.2400 0.033 Uiso 1 1 calc R A . 
C29 C -0.5608(3) 0.4103(2) 0.21713(13) 0.0287(4) Uani 1 1 d . A . 
H29 H -0.6290 0.3629 0.1710 0.034 Uiso 1 1 calc R . . 
C30 C -0.5636(2) 0.5359(2) 0.24319(13) 0.0266(4) Uani 1 1 d . . . 
C31 C -0.4636(3) 0.6053(2) 0.31031(14) 0.0283(4) Uani 1 1 d . A . 
H31 H -0.4638 0.6915 0.3282 0.034 Uiso 1 1 calc R . . 
C32 C -0.3627(3) 0.5466(2) 0.35115(13) 0.0279(4) Uani 1 1 d . . . 
H32 H -0.2951 0.5936 0.3975 0.033 Uiso 1 1 calc R A . 
C33 C -0.6877(3) 0.7025(3) 0.23083(16) 0.0366(5) Uani 1 1 d . . . 
H33A H -0.7035 0.6925 0.2819 0.055 Uiso 1 1 calc R A . 
H33B H -0.7751 0.7199 0.1985 0.055 Uiso 1 1 calc R . . 
H33C H -0.5966 0.7773 0.2337 0.055 Uiso 1 1 calc R . . 
O2 O -0.1033(3) 0.5958(2) 0.13423(13) 0.0518(5) Uani 1 1 d . . . 
C34 C -0.2643(4) 0.5484(3) 0.1216(3) 0.0626(10) Uani 1 1 d . . . 
H34A H -0.2972 0.5794 0.1653 0.075 Uiso 1 1 calc R . . 
H34B H -0.3028 0.4498 0.1121 0.075 Uiso 1 1 calc R . . 
C35 C -0.3183(5) 0.6119(4) 0.0494(4) 0.116(2) Uani 1 1 d . . . 
H35A H -0.3396 0.5498 0.0026 0.139 Uiso 1 1 calc R . . 
H35B H -0.4106 0.6357 0.0514 0.139 Uiso 1 1 calc R . . 
C36 C -0.1901(5) 0.7328(4) 0.0517(2) 0.0662(10) Uani 1 1 d . . . 
H36A H -0.2193 0.8148 0.0579 0.079 Uiso 1 1 calc R . . 
H36B H -0.1537 0.7309 0.0049 0.079 Uiso 1 1 calc R . . 
C37 C -0.0707(4) 0.7260(3) 0.1206(2) 0.0528(8) Uani 1 1 d . . . 
H37A H 0.0308 0.7572 0.1106 0.063 Uiso 1 1 calc R . . 
H37B H -0.0722 0.7833 0.1652 0.063 Uiso 1 1 calc R . . 
 
loop_ 
 _atom_site_aniso_label 
 _atom_site_aniso_U_11 
 _atom_site_aniso_U_22 
 _atom_site_aniso_U_33 
 _atom_site_aniso_U_23 
 _atom_site_aniso_U_13 
 _atom_site_aniso_U_12 
Pd1 0.01857(8) 0.01855(7) 0.02408(8) 0.00526(5) 0.00590(6) 0.00431(5) 
Br1 0.0285(5) 0.0169(5) 0.0355(2) 0.0015(5) 0.0094(3) 0.0060(4) 
Br2 0.0266(2) 0.0204(6) 0.0195(6) 0.0015(3) 0.0080(4) 0.0020(4) 
Cl2 0.0266(2) 0.0204(6) 0.0195(6) 0.0015(3) 0.0080(4) 0.0020(4) 
Cl1 0.0285(5) 0.0169(5) 0.0355(2) 0.0015(5) 0.0094(3) 0.0060(4) 
P1 0.0195(2) 0.0176(2) 0.0222(2) 0.00311(18) 0.00587(19) 0.00544(18) 
P2 0.0195(2) 0.0182(2) 0.0225(2) 0.00309(18) 0.00583(19) 0.00472(18) 
O1 0.0302(9) 0.0340(8) 0.0380(9) 0.0135(7) 0.0069(7) 0.0142(7) 
N1 0.0189(8) 0.0204(7) 0.0269(9) 0.0027(6) 0.0072(7) 0.0056(6) 
C1 0.0226(10) 0.0201(9) 0.0235(10) 0.0032(7) 0.0079(8) 0.0038(7) 
C2 0.0269(10) 0.0226(9) 0.0214(9) 0.0038(7) 0.0060(8) 0.0105(8) 
C3 0.0327(12) 0.0286(10) 0.0291(11) 0.0076(8) 0.0106(9) 0.0104(9) 
C4 0.0492(15) 0.0353(12) 0.0303(12) 0.0129(10) 0.0147(11) 0.0189(11) 
C5 0.0479(15) 0.0397(13) 0.0269(12) 0.0054(10) 0.0031(10) 0.0213(11) 
C6 0.0353(13) 0.0410(13) 0.0315(12) 0.0030(10) -0.0014(10) 0.0156(11) 
C7 0.0263(11) 0.0299(10) 0.0290(11) 0.0052(9) 0.0038(9) 0.0077(9) 
C8 0.0209(9) 0.0179(8) 0.0308(11) 0.0033(7) 0.0067(8) 0.0055(7) 
C9 0.0304(11) 0.0264(10) 0.0333(12) 0.0050(9) 0.0063(9) 0.0116(9) 
C10 0.0292(12) 0.0271(10) 0.0443(14) 0.0057(10) 0.0039(10) 0.0124(9) 
C11 0.0292(12) 0.0259(10) 0.0576(16) 0.0098(10) 0.0169(11) 0.0134(9) 
C12 0.0434(14) 0.0358(12) 0.0447(14) 0.0091(11) 0.0239(12) 0.0199(11) 
C13 0.0328(12) 0.0317(11) 0.0314(12) 0.0068(9) 0.0106(9) 0.0150(9) 
C14 0.0228(10) 0.0208(9) 0.0238(10) 0.0030(7) 0.0057(8) 0.0064(7) 
C15 0.0253(10) 0.0243(9) 0.0269(10) 0.0042(8) 0.0078(8) 0.0054(8) 
C16 0.0351(12) 0.0265(10) 0.0265(11) 0.0062(8) 0.0073(9) 0.0079(9) 
C17 0.0333(12) 0.0321(11) 0.0281(11) 0.0042(9) 0.0022(9) 0.0148(9) 
C18 0.0259(11) 0.0453(13) 0.0357(13) 0.0105(10) 0.0081(9) 0.0155(10) 
C19 0.0231(10) 0.0357(11) 0.0307(11) 0.0092(9) 0.0075(9) 0.0085(9) 
C20 0.0275(10) 0.0199(9) 0.0250(10) 0.0037(7) 0.0097(8) 0.0059(8) 
C21 0.0368(12) 0.0243(10) 0.0229(10) 0.0024(8) 0.0064(9) 0.0057(9) 
C22 0.0478(15) 0.0266(11) 0.0275(12) -0.0033(9) 0.0046(10) 0.0022(10) 
C23 0.0551(16) 0.0212(10) 0.0358(13) -0.0001(9) 0.0144(12) 0.0069(10) 
C24 0.0451(14) 0.0247(10) 0.0389(13) 0.0075(9) 0.0141(11) 0.0141(10) 
C25 0.0307(11) 0.0234(10) 0.0308(11) 0.0049(8) 0.0088(9) 0.0082(8) 
C26 0.0244(10) 0.0280(10) 0.0247(10) 0.0050(8) 0.0086(8) 0.0091(8) 
C27 0.0218(10) 0.0219(9) 0.0264(10) 0.0038(8) 0.0086(8) 0.0056(7) 
C28 0.0253(11) 0.0224(9) 0.0331(11) 0.0007(8) 0.0076(9) 0.0065(8) 
C29 0.0251(11) 0.0291(10) 0.0294(11) 0.0011(8) 0.0044(9) 0.0068(8) 
C30 0.0222(10) 0.0283(10) 0.0320(11) 0.0111(9) 0.0089(8) 0.0086(8) 
C31 0.0287(11) 0.0221(9) 0.0351(12) 0.0035(8) 0.0089(9) 0.0087(8) 
C32 0.0256(11) 0.0249(10) 0.0313(11) -0.0012(8) 0.0055(9) 0.0071(8) 
C33 0.0362(13) 0.0370(12) 0.0466(15) 0.0168(11) 0.0149(11) 0.0206(11) 
O2 0.0469(12) 0.0588(13) 0.0508(12) 0.0093(10) 0.0085(10) 0.0203(10) 
C34 0.053(2) 0.0410(16) 0.100(3) 0.0106(17) 0.030(2) 0.0140(14) 
C35 0.052(2) 0.064(2) 0.200(6) -0.052(3) -0.038(3) 0.033(2) 
C36 0.077(3) 0.066(2) 0.075(3) 0.0247(19) 0.034(2) 0.037(2) 
C37 0.0395(16) 0.0558(18) 0.063(2) -0.0040(15) 0.0115(14) 0.0173(14) 
 
_geom_special_details 
; 
 All esds (except the esd in the dihedral angle between two l.s. planes) 
 are estimated using the full covariance matrix.  The cell esds are taken 
 into account individually in the estimation of esds in distances, angles 
 and torsion angles; correlations between esds in cell parameters are only 
 used when they are defined by crystal symmetry.  An approximate (isotropic) 
 treatment of cell esds is used for estimating esds involving l.s. planes. 
; 
 
loop_ 
 _geom_bond_atom_site_label_1 
 _geom_bond_atom_site_label_2 
 _geom_bond_distance 
 _geom_bond_site_symmetry_2 
 _geom_bond_publ_flag 
Pd1 N1 2.0774(17) . ? 
Pd1 P1 2.2197(5) . ? 
Pd1 Cl1 2.301(5) . ? 
Pd1 Cl2 2.410(6) . ? 
Pd1 Br1 2.4218(17) . ? 
Pd1 Br2 2.482(2) . ? 
P1 C2 1.811(2) . ? 
P1 C8 1.819(2) . ? 
P1 C1 1.851(2) . ? 
P2 N1 1.6027(18) . ? 
P2 C20 1.798(2) . ? 
P2 C14 1.806(2) . ? 
P2 C1 1.806(2) . ? 
O1 C30 1.374(3) . ? 
O1 C33 1.434(3) . ? 
N1 C26 1.470(3) . ? 
C2 C7 1.389(3) . ? 
C2 C3 1.397(3) . ? 
C3 C4 1.387(3) . ? 
C4 C5 1.385(4) . ? 
C5 C6 1.380(4) . ? 
C6 C7 1.400(3) . ? 
C8 C13 1.387(3) . ? 
C8 C9 1.399(3) . ? 
C9 C10 1.387(3) . ? 
C10 C11 1.381(4) . ? 
C11 C12 1.381(4) . ? 
C12 C13 1.394(3) . ? 
C14 C19 1.393(3) . ? 
C14 C15 1.398(3) . ? 
C15 C16 1.390(3) . ? 
C16 C17 1.381(3) . ? 
C17 C18 1.389(3) . ? 
C18 C19 1.387(3) . ? 
C20 C21 1.386(3) . ? 
C20 C25 1.399(3) . ? 
C21 C22 1.391(3) . ? 
C22 C23 1.378(4) . ? 
C23 C24 1.385(4) . ? 
C24 C25 1.390(3) . ? 
C26 C27 1.516(3) . ? 
C27 C32 1.383(3) . ? 
C27 C28 1.393(3) . ? 
C28 C29 1.385(3) . ? 
C29 C30 1.393(3) . ? 
C30 C31 1.387(3) . ? 
C31 C32 1.394(3) . ? 
O2 C37 1.368(4) . ? 
O2 C34 1.432(4) . ? 
C34 C35 1.560(7) . ? 
C35 C36 1.482(6) . ? 
C36 C37 1.518(5) . ? 
 
loop_ 
 _geom_angle_atom_site_label_1 
 _geom_angle_atom_site_label_2 
 _geom_angle_atom_site_label_3 
 _geom_angle 
 _geom_angle_site_symmetry_1 
 _geom_angle_site_symmetry_3 
 _geom_angle_publ_flag 
N1 Pd1 P1 86.84(5) . . ? 
N1 Pd1 Cl1 172.8(3) . . ? 
P1 Pd1 Cl1 88.3(3) . . ? 
N1 Pd1 Cl2 98.08(11) . . ? 
P1 Pd1 Cl2 174.46(13) . . ? 
Cl1 Pd1 Cl2 87.1(3) . . ? 
N1 Pd1 Br1 174.96(12) . . ? 
P1 Pd1 Br1 88.46(11) . . ? 
Cl1 Pd1 Br1 3.5(3) . . ? 
Cl2 Pd1 Br1 86.70(15) . . ? 
N1 Pd1 Br2 92.55(6) . . ? 
P1 Pd1 Br2 176.90(6) . . ? 
Cl1 Pd1 Br2 92.6(3) . . ? 
Cl2 Pd1 Br2 5.55(13) . . ? 
Br1 Pd1 Br2 92.24(12) . . ? 
C2 P1 C8 107.46(10) . . ? 
C2 P1 C1 104.56(9) . . ? 
C8 P1 C1 102.63(9) . . ? 
C2 P1 Pd1 115.99(7) . . ? 
C8 P1 Pd1 117.80(7) . . ? 
C1 P1 Pd1 106.73(7) . . ? 
N1 P2 C20 113.31(10) . . ? 
N1 P2 C14 114.22(10) . . ? 
C20 P2 C14 108.44(10) . . ? 
N1 P2 C1 104.88(10) . . ? 
C20 P2 C1 107.11(9) . . ? 
C14 P2 C1 108.51(10) . . ? 
C30 O1 C33 116.14(19) . . ? 
C26 N1 P2 121.68(14) . . ? 
C26 N1 Pd1 123.79(13) . . ? 
P2 N1 Pd1 111.66(9) . . ? 
P2 C1 P1 107.00(10) . . ? 
C7 C2 C3 119.8(2) . . ? 
C7 C2 P1 119.52(17) . . ? 
C3 C2 P1 120.61(17) . . ? 
C4 C3 C2 120.0(2) . . ? 
C5 C4 C3 120.0(2) . . ? 
C6 C5 C4 120.3(2) . . ? 
C5 C6 C7 120.1(2) . . ? 
C2 C7 C6 119.7(2) . . ? 
C13 C8 C9 119.5(2) . . ? 
C13 C8 P1 122.74(17) . . ? 
C9 C8 P1 117.50(17) . . ? 
C10 C9 C8 120.0(2) . . ? 
C11 C10 C9 120.2(2) . . ? 
C10 C11 C12 120.0(2) . . ? 
C11 C12 C13 120.4(2) . . ? 
C8 C13 C12 119.8(2) . . ? 
C19 C14 C15 120.0(2) . . ? 
C19 C14 P2 121.89(16) . . ? 
C15 C14 P2 118.11(16) . . ? 
C16 C15 C14 119.7(2) . . ? 
C17 C16 C15 120.1(2) . . ? 
C16 C17 C18 120.3(2) . . ? 
C19 C18 C17 120.2(2) . . ? 
C18 C19 C14 119.7(2) . . ? 
C21 C20 C25 119.8(2) . . ? 
C21 C20 P2 122.84(17) . . ? 
C25 C20 P2 117.28(17) . . ? 
C20 C21 C22 119.8(2) . . ? 
C23 C22 C21 120.3(2) . . ? 
C22 C23 C24 120.5(2) . . ? 
C23 C24 C25 119.7(2) . . ? 
C24 C25 C20 119.9(2) . . ? 
N1 C26 C27 112.69(17) . . ? 
C32 C27 C28 118.2(2) . . ? 
C32 C27 C26 120.26(19) . . ? 
C28 C27 C26 121.51(19) . . ? 
C29 C28 C27 120.8(2) . . ? 
C28 C29 C30 120.1(2) . . ? 
O1 C30 C31 124.1(2) . . ? 
O1 C30 C29 115.9(2) . . ? 
C31 C30 C29 119.9(2) . . ? 
C30 C31 C32 119.0(2) . . ? 
C27 C32 C31 121.9(2) . . ? 
C37 O2 C34 105.1(2) . . ? 
O2 C34 C35 102.6(3) . . ? 
C36 C35 C34 104.3(3) . . ? 
C35 C36 C37 103.5(3) . . ? 
O2 C37 C36 107.4(3) . . ? 
 
_diffrn_measured_fraction_theta_max    0.990 
_diffrn_reflns_theta_full              30.03 
_diffrn_measured_fraction_theta_full   0.990 
_refine_diff_density_max    1.436 
_refine_diff_density_min   -0.955 
_refine_diff_density_rms    0.079 
#END====
 data_pdcl2iminopph 
# compound 5c

_audit_creation_method            SHELXL-97 
_chemical_name_systematic 
; 
 ? 
; 
_chemical_name_common             ? 
_chemical_melting_point           ? 
_chemical_formula_moiety          ? 
_chemical_formula_sum 
 'C31 H27 Cl2 N P2 Pd' 
_chemical_formula_weight          652.78 
 
loop_ 
 _atom_type_symbol 
 _atom_type_description 
 _atom_type_scat_dispersion_real 
 _atom_type_scat_dispersion_imag 
 _atom_type_scat_source 
 'C'  'C'   0.0033   0.0016 
 'International Tables Vol C Tables 4.2.6.8 and 6.1.1.4' 
 'H'  'H'   0.0000   0.0000 
 'International Tables Vol C Tables 4.2.6.8 and 6.1.1.4' 
 'N'  'N'   0.0061   0.0033 
 'International Tables Vol C Tables 4.2.6.8 and 6.1.1.4' 
 'P'  'P'   0.1023   0.0942 
 'International Tables Vol C Tables 4.2.6.8 and 6.1.1.4' 
 'Cl'  'Cl'   0.1484   0.1585 
 'International Tables Vol C Tables 4.2.6.8 and 6.1.1.4' 
 'Pd'  'Pd'  -0.9988   1.0072 
 'International Tables Vol C Tables 4.2.6.8 and 6.1.1.4' 
 
_symmetry_cell_setting            'Monoclinic'
_symmetry_space_group_name_H-M    'P21/c     '
 
loop_ 
 _symmetry_equiv_pos_as_xyz 
 'x, y, z' 
 '-x, y+1/2, -z+1/2' 
 '-x, -y, -z' 
 'x, -y-1/2, z-1/2' 
 
_cell_length_a                    11.3600(10) 
_cell_length_b                    14.8220(10) 
_cell_length_c                    17.0950(10) 
_cell_angle_alpha                 90.00 
_cell_angle_beta                  105.1700(10) 
_cell_angle_gamma                 90.00 
_cell_volume                      2778.1(3) 
_cell_formula_units_Z             4 
_cell_measurement_temperature     150.0(1)
_cell_measurement_reflns_used     251
_cell_measurement_theta_min       3.0
_cell_measurement_theta_max       20.0
 
_exptl_crystal_description        'needle'
_exptl_crystal_colour             'orange'
_exptl_crystal_size_max           0.22 
_exptl_crystal_size_mid           0.16 
_exptl_crystal_size_min           0.14 
_exptl_crystal_density_meas       ? 
_exptl_crystal_density_diffrn     1.561 
_exptl_crystal_density_method     'not measured' 
_exptl_crystal_F_000              1320 
_exptl_absorpt_coefficient_mu     0.998 
_exptl_absorpt_correction_type    'multi-scan'
_exptl_absorpt_correction_T_min   0.8104 
_exptl_absorpt_correction_T_max   0.8730 
_exptl_absorpt_process_details    ? 
 
_exptl_special_details 
; 
 ? 
; 
 
_diffrn_ambient_temperature       150.0(1)
_diffrn_radiation_wavelength      0.71069 
_diffrn_radiation_type            MoK\a 
_diffrn_radiation_source          'fine-focus sealed tube' 
_diffrn_radiation_monochromator   graphite 
_diffrn_measurement_device_type   'KappaCCD'
_diffrn_measurement_method        'phi and omega scans'
_diffrn_detector_area_resol_mean  ? 
_diffrn_standards_number          ? 
_diffrn_standards_interval_count  ? 
_diffrn_standards_interval_time   ? 
_diffrn_standards_decay_%         ? 
_diffrn_reflns_number             14300 
_diffrn_reflns_av_R_equivalents   0.0224 
_diffrn_reflns_av_sigmaI/netI     0.0487 
_diffrn_reflns_limit_h_min        -15 
_diffrn_reflns_limit_h_max        15 
_diffrn_reflns_limit_k_min        -19 
_diffrn_reflns_limit_k_max        20 
_diffrn_reflns_limit_l_min        -24 
_diffrn_reflns_limit_l_max        24 
_diffrn_reflns_theta_min          2.83 
_diffrn_reflns_theta_max          29.99 
_reflns_number_total              8054 
_reflns_number_gt                 6288 
_reflns_threshold_expression      >2sigma(I) 
 
_computing_data_collection        ? 
_computing_cell_refinement        ? 
_computing_data_reduction         ? 
_computing_structure_solution     'SHELXS-97 (Sheldrick, 1990)' 
_computing_structure_refinement   'SHELXL-97 (Sheldrick, 1997)' 
_computing_molecular_graphics     ? 
_computing_publication_material   ? 
 
_refine_special_details 
; 
 Refinement of F^2^ against ALL reflections.  The weighted R-factor wR and 
 goodness of fit S are based on F^2^, conventional R-factors R are based 
 on F, with F set to zero for negative F^2^. The threshold expression of 
 F^2^ > 2sigma(F^2^) is used only for calculating R-factors(gt) etc. and is 
 not relevant to the choice of reflections for refinement.  R-factors based 
 on F^2^ are statistically about twice as large as those based on F, and R- 
 factors based on ALL data will be even larger. 
; 
 
_refine_ls_structure_factor_coef  Fsqd  
_refine_ls_matrix_type            full 
_refine_ls_weighting_scheme       calc  
_refine_ls_weighting_details 
 'calc w=1/[\s^2^(Fo^2^)+(0.0484P)^2^+0.0000P] where P=(Fo^2^+2Fc^2^)/3' 
_atom_sites_solution_primary      direct 
_atom_sites_solution_secondary    difmap 
_atom_sites_solution_hydrogens    geom 
_refine_ls_hydrogen_treatment     mixed 
_refine_ls_extinction_method      none 
_refine_ls_extinction_coef        ? 
_refine_ls_number_reflns          8054 
_refine_ls_number_parameters      334 
_refine_ls_number_restraints      0 
_refine_ls_R_factor_all           0.0489 
_refine_ls_R_factor_gt            0.0341 
_refine_ls_wR_factor_ref          0.0939 
_refine_ls_wR_factor_gt           0.0883 
_refine_ls_goodness_of_fit_ref    1.019 
_refine_ls_restrained_S_all       1.019 
_refine_ls_shift/su_max           0.001 
_refine_ls_shift/su_mean          0.000 
 
loop_ 
 _atom_site_label 
 _atom_site_type_symbol 
 _atom_site_fract_x 
 _atom_site_fract_y 
 _atom_site_fract_z 
 _atom_site_U_iso_or_equiv 
 _atom_site_adp_type 
 _atom_site_occupancy 
 _atom_site_symmetry_multiplicity 
 _atom_site_calc_flag 
 _atom_site_refinement_flags 
 _atom_site_disorder_assembly 
 _atom_site_disorder_group 
Pd1 Pd 0.124926(14) 0.306220(10) 0.244992(9) 0.01709(6) Uani 1 1 d . . . 
Cl1 Cl -0.07552(5) 0.30419(3) 0.16982(3) 0.02502(12) Uani 1 1 d . . . 
Cl2 Cl 0.19547(5) 0.29188(3) 0.12700(3) 0.02124(11) Uani 1 1 d . . . 
P1 P 0.05536(5) 0.30611(3) 0.35445(3) 0.01695(12) Uani 1 1 d . . . 
P2 P 0.31885(5) 0.27556(4) 0.41045(3) 0.01879(12) Uani 1 1 d . . . 
N1 N 0.30108(16) 0.31443(11) 0.31958(11) 0.0201(4) Uani 1 1 d . . . 
C1 C -0.04214(19) 0.39909(13) 0.36636(12) 0.0202(4) Uani 1 1 d . . . 
C2 C 0.0025(2) 0.48735(14) 0.36715(14) 0.0275(5) Uani 1 1 d . . . 
H2 H 0.0837 0.4970 0.3638 0.033 Uiso 1 1 calc R . . 
C3 C -0.0702(2) 0.56036(15) 0.37277(14) 0.0315(5) Uani 1 1 d . . . 
H3 H -0.0393 0.6200 0.3734 0.038 Uiso 1 1 calc R . . 
C4 C -0.1885(2) 0.54599(16) 0.37748(14) 0.0324(5) Uani 1 1 d . . . 
H4 H -0.2392 0.5961 0.3806 0.039 Uiso 1 1 calc R . . 
C5 C -0.2334(2) 0.45995(16) 0.37770(15) 0.0329(5) Uani 1 1 d . . . 
H5 H -0.3143 0.4509 0.3820 0.040 Uiso 1 1 calc R . . 
C6 C -0.1606(2) 0.38573(15) 0.37166(14) 0.0267(5) Uani 1 1 d . . . 
H6 H -0.1921 0.3263 0.3712 0.032 Uiso 1 1 calc R . . 
C7 C -0.0172(2) 0.20237(13) 0.37177(13) 0.0200(4) Uani 1 1 d . . . 
C8 C -0.0365(2) 0.18516(14) 0.44824(14) 0.0248(5) Uani 1 1 d . . . 
H8 H -0.0157 0.2295 0.4897 0.030 Uiso 1 1 calc R . . 
C9 C -0.0858(2) 0.10372(15) 0.46325(15) 0.0305(5) Uani 1 1 d . . . 
H9 H -0.0983 0.0922 0.5151 0.037 Uiso 1 1 calc R . . 
C10 C -0.1170(2) 0.03892(15) 0.40308(15) 0.0327(6) Uani 1 1 d . . . 
H10 H -0.1505 -0.0170 0.4138 0.039 Uiso 1 1 calc R . . 
C11 C -0.0994(2) 0.05557(15) 0.32738(15) 0.0337(6) Uani 1 1 d . . . 
H11 H -0.1216 0.0112 0.2860 0.040 Uiso 1 1 calc R . . 
C12 C -0.0493(2) 0.13731(14) 0.31156(14) 0.0273(5) Uani 1 1 d . . . 
H12 H -0.0370 0.1484 0.2595 0.033 Uiso 1 1 calc R . . 
C13 C 0.19004(19) 0.31924(13) 0.44127(13) 0.0200(4) Uani 1 1 d . . . 
H13A H 0.2029 0.3837 0.4564 0.024 Uiso 1 1 calc R . . 
H13B H 0.1787 0.2853 0.4887 0.024 Uiso 1 1 calc R . . 
C14 C 0.31467(19) 0.15441(14) 0.41952(13) 0.0210(4) Uani 1 1 d . . . 
C15 C 0.2615(2) 0.10331(14) 0.35122(14) 0.0248(5) Uani 1 1 d . . . 
H15 H 0.2333 0.1318 0.2999 0.030 Uiso 1 1 calc R . . 
C16 C 0.2498(2) 0.01120(15) 0.35798(14) 0.0287(5) Uani 1 1 d . . . 
H16 H 0.2113 -0.0235 0.3116 0.034 Uiso 1 1 calc R . . 
C17 C 0.2940(2) -0.03061(14) 0.43191(15) 0.0291(5) Uani 1 1 d . . . 
H17 H 0.2878 -0.0942 0.4362 0.035 Uiso 1 1 calc R . . 
C18 C 0.3472(2) 0.02003(15) 0.49983(14) 0.0290(5) Uani 1 1 d . . . 
H18 H 0.3771 -0.0091 0.5506 0.035 Uiso 1 1 calc R . . 
C19 C 0.3574(2) 0.11305(14) 0.49466(14) 0.0252(5) Uani 1 1 d . . . 
H19 H 0.3930 0.1478 0.5416 0.030 Uiso 1 1 calc R . . 
C20 C 0.4582(2) 0.31294(13) 0.47952(13) 0.0228(5) Uani 1 1 d . . . 
C21 C 0.5679(2) 0.26748(16) 0.48251(15) 0.0302(5) Uani 1 1 d . . . 
H21 H 0.5677 0.2158 0.4496 0.036 Uiso 1 1 calc R . . 
C22 C 0.6759(2) 0.29796(16) 0.53327(17) 0.0369(6) Uani 1 1 d . . . 
H22 H 0.7502 0.2681 0.5340 0.044 Uiso 1 1 calc R . . 
C23 C 0.6766(2) 0.37103(19) 0.58261(17) 0.0435(7) Uani 1 1 d . . . 
H23 H 0.7511 0.3906 0.6184 0.052 Uiso 1 1 calc R . . 
C24 C 0.5702(3) 0.41602(18) 0.58056(16) 0.0437(7) Uani 1 1 d . . . 
H24 H 0.5715 0.4669 0.6146 0.052 Uiso 1 1 calc R . . 
C25 C 0.4609(2) 0.38775(15) 0.52924(14) 0.0328(6) Uani 1 1 d . . . 
H25 H 0.3877 0.4194 0.5279 0.039 Uiso 1 1 calc R . . 
C26 C 0.4016(2) 0.31584(15) 0.28443(13) 0.0235(5) Uani 1 1 d . . . 
C27 C 0.4726(2) 0.24097(17) 0.28063(15) 0.0328(5) Uani 1 1 d . . . 
H27 H 0.4547 0.1852 0.3023 0.039 Uiso 1 1 calc R . . 
C28 C 0.5700(2) 0.2461(2) 0.24555(16) 0.0399(6) Uani 1 1 d . . . 
H28 H 0.6190 0.1944 0.2445 0.048 Uiso 1 1 calc R . . 
C29 C 0.5951(2) 0.3257(2) 0.21257(17) 0.0412(6) Uani 1 1 d . . . 
H29 H 0.6615 0.3291 0.1885 0.049 Uiso 1 1 calc R . . 
C30 C 0.5242(2) 0.40093(18) 0.21417(15) 0.0374(6) Uani 1 1 d . . . 
H30 H 0.5411 0.4558 0.1904 0.045 Uiso 1 1 calc R . . 
C31 C 0.4283(2) 0.39677(16) 0.25033(13) 0.0286(5) Uani 1 1 d . . . 
H31 H 0.3805 0.4490 0.2520 0.034 Uiso 1 1 calc R . . 
 
loop_ 
 _atom_site_aniso_label 
 _atom_site_aniso_U_11 
 _atom_site_aniso_U_22 
 _atom_site_aniso_U_33 
 _atom_site_aniso_U_23 
 _atom_site_aniso_U_13 
 _atom_site_aniso_U_12 
Pd1 0.01789(10) 0.01804(9) 0.01521(9) 0.00064(5) 0.00412(7) 0.00010(6) 
Cl1 0.0187(3) 0.0323(3) 0.0212(3) 0.0018(2) 0.0002(2) 0.0010(2) 
Cl2 0.0235(3) 0.0271(3) 0.0138(2) -0.00200(18) 0.0061(2) -0.0022(2) 
P1 0.0169(3) 0.0176(2) 0.0164(3) -0.00012(18) 0.0045(2) 0.00008(19) 
P2 0.0184(3) 0.0205(3) 0.0172(3) -0.0004(2) 0.0040(2) -0.0001(2) 
N1 0.0175(9) 0.0260(9) 0.0168(9) 0.0012(7) 0.0042(7) -0.0012(7) 
C1 0.0219(11) 0.0202(10) 0.0183(10) 0.0012(8) 0.0050(8) 0.0029(8) 
C2 0.0276(12) 0.0234(11) 0.0342(13) 0.0025(9) 0.0127(10) -0.0009(9) 
C3 0.0423(15) 0.0196(10) 0.0355(13) 0.0004(9) 0.0155(11) 0.0010(10) 
C4 0.0377(14) 0.0322(13) 0.0285(12) -0.0023(10) 0.0107(11) 0.0133(11) 
C5 0.0253(12) 0.0337(13) 0.0415(14) -0.0025(11) 0.0121(11) 0.0046(10) 
C6 0.0228(12) 0.0253(11) 0.0326(13) -0.0020(9) 0.0085(10) 0.0000(9) 
C7 0.0185(11) 0.0200(10) 0.0219(11) 0.0009(8) 0.0060(9) -0.0001(8) 
C8 0.0267(12) 0.0258(11) 0.0218(11) 0.0003(8) 0.0064(10) -0.0013(9) 
C9 0.0318(13) 0.0314(12) 0.0310(13) 0.0046(10) 0.0126(10) -0.0042(10) 
C10 0.0370(14) 0.0231(11) 0.0401(14) 0.0024(10) 0.0139(12) -0.0072(10) 
C11 0.0419(15) 0.0246(11) 0.0368(14) -0.0054(10) 0.0141(12) -0.0074(11) 
C12 0.0342(13) 0.0239(11) 0.0259(12) -0.0010(9) 0.0118(10) -0.0007(10) 
C13 0.0209(11) 0.0199(10) 0.0193(11) -0.0020(8) 0.0054(9) 0.0005(8) 
C14 0.0180(10) 0.0221(10) 0.0236(11) -0.0002(8) 0.0067(9) 0.0001(8) 
C15 0.0240(12) 0.0239(11) 0.0250(11) -0.0004(9) 0.0039(9) 0.0037(9) 
C16 0.0268(12) 0.0248(11) 0.0334(13) -0.0077(9) 0.0059(10) -0.0014(9) 
C17 0.0297(13) 0.0202(11) 0.0413(14) 0.0003(9) 0.0162(11) -0.0004(9) 
C18 0.0310(13) 0.0269(11) 0.0306(13) 0.0076(9) 0.0106(10) 0.0017(10) 
C19 0.0250(12) 0.0252(11) 0.0270(12) 0.0000(9) 0.0096(9) 0.0005(9) 
C20 0.0216(11) 0.0250(11) 0.0202(11) 0.0041(8) 0.0026(9) -0.0030(9) 
C21 0.0242(12) 0.0317(12) 0.0324(13) 0.0040(10) 0.0035(10) 0.0007(10) 
C22 0.0232(13) 0.0422(15) 0.0395(15) 0.0118(11) -0.0020(11) -0.0035(11) 
C23 0.0300(14) 0.0513(17) 0.0394(15) 0.0134(13) -0.0082(12) -0.0169(13) 
C24 0.0442(17) 0.0414(15) 0.0378(15) -0.0088(12) -0.0030(13) -0.0114(13) 
C25 0.0320(14) 0.0315(12) 0.0316(13) -0.0054(10) 0.0024(11) -0.0019(10) 
C26 0.0186(11) 0.0366(12) 0.0139(10) -0.0026(9) 0.0017(8) -0.0033(9) 
C27 0.0305(14) 0.0391(14) 0.0319(13) 0.0028(11) 0.0140(11) 0.0035(11) 
C28 0.0286(14) 0.0566(17) 0.0379(15) -0.0039(13) 0.0147(12) 0.0060(12) 
C29 0.0276(14) 0.0651(18) 0.0355(15) -0.0057(13) 0.0164(12) -0.0086(13) 
C30 0.0317(14) 0.0520(16) 0.0306(13) -0.0012(11) 0.0117(11) -0.0157(12) 
C31 0.0252(12) 0.0371(13) 0.0242(12) -0.0011(9) 0.0076(10) -0.0063(10) 
 
_geom_special_details 
; 
 All esds (except the esd in the dihedral angle between two l.s. planes) 
 are estimated using the full covariance matrix.  The cell esds are taken 
 into account individually in the estimation of esds in distances, angles 
 and torsion angles; correlations between esds in cell parameters are only 
 used when they are defined by crystal symmetry.  An approximate (isotropic) 
 treatment of cell esds is used for estimating esds involving l.s. planes. 
; 
 
loop_ 
 _geom_bond_atom_site_label_1 
 _geom_bond_atom_site_label_2 
 _geom_bond_distance 
 _geom_bond_site_symmetry_2 
 _geom_bond_publ_flag 
Pd1 N1 2.0760(18) . ? 
Pd1 P1 2.2135(6) . ? 
Pd1 Cl1 2.3035(6) . ? 
Pd1 Cl2 2.3668(5) . ? 
P1 C7 1.805(2) . ? 
P1 C1 1.813(2) . ? 
P1 C13 1.842(2) . ? 
P2 N1 1.6192(18) . ? 
P2 C20 1.797(2) . ? 
P2 C13 1.800(2) . ? 
P2 C14 1.804(2) . ? 
N1 C26 1.422(3) . ? 
C1 C6 1.387(3) . ? 
C1 C2 1.402(3) . ? 
C2 C3 1.380(3) . ? 
C3 C4 1.383(3) . ? 
C4 C5 1.374(3) . ? 
C5 C6 1.396(3) . ? 
C7 C12 1.388(3) . ? 
C7 C8 1.404(3) . ? 
C8 C9 1.383(3) . ? 
C9 C10 1.384(3) . ? 
C10 C11 1.382(3) . ? 
C11 C12 1.395(3) . ? 
C14 C15 1.390(3) . ? 
C14 C19 1.391(3) . ? 
C15 C16 1.380(3) . ? 
C16 C17 1.379(3) . ? 
C17 C18 1.382(3) . ? 
C18 C19 1.388(3) . ? 
C20 C25 1.392(3) . ? 
C20 C21 1.406(3) . ? 
C21 C22 1.381(3) . ? 
C22 C23 1.371(4) . ? 
C23 C24 1.373(4) . ? 
C24 C25 1.384(3) . ? 
C26 C27 1.384(3) . ? 
C26 C31 1.401(3) . ? 
C27 C28 1.391(3) . ? 
C28 C29 1.369(4) . ? 
C29 C30 1.381(4) . ? 
C30 C31 1.387(3) . ? 
 
loop_ 
 _geom_angle_atom_site_label_1 
 _geom_angle_atom_site_label_2 
 _geom_angle_atom_site_label_3 
 _geom_angle 
 _geom_angle_site_symmetry_1 
 _geom_angle_site_symmetry_3 
 _geom_angle_publ_flag 
N1 Pd1 P1 88.90(5) . . ? 
N1 Pd1 Cl1 175.35(5) . . ? 
P1 Pd1 Cl1 87.25(2) . . ? 
N1 Pd1 Cl2 92.39(5) . . ? 
P1 Pd1 Cl2 174.711(19) . . ? 
Cl1 Pd1 Cl2 91.67(2) . . ? 
C7 P1 C1 108.08(10) . . ? 
C7 P1 C13 106.05(10) . . ? 
C1 P1 C13 103.43(9) . . ? 
C7 P1 Pd1 114.75(7) . . ? 
C1 P1 Pd1 117.27(7) . . ? 
C13 P1 Pd1 106.03(7) . . ? 
N1 P2 C20 112.84(10) . . ? 
N1 P2 C13 104.24(10) . . ? 
C20 P2 C13 109.90(10) . . ? 
N1 P2 C14 115.92(9) . . ? 
C20 P2 C14 106.79(10) . . ? 
C13 P2 C14 106.92(10) . . ? 
C26 N1 P2 119.88(15) . . ? 
C26 N1 Pd1 119.50(14) . . ? 
P2 N1 Pd1 115.25(10) . . ? 
C6 C1 C2 119.19(19) . . ? 
C6 C1 P1 122.06(16) . . ? 
C2 C1 P1 118.70(16) . . ? 
C3 C2 C1 120.7(2) . . ? 
C2 C3 C4 119.5(2) . . ? 
C5 C4 C3 120.7(2) . . ? 
C4 C5 C6 120.2(2) . . ? 
C1 C6 C5 119.7(2) . . ? 
C12 C7 C8 119.32(19) . . ? 
C12 C7 P1 120.83(17) . . ? 
C8 C7 P1 119.78(16) . . ? 
C9 C8 C7 120.1(2) . . ? 
C8 C9 C10 120.4(2) . . ? 
C11 C10 C9 120.0(2) . . ? 
C10 C11 C12 120.2(2) . . ? 
C7 C12 C11 120.1(2) . . ? 
P2 C13 P1 107.07(11) . . ? 
C15 C14 C19 120.37(19) . . ? 
C15 C14 P2 119.04(16) . . ? 
C19 C14 P2 120.48(16) . . ? 
C16 C15 C14 119.9(2) . . ? 
C17 C16 C15 120.1(2) . . ? 
C16 C17 C18 120.0(2) . . ? 
C17 C18 C19 120.7(2) . . ? 
C18 C19 C14 118.8(2) . . ? 
C25 C20 C21 118.8(2) . . ? 
C25 C20 P2 121.47(18) . . ? 
C21 C20 P2 119.75(17) . . ? 
C22 C21 C20 120.0(2) . . ? 
C23 C22 C21 120.4(3) . . ? 
C22 C23 C24 120.3(2) . . ? 
C23 C24 C25 120.4(2) . . ? 
C24 C25 C20 120.1(2) . . ? 
C27 C26 C31 118.3(2) . . ? 
C27 C26 N1 123.4(2) . . ? 
C31 C26 N1 118.3(2) . . ? 
C26 C27 C28 121.1(2) . . ? 
C29 C28 C27 120.0(3) . . ? 
C28 C29 C30 120.1(2) . . ? 
C29 C30 C31 120.2(2) . . ? 
C30 C31 C26 120.3(2) . . ? 
 
_diffrn_measured_fraction_theta_max    0.995 
_diffrn_reflns_theta_full              29.99 
_diffrn_measured_fraction_theta_full   0.995 
_refine_diff_density_max    1.096 
_refine_diff_density_min   -1.123 
_refine_diff_density_rms    0.092 

#END====
data_pdcl2benzimip 
# compound 5'e
 
_audit_creation_method            SHELXL-97 
_chemical_name_systematic 
; 
 ? 
; 
_chemical_name_common             ? 
_chemical_melting_point           ? 
_chemical_formula_moiety          ? 
_chemical_formula_sum 
 'C33 H31 Br0.16 Cl1.84 N P2 Pd' 
_chemical_formula_weight          688.05 
 
loop_ 
 _atom_type_symbol 
 _atom_type_description 
 _atom_type_scat_dispersion_real 
 _atom_type_scat_dispersion_imag 
 _atom_type_scat_source 
 'C'  'C'   0.0033   0.0016 
 'International Tables Vol C Tables 4.2.6.8 and 6.1.1.4' 
 'H'  'H'   0.0000   0.0000 
 'International Tables Vol C Tables 4.2.6.8 and 6.1.1.4' 
 'N'  'N'   0.0061   0.0033 
 'International Tables Vol C Tables 4.2.6.8 and 6.1.1.4' 
 'P'  'P'   0.1023   0.0942 
 'International Tables Vol C Tables 4.2.6.8 and 6.1.1.4' 
 'Cl'  'Cl'   0.1484   0.1585 
 'International Tables Vol C Tables 4.2.6.8 and 6.1.1.4' 
 'Pd'  'Pd'  -0.9988   1.0072 
 'International Tables Vol C Tables 4.2.6.8 and 6.1.1.4' 
 'Br'  'Br'  -0.2901   2.4595 
 'International Tables Vol C Tables 4.2.6.8 and 6.1.1.4' 
 
_symmetry_cell_setting            'Orthorhombic'
_symmetry_space_group_name_H-M    'P212121     '
 
loop_ 
 _symmetry_equiv_pos_as_xyz 
 'x, y, z' 
 '-x+1/2, -y, z+1/2' 
 'x+1/2, -y+1/2, -z' 
 '-x, y+1/2, -z+1/2' 
 
_cell_length_a                    12.3220(10) 
_cell_length_b                    13.6670(10) 
_cell_length_c                    17.6790(10) 
_cell_angle_alpha                 90.00 
_cell_angle_beta                  90.00 
_cell_angle_gamma                 90.00 
_cell_volume                      2977.2(4) 
_cell_formula_units_Z             4 
_cell_measurement_temperature     150.0(1)
_cell_measurement_reflns_used     251
_cell_measurement_theta_min       3.0
_cell_measurement_theta_max       20.0
 
_exptl_crystal_description        'plate'
_exptl_crystal_colour             'orange'
_exptl_crystal_size_max           0.12 
_exptl_crystal_size_mid           0.10 
_exptl_crystal_size_min           0.04 
_exptl_crystal_density_meas       ? 
_exptl_crystal_density_diffrn     1.535 
_exptl_crystal_density_method     'not measured' 
_exptl_crystal_F_000              1396 
_exptl_absorpt_coefficient_mu     1.138 
_exptl_absorpt_correction_type    'multi-scan'
_exptl_absorpt_correction_T_min   0.8755 
_exptl_absorpt_correction_T_max   0.9559 
_exptl_absorpt_process_details    ? 
 
_exptl_special_details 
; 
 ? 
; 
 
_diffrn_ambient_temperature       150.0(1)
_diffrn_radiation_wavelength      0.71069 
_diffrn_radiation_type            MoK\a 
_diffrn_radiation_source          'fine-focus sealed tube' 
_diffrn_radiation_monochromator   graphite 
_diffrn_measurement_device_type   'KappaCCD'
_diffrn_measurement_method        'phi and omega scans'
_diffrn_detector_area_resol_mean  ? 
_diffrn_standards_number          ? 
_diffrn_standards_interval_count  ? 
_diffrn_standards_interval_time   ? 
_diffrn_standards_decay_%         ? 
_diffrn_reflns_number             8674 
_diffrn_reflns_av_R_equivalents   0.0000 
_diffrn_reflns_av_sigmaI/netI     0.0643 
_diffrn_reflns_limit_h_min        -17 
_diffrn_reflns_limit_h_max        17 
_diffrn_reflns_limit_k_min        -19 
_diffrn_reflns_limit_k_max        19 
_diffrn_reflns_limit_l_min        -24 
_diffrn_reflns_limit_l_max        24 
_diffrn_reflns_theta_min          3.20 
_diffrn_reflns_theta_max          30.03 
_reflns_number_total              8674 
_reflns_number_gt                 6885 
_reflns_threshold_expression      >2sigma(I) 
 
_computing_data_collection        ? 
_computing_cell_refinement        ? 
_computing_data_reduction         ? 
_computing_structure_solution     'SHELXS-97 (Sheldrick, 1990)' 
_computing_structure_refinement   'SHELXL-97 (Sheldrick, 1997)' 
_computing_molecular_graphics     ? 
_computing_publication_material   ? 
 
_refine_special_details 
; 
 Refinement of F^2^ against ALL reflections.  The weighted R-factor wR and 
 goodness of fit S are based on F^2^, conventional R-factors R are based 
 on F, with F set to zero for negative F^2^. The threshold expression of 
 F^2^ > 2sigma(F^2^) is used only for calculating R-factors(gt) etc. and is 
 not relevant to the choice of reflections for refinement.  R-factors based 
 on F^2^ are statistically about twice as large as those based on F, and R- 
 factors based on ALL data will be even larger. 
; 
 
_refine_ls_structure_factor_coef  Fsqd  
_refine_ls_matrix_type            full 
_refine_ls_weighting_scheme       calc  
_refine_ls_weighting_details 
 'calc w=1/[\s^2^(Fo^2^)+(0.0457P)^2^+0.0000P] where P=(Fo^2^+2Fc^2^)/3' 
_atom_sites_solution_primary      direct 
_atom_sites_solution_secondary    difmap 
_atom_sites_solution_hydrogens    geom 
_refine_ls_hydrogen_treatment     mixed 
_refine_ls_extinction_method      SHELXL 
_refine_ls_extinction_coef        0.0015(3) 
_refine_ls_extinction_expression 
 'Fc^*^=kFc[1+0.001xFc^2^\l^3^/sin(2\q)]^-1/4^' 
_refine_ls_abs_structure_details 
 'Flack H D (1983), Acta Cryst. A39, 876-881' 
_refine_ls_abs_structure_Flack    0.01(2) 
_refine_ls_number_reflns          8674 
_refine_ls_number_parameters      364 
_refine_ls_number_restraints      0 
_refine_ls_R_factor_all           0.0604 
_refine_ls_R_factor_gt            0.0398 
_refine_ls_wR_factor_ref          0.0930 
_refine_ls_wR_factor_gt           0.0854 
_refine_ls_goodness_of_fit_ref    1.005 
_refine_ls_restrained_S_all       1.005 
_refine_ls_shift/su_max           0.001 
_refine_ls_shift/su_mean          0.000 
 
loop_ 
 _atom_site_label 
 _atom_site_type_symbol 
 _atom_site_fract_x 
 _atom_site_fract_y 
 _atom_site_fract_z 
 _atom_site_U_iso_or_equiv 
 _atom_site_adp_type 
 _atom_site_occupancy 
 _atom_site_symmetry_multiplicity 
 _atom_site_calc_flag 
 _atom_site_refinement_flags 
 _atom_site_disorder_assembly 
 _atom_site_disorder_group 
Pd1 Pd 0.183974(17) 0.00340(2) 0.275228(12) 0.01929(7) Uani 1 1 d . . . 
Cl1 Cl 0.23339(6) -0.01613(7) 0.40467(4) 0.02347(19) Uani 1 1 d . A . 
Br2 Br -0.0039(16) -0.0003(10) 0.3134(12) 0.0216(17) Uani 0.163(3) 1 d P A 1 
Cl2 Cl 0.0010(8) -0.0020(5) 0.3064(6) 0.0255(10) Uani 0.837(3) 1 d P A 2 
P1 P 0.35641(7) -0.05549(7) 0.16670(5) 0.01976(18) Uani 1 1 d . A . 
P2 P 0.13562(6) 0.00916(8) 0.15291(4) 0.02000(17) Uani 1 1 d . A . 
N1 N 0.34755(19) 0.0079(2) 0.24310(13) 0.0189(5) Uani 1 1 d . A . 
C1 C 0.2610(2) -0.0081(3) 0.09875(16) 0.0214(6) Uani 1 1 d . . . 
H1A H 0.2497 -0.0552 0.0569 0.026 Uiso 1 1 calc R A . 
H1B H 0.2867 0.0547 0.0775 0.026 Uiso 1 1 calc R . . 
C2 C 0.4891(3) -0.0540(3) 0.12272(18) 0.0219(7) Uani 1 1 d . . . 
C3 C 0.5808(3) -0.0794(3) 0.1638(2) 0.0292(8) Uani 1 1 d . A . 
H3 H 0.5743 -0.1011 0.2147 0.035 Uiso 1 1 calc R . . 
C4 C 0.6819(3) -0.0728(3) 0.1298(2) 0.0344(9) Uani 1 1 d . . . 
H4 H 0.7450 -0.0887 0.1581 0.041 Uiso 1 1 calc R A . 
C5 C 0.6919(3) -0.0437(3) 0.0562(2) 0.0353(9) Uani 1 1 d . A . 
H5 H 0.7619 -0.0382 0.0339 0.042 Uiso 1 1 calc R . . 
C6 C 0.6004(3) -0.0223(3) 0.0139(2) 0.0323(9) Uani 1 1 d . . . 
H6 H 0.6074 -0.0050 -0.0379 0.039 Uiso 1 1 calc R A . 
C7 C 0.4993(3) -0.0260(3) 0.04686(19) 0.0272(8) Uani 1 1 d . A . 
H7 H 0.4366 -0.0097 0.0182 0.033 Uiso 1 1 calc R . . 
C8 C 0.3201(3) -0.1795(2) 0.18805(19) 0.0208(7) Uani 1 1 d . . . 
C9 C 0.2801(3) -0.2415(3) 0.1320(2) 0.0271(8) Uani 1 1 d . A . 
H9 H 0.2721 -0.2183 0.0816 0.033 Uiso 1 1 calc R . . 
C10 C 0.2520(3) -0.3367(3) 0.1497(2) 0.0343(10) Uani 1 1 d . . . 
H10 H 0.2235 -0.3784 0.1116 0.041 Uiso 1 1 calc R A . 
C11 C 0.2652(3) -0.3715(3) 0.2222(2) 0.0329(9) Uani 1 1 d . A . 
H11 H 0.2460 -0.4371 0.2339 0.039 Uiso 1 1 calc R . . 
C12 C 0.3062(3) -0.3111(3) 0.2780(2) 0.0317(8) Uani 1 1 d . . . 
H12 H 0.3162 -0.3355 0.3278 0.038 Uiso 1 1 calc R A . 
C13 C 0.3329(3) -0.2146(3) 0.2613(2) 0.0254(8) Uani 1 1 d . A . 
H13 H 0.3599 -0.1728 0.2998 0.030 Uiso 1 1 calc R . . 
C14 C 0.0510(3) -0.0910(3) 0.12109(19) 0.0230(8) Uani 1 1 d . . . 
C15 C 0.0169(3) -0.0933(3) 0.0454(2) 0.0321(9) Uani 1 1 d . A . 
H15 H 0.0329 -0.0402 0.0126 0.038 Uiso 1 1 calc R . . 
C16 C -0.0400(4) -0.1729(3) 0.0189(2) 0.0417(10) Uani 1 1 d . . . 
H16 H -0.0629 -0.1746 -0.0324 0.050 Uiso 1 1 calc R A . 
C17 C -0.0638(4) -0.2497(3) 0.0660(2) 0.0386(10) Uani 1 1 d . A . 
H17 H -0.1038 -0.3038 0.0471 0.046 Uiso 1 1 calc R . . 
C18 C -0.0304(3) -0.2493(3) 0.1402(2) 0.0314(9) Uani 1 1 d . . . 
H18 H -0.0467 -0.3029 0.1724 0.038 Uiso 1 1 calc R A . 
C19 C 0.0272(3) -0.1696(3) 0.1675(2) 0.0263(8) Uani 1 1 d . A . 
H19 H 0.0507 -0.1690 0.2187 0.032 Uiso 1 1 calc R . . 
C20 C 0.0755(3) 0.1202(3) 0.1148(2) 0.0217(8) Uani 1 1 d . . . 
C21 C 0.1172(3) 0.1661(3) 0.05155(19) 0.0265(8) Uani 1 1 d . A . 
H21 H 0.1782 0.1388 0.0263 0.032 Uiso 1 1 calc R . . 
C22 C 0.0709(3) 0.2517(3) 0.0247(2) 0.0315(9) Uani 1 1 d . . . 
H22 H 0.1007 0.2835 -0.0183 0.038 Uiso 1 1 calc R A . 
C23 C -0.0196(3) 0.2909(3) 0.0609(2) 0.0313(9) Uani 1 1 d . A . 
H23 H -0.0522 0.3492 0.0424 0.038 Uiso 1 1 calc R . . 
C24 C -0.0615(3) 0.2446(3) 0.1236(2) 0.0320(9) Uani 1 1 d . . . 
H24 H -0.1229 0.2716 0.1485 0.038 Uiso 1 1 calc R A . 
C25 C -0.0156(3) 0.1603(3) 0.1504(2) 0.0271(8) Uani 1 1 d . A . 
H25 H -0.0458 0.1289 0.1934 0.033 Uiso 1 1 calc R . . 
C26 C 0.4122(3) 0.0999(3) 0.24993(19) 0.0226(7) Uani 1 1 d . . . 
H26 H 0.4827 0.0878 0.2235 0.027 Uiso 1 1 calc R A . 
C27 C 0.4392(3) 0.1207(3) 0.3315(2) 0.0299(9) Uani 1 1 d . A . 
H27A H 0.3721 0.1322 0.3599 0.045 Uiso 1 1 calc R . . 
H27B H 0.4855 0.1789 0.3345 0.045 Uiso 1 1 calc R . . 
H27C H 0.4777 0.0646 0.3532 0.045 Uiso 1 1 calc R . . 
C28 C 0.3600(3) 0.1885(2) 0.21109(19) 0.0223(7) Uani 1 1 d . A . 
C29 C 0.4087(3) 0.2289(3) 0.1469(2) 0.0317(9) Uani 1 1 d . . . 
H29 H 0.4720 0.1995 0.1263 0.038 Uiso 1 1 calc R A . 
C30 C 0.3649(4) 0.3117(3) 0.1129(2) 0.0386(10) Uani 1 1 d . A . 
H30 H 0.3993 0.3398 0.0700 0.046 Uiso 1 1 calc R . . 
C31 C 0.2712(4) 0.3532(3) 0.1417(3) 0.0383(10) Uani 1 1 d . . . 
H31 H 0.2410 0.4097 0.1186 0.046 Uiso 1 1 calc R A . 
C32 C 0.2218(3) 0.3121(3) 0.2043(2) 0.0343(9) Uani 1 1 d . A . 
H32 H 0.1565 0.3397 0.2234 0.041 Uiso 1 1 calc R . . 
C33 C 0.2664(3) 0.2315(3) 0.2391(2) 0.0283(8) Uani 1 1 d . . . 
H33 H 0.2326 0.2050 0.2829 0.034 Uiso 1 1 calc R A . 
 
loop_ 
 _atom_site_aniso_label 
 _atom_site_aniso_U_11 
 _atom_site_aniso_U_22 
 _atom_site_aniso_U_33 
 _atom_site_aniso_U_23 
 _atom_site_aniso_U_13 
 _atom_site_aniso_U_12 
Pd1 0.01980(11) 0.02154(12) 0.01653(11) 0.00015(12) 0.00105(8) -0.00032(13) 
Cl1 0.0235(4) 0.0355(5) 0.0114(3) 0.0013(3) 0.0000(3) -0.0060(4) 
Br2 0.023(3) 0.019(3) 0.022(3) -0.002(2) 0.0070(19) -0.002(3) 
Cl2 0.0222(13) 0.0297(17) 0.0246(18) -0.0002(13) 0.0050(12) 0.0028(14) 
P1 0.0189(4) 0.0222(5) 0.0182(4) 0.0012(3) 0.0006(4) 0.0022(4) 
P2 0.0191(4) 0.0222(5) 0.0187(3) 0.0009(4) 0.0012(3) 0.0007(4) 
N1 0.0169(11) 0.0214(14) 0.0184(11) 0.0019(12) 0.0012(9) -0.0031(13) 
C1 0.0228(14) 0.0255(17) 0.0158(13) -0.0006(16) 0.0009(11) 0.0012(17) 
C2 0.0217(17) 0.0215(18) 0.0225(17) 0.0006(14) 0.0004(14) 0.0033(14) 
C3 0.0248(18) 0.036(2) 0.0263(19) 0.0039(16) 0.0022(16) 0.0048(16) 
C4 0.0243(18) 0.044(2) 0.035(2) 0.0028(17) -0.0032(18) 0.0105(18) 
C5 0.0217(18) 0.047(2) 0.037(2) 0.0045(18) 0.0083(17) 0.0050(17) 
C6 0.0301(19) 0.039(3) 0.0275(17) 0.0065(16) 0.0112(15) 0.0026(17) 
C7 0.0227(16) 0.033(2) 0.0262(17) 0.0019(14) -0.0016(14) 0.0033(14) 
C8 0.0216(17) 0.0187(17) 0.0221(17) -0.0007(13) -0.0015(15) 0.0061(15) 
C9 0.0298(19) 0.029(2) 0.0231(17) -0.0043(15) -0.0031(15) 0.0055(16) 
C10 0.033(2) 0.025(2) 0.044(3) -0.0069(17) -0.008(2) -0.0019(17) 
C11 0.0273(19) 0.0232(18) 0.048(2) 0.0007(18) 0.0038(19) 0.0023(16) 
C12 0.031(2) 0.033(2) 0.032(2) 0.0085(17) 0.0033(18) 0.0055(17) 
C13 0.0224(19) 0.0254(19) 0.0284(19) -0.0016(14) 0.0019(15) 0.0009(14) 
C14 0.0240(18) 0.026(2) 0.0193(17) 0.0002(14) 0.0020(15) -0.0010(15) 
C15 0.036(2) 0.036(2) 0.0249(19) 0.0027(16) 0.0019(17) -0.0120(18) 
C16 0.046(3) 0.050(3) 0.029(2) -0.0049(19) -0.0050(19) -0.014(2) 
C17 0.038(2) 0.032(2) 0.045(2) -0.012(2) 0.0053(19) -0.0122(19) 
C18 0.030(2) 0.023(2) 0.041(2) 0.0041(17) 0.0087(18) -0.0002(17) 
C19 0.0268(19) 0.026(2) 0.0262(19) 0.0024(15) -0.0001(16) -0.0005(16) 
C20 0.0198(18) 0.0218(18) 0.0234(18) 0.0037(14) -0.0064(14) 0.0035(14) 
C21 0.0275(19) 0.029(2) 0.0226(17) -0.0009(14) -0.0011(15) 0.0060(16) 
C22 0.036(2) 0.029(2) 0.0292(19) 0.0089(17) 0.0006(17) 0.0008(17) 
C23 0.043(2) 0.022(2) 0.029(2) 0.0023(16) -0.0055(18) 0.0050(17) 
C24 0.034(2) 0.028(2) 0.034(2) -0.0027(17) 0.0005(18) 0.0102(17) 
C25 0.027(2) 0.028(2) 0.027(2) 0.0049(15) 0.0009(16) 0.0029(16) 
C26 0.0199(16) 0.0255(19) 0.0224(17) -0.0005(14) -0.0001(14) -0.0026(14) 
C27 0.031(2) 0.030(2) 0.0290(19) -0.0025(16) -0.0049(17) -0.0084(16) 
C28 0.0228(17) 0.0217(17) 0.0225(18) -0.0040(13) -0.0002(15) -0.0061(15) 
C29 0.034(2) 0.032(2) 0.0296(19) -0.0023(16) 0.0045(17) 0.0047(17) 
C30 0.049(3) 0.035(2) 0.032(2) 0.0108(17) 0.000(2) 0.003(2) 
C31 0.045(3) 0.027(2) 0.043(2) -0.0037(19) -0.014(2) 0.0065(19) 
C32 0.031(2) 0.030(2) 0.041(2) -0.0062(17) -0.0089(18) 0.0052(18) 
C33 0.0270(19) 0.028(2) 0.030(2) -0.0030(15) 0.0011(16) -0.0022(16) 
 
_geom_special_details 
; 
 All esds (except the esd in the dihedral angle between two l.s. planes) 
 are estimated using the full covariance matrix.  The cell esds are taken 
 into account individually in the estimation of esds in distances, angles 
 and torsion angles; correlations between esds in cell parameters are only 
 used when they are defined by crystal symmetry.  An approximate (isotropic) 
 treatment of cell esds is used for estimating esds involving l.s. planes. 
; 
 
loop_ 
 _geom_bond_atom_site_label_1 
 _geom_bond_atom_site_label_2 
 _geom_bond_distance 
 _geom_bond_site_symmetry_2 
 _geom_bond_publ_flag 
Pd1 N1 2.095(2) . ? 
Pd1 P2 2.2444(8) . ? 
Pd1 Cl2 2.323(9) . ? 
Pd1 Cl1 2.3830(8) . ? 
Pd1 Br2 2.41(2) . ? 
Pd1 P1 2.9739(9) . ? 
P1 N1 1.608(3) . ? 
P1 C8 1.793(3) . ? 
P1 C1 1.801(3) . ? 
P1 C2 1.810(3) . ? 
P2 C14 1.810(4) . ? 
P2 C20 1.819(4) . ? 
P2 C1 1.833(3) . ? 
N1 C26 1.494(4) . ? 
C2 C3 1.387(5) . ? 
C2 C7 1.400(5) . ? 
C3 C4 1.386(5) . ? 
C4 C5 1.367(5) . ? 
C5 C6 1.384(5) . ? 
C6 C7 1.376(5) . ? 
C8 C13 1.390(5) . ? 
C8 C9 1.394(5) . ? 
C9 C10 1.382(6) . ? 
C10 C11 1.376(6) . ? 
C11 C12 1.383(5) . ? 
C12 C13 1.391(5) . ? 
C14 C19 1.383(5) . ? 
C14 C15 1.403(5) . ? 
C15 C16 1.375(5) . ? 
C16 C17 1.372(6) . ? 
C17 C18 1.374(6) . ? 
C18 C19 1.387(5) . ? 
C20 C21 1.382(5) . ? 
C20 C25 1.398(5) . ? 
C21 C22 1.385(5) . ? 
C22 C23 1.393(5) . ? 
C23 C24 1.377(5) . ? 
C24 C25 1.368(5) . ? 
C26 C27 1.507(5) . ? 
C26 C28 1.534(5) . ? 
C28 C33 1.386(5) . ? 
C28 C29 1.397(5) . ? 
C29 C30 1.390(5) . ? 
C30 C31 1.384(6) . ? 
C31 C32 1.381(6) . ? 
C32 C33 1.377(5) . ? 
 
loop_ 
 _geom_angle_atom_site_label_1 
 _geom_angle_atom_site_label_2 
 _geom_angle_atom_site_label_3 
 _geom_angle 
 _geom_angle_site_symmetry_1 
 _geom_angle_site_symmetry_3 
 _geom_angle_publ_flag 
N1 Pd1 P2 89.61(7) . . ? 
N1 Pd1 Cl2 178.0(3) . . ? 
P2 Pd1 Cl2 88.4(3) . . ? 
N1 Pd1 Cl1 91.02(7) . . ? 
P2 Pd1 Cl1 175.55(4) . . ? 
Cl2 Pd1 Cl1 91.0(3) . . ? 
N1 Pd1 Br2 179.3(4) . . ? 
P2 Pd1 Br2 90.9(5) . . ? 
Cl2 Pd1 Br2 2.6(7) . . ? 
Cl1 Pd1 Br2 88.5(5) . . ? 
N1 Pd1 P1 31.31(7) . . ? 
P2 Pd1 P1 65.01(3) . . ? 
Cl2 Pd1 P1 146.9(2) . . ? 
Cl1 Pd1 P1 114.00(3) . . ? 
Br2 Pd1 P1 149.4(4) . . ? 
N1 P1 C8 108.39(15) . . ? 
N1 P1 C1 108.79(15) . . ? 
C8 P1 C1 108.48(17) . . ? 
N1 P1 C2 114.57(15) . . ? 
C8 P1 C2 109.06(16) . . ? 
C1 P1 C2 107.40(15) . . ? 
N1 P1 Pd1 42.60(9) . . ? 
C8 P1 Pd1 86.65(11) . . ? 
C1 P1 Pd1 82.33(10) . . ? 
C2 P1 Pd1 156.81(12) . . ? 
C14 P2 C20 106.35(16) . . ? 
C14 P2 C1 103.02(16) . . ? 
C20 P2 C1 104.93(17) . . ? 
C14 P2 Pd1 115.20(12) . . ? 
C20 P2 Pd1 119.63(12) . . ? 
C1 P2 Pd1 105.96(10) . . ? 
C26 N1 P1 119.0(2) . . ? 
C26 N1 Pd1 121.1(2) . . ? 
P1 N1 Pd1 106.09(13) . . ? 
P1 C1 P2 104.37(15) . . ? 
C3 C2 C7 119.8(3) . . ? 
C3 C2 P1 120.5(2) . . ? 
C7 C2 P1 119.7(3) . . ? 
C4 C3 C2 119.2(3) . . ? 
C5 C4 C3 120.9(4) . . ? 
C4 C5 C6 120.1(4) . . ? 
C7 C6 C5 120.1(3) . . ? 
C6 C7 C2 119.8(3) . . ? 
C13 C8 C9 119.6(3) . . ? 
C13 C8 P1 119.6(3) . . ? 
C9 C8 P1 120.8(3) . . ? 
C10 C9 C8 119.9(3) . . ? 
C11 C10 C9 120.5(4) . . ? 
C10 C11 C12 120.1(4) . . ? 
C11 C12 C13 120.0(3) . . ? 
C8 C13 C12 119.9(3) . . ? 
C19 C14 C15 119.0(4) . . ? 
C19 C14 P2 121.7(3) . . ? 
C15 C14 P2 119.1(3) . . ? 
C16 C15 C14 119.7(4) . . ? 
C17 C16 C15 120.5(4) . . ? 
C16 C17 C18 120.8(4) . . ? 
C17 C18 C19 119.2(4) . . ? 
C14 C19 C18 120.8(4) . . ? 
C21 C20 C25 119.0(3) . . ? 
C21 C20 P2 121.8(3) . . ? 
C25 C20 P2 119.2(3) . . ? 
C20 C21 C22 120.5(3) . . ? 
C21 C22 C23 119.8(3) . . ? 
C24 C23 C22 119.6(4) . . ? 
C25 C24 C23 120.7(4) . . ? 
C24 C25 C20 120.4(4) . . ? 
N1 C26 C27 110.7(3) . . ? 
N1 C26 C28 113.9(3) . . ? 
C27 C26 C28 111.8(3) . . ? 
C33 C28 C29 118.7(3) . . ? 
C33 C28 C26 121.6(3) . . ? 
C29 C28 C26 119.7(3) . . ? 
C30 C29 C28 120.4(4) . . ? 
C31 C30 C29 119.9(4) . . ? 
C32 C31 C30 119.8(4) . . ? 
C33 C32 C31 120.5(4) . . ? 
C32 C33 C28 120.8(4) . . ? 
 
_diffrn_measured_fraction_theta_max    0.998 
_diffrn_reflns_theta_full              30.03 
_diffrn_measured_fraction_theta_full   0.998 
_refine_diff_density_max    0.999 
_refine_diff_density_min   -1.117 
_refine_diff_density_rms    0.103 
#END====
data_ptiminop2 
# compound 6e

 _audit_creation_method            SHELXL-97 
 _chemical_name_systematic 
; 
  ? 
; 
 _chemical_name_common             ? 
 _chemical_melting_point           ? 
 _chemical_formula_moiety          ? 
 _chemical_formula_sum 
  'C38 H41 Br Cl3 N O P2 Pt' 
 _chemical_formula_weight          971.01 

 loop_ 
  _atom_type_symbol 
  _atom_type_description 
  _atom_type_scat_dispersion_real 
  _atom_type_scat_dispersion_imag 
  _atom_type_scat_source 
  'C'  'C'   0.0033   0.0016 
  'International Tables Vol C Tables 4.2.6.8 and 6.1.1.4' 
  'H'  'H'   0.0000   0.0000 
  'International Tables Vol C Tables 4.2.6.8 and 6.1.1.4' 
  'N'  'N'   0.0061   0.0033 
  'International Tables Vol C Tables 4.2.6.8 and 6.1.1.4' 
  'O'  'O'   0.0106   0.0060 
  'International Tables Vol C Tables 4.2.6.8 and 6.1.1.4' 
  'P'  'P'   0.1023   0.0942 
  'International Tables Vol C Tables 4.2.6.8 and 6.1.1.4' 
  'Cl'  'Cl'   0.1484   0.1585 
  'International Tables Vol C Tables 4.2.6.8 and 6.1.1.4' 
  'Br'  'Br'  -0.2901   2.4595 
  'International Tables Vol C Tables 4.2.6.8 and 6.1.1.4' 
  'Pt'  'Pt'  -1.7033   8.3905 
  'International Tables Vol C Tables 4.2.6.8 and 6.1.1.4' 

 _symmetry_cell_setting            'Monoclinic'
 _symmetry_space_group_name_H-M    'P21     '

 loop_ 
  _symmetry_equiv_pos_as_xyz 
  'x, y, z' 
  '-x, y+1/2, -z' 

 _cell_length_a                    8.5010(10) 
 _cell_length_b                    16.3370(10) 
 _cell_length_c                    13.5450(10) 
 _cell_angle_alpha                 90.00 
 _cell_angle_beta                  94.0500(10) 
 _cell_angle_gamma                 90.00 
 _cell_volume                      1876.4(3) 
 _cell_formula_units_Z             2 
 _cell_measurement_temperature     150.0(1)
 _cell_measurement_reflns_used     251
 _cell_measurement_theta_min       3.0
 _cell_measurement_theta_max       20.0

 _exptl_crystal_description        'plate'
 _exptl_crystal_colour             'yellow'
 _exptl_crystal_size_max           0.20 
 _exptl_crystal_size_mid           0.18 
 _exptl_crystal_size_min           0.05 
 _exptl_crystal_density_meas       ? 
 _exptl_crystal_density_diffrn     1.719 
 _exptl_crystal_density_method     'not measured' 
 _exptl_crystal_F_000              956 
 _exptl_absorpt_coefficient_mu     5.134 
 _exptl_absorpt_correction_type    'multi-scan'
 _exptl_absorpt_correction_T_min   0.4266 
 _exptl_absorpt_correction_T_max   0.7834 
 _exptl_absorpt_process_details    ? 

 _exptl_special_details 
; 
  ? 
; 

 _diffrn_ambient_temperature       150.0(1)
 _diffrn_radiation_wavelength      0.71069 
 _diffrn_radiation_type            MoK\a 
 _diffrn_radiation_source          'fine-focus sealed tube' 
 _diffrn_radiation_monochromator   graphite 
 _diffrn_measurement_device_type   'KappaCCD'
 _diffrn_measurement_method        'phi and omega scans'
 _diffrn_detector_area_resol_mean  ? 
 _diffrn_standards_number          ? 
 _diffrn_standards_interval_count  ? 
 _diffrn_standards_interval_time   ? 
 _diffrn_standards_decay_%         ? 
 _diffrn_reflns_number             10110 
 _diffrn_reflns_av_R_equivalents   0.0000 
 _diffrn_reflns_av_sigmaI/netI     0.0512 
 _diffrn_reflns_limit_h_min        -11 
 _diffrn_reflns_limit_h_max        11 
 _diffrn_reflns_limit_k_min        -22 
 _diffrn_reflns_limit_k_max        20 
 _diffrn_reflns_limit_l_min        -19 
 _diffrn_reflns_limit_l_max        19 
 _diffrn_reflns_theta_min          2.91 
 _diffrn_reflns_theta_max          30.02 
 _reflns_number_total              10110 
 _reflns_number_gt                 9116 
 _reflns_threshold_expression      >2sigma(I) 

 _computing_data_collection        ? 
 _computing_cell_refinement        ? 
 _computing_data_reduction         ? 
 _computing_structure_solution     'SHELXS-97 (Sheldrick, 1990)' 
 _computing_structure_refinement   'SHELXL-97 (Sheldrick, 1997)' 
 _computing_molecular_graphics     ? 
 _computing_publication_material   ? 

 _refine_special_details 
; 
  Refinement of F^2^ against ALL reflections.  The weighted R-factor wR and 
  goodness of fit S are based on F^2^, conventional R-factors R are based 
  on F, with F set to zero for negative F^2^. The threshold expression of 
  F^2^ > 2sigma(F^2^) is used only for calculating R-factors(gt) etc. and is 
  not relevant to the choice of reflections for refinement.  R-factors based 
  on F^2^ are statistically about twice as large as those based on F, and R- 
  factors based on ALL data will be even larger. 
; 

 _refine_ls_structure_factor_coef  Fsqd  
 _refine_ls_matrix_type            full 
 _refine_ls_weighting_scheme       calc  
 _refine_ls_weighting_details 
  'calc w=1/[\s^2^(Fo^2^)+(0.0641P)^2^+0.0000P] where P=(Fo^2^+2Fc^2^)/3' 
 _atom_sites_solution_primary      direct 
 _atom_sites_solution_secondary    difmap 
 _atom_sites_solution_hydrogens    geom 
 _refine_ls_hydrogen_treatment     mixed 
 _refine_ls_extinction_method      none 
 _refine_ls_extinction_coef        ? 
 _refine_ls_abs_structure_details 
  'Flack H D (1983), Acta Cryst. A39, 876-881' 
 _refine_ls_abs_structure_Flack    0.016(5) 
 _refine_ls_number_reflns          10110 
 _refine_ls_number_parameters      400 
 _refine_ls_number_restraints      1 
 _refine_ls_R_factor_all           0.0456 
 _refine_ls_R_factor_gt            0.0390 
 _refine_ls_wR_factor_ref          0.1001 
 _refine_ls_wR_factor_gt           0.0963 
 _refine_ls_goodness_of_fit_ref    1.005 
 _refine_ls_restrained_S_all       1.005 
 _refine_ls_shift/su_max           0.000 
 _refine_ls_shift/su_mean          0.000 

 loop_ 
  _atom_site_label 
  _atom_site_type_symbol 
  _atom_site_fract_x 
  _atom_site_fract_y 
  _atom_site_fract_z 
  _atom_site_U_iso_or_equiv 
  _atom_site_adp_type 
  _atom_site_occupancy 
  _atom_site_symmetry_multiplicity 
  _atom_site_calc_flag 
  _atom_site_refinement_flags 
  _atom_site_disorder_assembly 
  _atom_site_disorder_group 
 Pt1 Pt -0.021843(17) 0.201370(14) 0.042070(12) 0.02037(5) Uani 1 1 d . . . 
 Cl1 Cl -0.26367(14) 0.16319(9) -0.04228(10) 0.0257(3) Uani 1 1 d . . . 
 Br1 Br -0.15415(6) 0.20901(7) 0.19591(4) 0.03502(16) Uani 1 1 d . . . 
 P1 P 0.26385(15) 0.17393(9) -0.07742(10) 0.0198(2) Uani 1 1 d . . . 
 P2 P 0.20854(15) 0.22616(8) 0.12124(10) 0.0207(3) Uani 1 1 d . . . 
 N1 N 0.0843(4) 0.2032(5) -0.0925(3) 0.0221(7) Uani 1 1 d . . . 
 C1 C 0.3557(6) 0.2291(4) 0.0278(4) 0.0238(10) Uani 1 1 d . . . 
 H1A H 0.3794 0.2862 0.0095 0.029 Uiso 1 1 calc R . . 
 H1B H 0.4548 0.2020 0.0528 0.029 Uiso 1 1 calc R . . 
 C2 C 0.0007(6) 0.2432(4) -0.1769(4) 0.0254(11) Uani 1 1 d . . . 
 H2 H -0.1072 0.2559 -0.1561 0.030 Uiso 1 1 calc R . . 
 C3 C -0.0230(7) 0.1858(4) -0.2657(4) 0.0329(16) Uani 1 1 d . . . 
 H3A H 0.0778 0.1778 -0.2952 0.049 Uiso 1 1 calc R . . 
 H3B H -0.0995 0.2099 -0.3149 0.049 Uiso 1 1 calc R . . 
 H3C H -0.0625 0.1329 -0.2439 0.049 Uiso 1 1 calc R . . 
 C4 C 0.0761(6) 0.3265(4) -0.2007(4) 0.0267(11) Uani 1 1 d . . . 
 C5 C 0.0951(7) 0.3835(4) -0.1242(4) 0.0296(12) Uani 1 1 d . . . 
 H5 H 0.0625 0.3698 -0.0606 0.036 Uiso 1 1 calc R . . 
 C6 C 0.1606(8) 0.4598(4) -0.1391(6) 0.0413(16) Uani 1 1 d . . . 
 H6 H 0.1730 0.4981 -0.0864 0.050 Uiso 1 1 calc R . . 
 C7 C 0.2080(8) 0.4795(5) -0.2324(7) 0.0461(18) Uani 1 1 d . . . 
 H7 H 0.2542 0.5314 -0.2430 0.055 Uiso 1 1 calc R . . 
 C8 C 0.1887(9) 0.4246(5) -0.3095(7) 0.056(2) Uani 1 1 d . . . 
 H8 H 0.2203 0.4394 -0.3730 0.067 Uiso 1 1 calc R . . 
 C9 C 0.1218(8) 0.3462(4) -0.2951(5) 0.0352(13) Uani 1 1 d . . . 
 H9 H 0.1085 0.3082 -0.3481 0.042 Uiso 1 1 calc R . . 
 C10 C 0.3774(5) 0.1912(5) -0.1829(4) 0.0216(12) Uani 1 1 d . . . 
 C11 C 0.4441(7) 0.2677(4) -0.1982(5) 0.0323(13) Uani 1 1 d . . . 
 H11 H 0.4293 0.3114 -0.1535 0.039 Uiso 1 1 calc R . . 
 C12 C 0.5329(7) 0.2794(4) -0.2801(5) 0.0374(15) Uani 1 1 d . . . 
 H12 H 0.5804 0.3311 -0.2902 0.045 Uiso 1 1 calc R . . 
 C13 C 0.5520(7) 0.2172(6) -0.3455(5) 0.044(2) Uani 1 1 d . . . 
 H13 H 0.6107 0.2265 -0.4016 0.053 Uiso 1 1 calc R . . 
 C14 C 0.4860(8) 0.1401(5) -0.3308(5) 0.0401(15) Uani 1 1 d . . . 
 H14 H 0.5001 0.0969 -0.3763 0.048 Uiso 1 1 calc R . . 
 C15 C 0.4003(7) 0.1277(4) -0.2496(5) 0.0307(12) Uani 1 1 d . . . 
 H15 H 0.3561 0.0754 -0.2388 0.037 Uiso 1 1 calc R . . 
 C16 C 0.2777(6) 0.0671(3) -0.0492(4) 0.0229(10) Uani 1 1 d . . . 
 C17 C 0.1567(7) 0.0143(4) -0.0857(5) 0.0279(11) Uani 1 1 d . . . 
 H17 H 0.0648 0.0359 -0.1203 0.033 Uiso 1 1 calc R . . 
 C18 C 0.1718(7) -0.0701(4) -0.0709(5) 0.0341(13) Uani 1 1 d . . . 
 H18 H 0.0926 -0.1062 -0.0983 0.041 Uiso 1 1 calc R . . 
 C19 C 0.2998(7) -0.1004(4) -0.0175(5) 0.0363(14) Uani 1 1 d . . . 
 H19 H 0.3087 -0.1577 -0.0066 0.044 Uiso 1 1 calc R . . 
 C20 C 0.4155(7) -0.0497(4) 0.0206(5) 0.0363(14) Uani 1 1 d . . . 
 H20 H 0.5029 -0.0720 0.0592 0.044 Uiso 1 1 calc R . . 
 C21 C 0.4080(6) 0.0341(3) 0.0041(4) 0.0264(11) Uani 1 1 d . . . 
 H21 H 0.4915 0.0686 0.0291 0.032 Uiso 1 1 calc R . . 
 C22 C 0.2778(6) 0.1465(4) 0.2055(4) 0.0240(10) Uani 1 1 d . . . 
 C23 C 0.1931(8) 0.0732(4) 0.2094(5) 0.0317(15) Uani 1 1 d . . . 
 H23 H 0.0977 0.0663 0.1694 0.038 Uiso 1 1 calc R . . 
 C24 C 0.2489(8) 0.0103(4) 0.2721(5) 0.0383(15) Uani 1 1 d . . . 
 H24 H 0.1925 -0.0398 0.2741 0.046 Uiso 1 1 calc R . . 
 C25 C 0.3869(8) 0.0212(5) 0.3316(5) 0.0421(16) Uani 1 1 d . . . 
 H25 H 0.4248 -0.0215 0.3747 0.051 Uiso 1 1 calc R . . 
 C26 C 0.4684(8) 0.0929(5) 0.3285(5) 0.0397(15) Uani 1 1 d . . . 
 H26 H 0.5616 0.1000 0.3706 0.048 Uiso 1 1 calc R . . 
 C27 C 0.4182(7) 0.1556(4) 0.2653(5) 0.0319(13) Uani 1 1 d . . . 
 H27 H 0.4784 0.2045 0.2624 0.038 Uiso 1 1 calc R . . 
 C28 C 0.2317(7) 0.3218(4) 0.1909(5) 0.0252(13) Uani 1 1 d . . . 
 C29 C 0.2024(8) 0.3233(4) 0.2880(5) 0.0385(14) Uani 1 1 d . . . 
 H29 H 0.1799 0.2739 0.3211 0.046 Uiso 1 1 calc R . . 
 C30 C 0.2052(10) 0.3978(5) 0.3395(6) 0.0520(19) Uani 1 1 d . . . 
 H30 H 0.1858 0.3989 0.4077 0.062 Uiso 1 1 calc R . . 
 C31 C 0.2363(9) 0.4692(5) 0.2909(6) 0.0503(19) Uani 1 1 d . . . 
 H31 H 0.2382 0.5197 0.3259 0.060 Uiso 1 1 calc R . . 
 C32 C 0.2644(8) 0.4685(4) 0.1929(6) 0.0397(15) Uani 1 1 d . . . 
 H32 H 0.2850 0.5183 0.1600 0.048 Uiso 1 1 calc R . . 
 C33 C 0.2629(7) 0.3948(4) 0.1412(5) 0.0297(12) Uani 1 1 d . . . 
 H33 H 0.2827 0.3939 0.0731 0.036 Uiso 1 1 calc R . . 
 Cl2 Cl 0.1623(2) 0.16428(15) -0.50873(14) 0.0567(5) Uani 1 1 d . . . 
 Cl3 Cl -0.1583(2) 0.10245(19) -0.50456(16) 0.0650(6) Uani 1 1 d . . . 
 C34 C 0.0105(9) 0.1049(6) 0.4312(6) 0.055(2) Uani 1 1 d . . . 
 H34A H -0.0158 0.1277 0.3644 0.066 Uiso 1 1 calc R . . 
 H34B H 0.0492 0.0483 0.4232 0.066 Uiso 1 1 calc R . . 
 O1 O 0.1322(13) -0.0833(8) 0.5261(9) 0.131(4) Uiso 1 1 d . . . 
 C35 C 0.2186(14) -0.0450(8) -0.3846(9) 0.085(3) Uiso 1 1 d . . . 
 H35A H 0.1441 -0.0344 -0.3331 0.103 Uiso 1 1 calc R . . 
 H35B H 0.2649 0.0079 -0.4032 0.103 Uiso 1 1 calc R . . 
 C36 C 0.6472(14) 0.3960(8) 0.3426(9) 0.081(3) Uiso 1 1 d . . . 
 H36A H 0.5431 0.4234 0.3375 0.097 Uiso 1 1 calc R . . 
 H36B H 0.6697 0.3735 0.2772 0.097 Uiso 1 1 calc R . . 
 C37 C 0.6568(19) 0.3299(12) 0.4231(12) 0.127(6) Uiso 1 1 d . . . 
 H37A H 0.6604 0.2744 0.3940 0.152 Uiso 1 1 calc R . . 
 H37B H 0.5662 0.3334 0.4650 0.152 Uiso 1 1 calc R . . 
 C38 C 0.1830(18) -0.1484(11) 0.5160(12) 0.115(5) Uiso 1 1 d . . . 
 H38A H 0.1987 -0.1561 0.4449 0.138 Uiso 1 1 calc R . . 
 H38B H 0.1025 -0.1885 0.5338 0.138 Uiso 1 1 calc R . . 

 loop_ 
  _atom_site_aniso_label 
  _atom_site_aniso_U_11 
  _atom_site_aniso_U_22 
  _atom_site_aniso_U_33 
  _atom_site_aniso_U_23 
  _atom_site_aniso_U_13 
  _atom_site_aniso_U_12 
 Pt1 0.01762(8) 0.01723(8) 0.02666(9) 0.00119(12) 0.00439(5) 0.00045(10) 
 Cl1 0.0153(5) 0.0270(7) 0.0349(7) -0.0003(5) 0.0029(4) -0.0015(5) 
 Br1 0.0324(2) 0.0392(4) 0.0351(3) 0.0041(4) 0.01372(19) 0.0045(3) 
 P1 0.0193(6) 0.0172(6) 0.0233(6) 0.0001(5) 0.0037(5) -0.0006(4) 
 P2 0.0208(6) 0.0166(6) 0.0252(6) -0.0005(4) 0.0040(5) -0.0014(4) 
 N1 0.0180(16) 0.0126(17) 0.036(2) 0.002(3) 0.0055(13) -0.001(3) 
 C1 0.021(2) 0.025(2) 0.025(3) 0.0008(19) 0.0012(18) -0.0023(19) 
 C2 0.022(2) 0.029(3) 0.025(3) 0.002(2) 0.0022(19) 0.004(2) 
 C3 0.032(3) 0.034(5) 0.033(3) -0.003(2) -0.001(2) 0.000(2) 
 C4 0.023(2) 0.024(3) 0.033(3) 0.005(2) -0.001(2) 0.003(2) 
 C5 0.031(3) 0.028(3) 0.030(3) 0.000(2) 0.002(2) 0.006(2) 
 C6 0.035(3) 0.021(3) 0.067(5) -0.001(3) -0.003(3) 0.002(2) 
 C7 0.039(4) 0.026(3) 0.074(5) 0.014(3) 0.009(3) 0.004(3) 
 C8 0.051(4) 0.046(5) 0.073(6) 0.042(4) 0.023(4) 0.009(3) 
 C9 0.042(3) 0.034(3) 0.031(3) 0.007(2) 0.008(2) 0.008(3) 
 C10 0.0140(18) 0.027(4) 0.024(2) 0.002(2) 0.0020(15) 0.003(2) 
 C11 0.033(3) 0.028(3) 0.036(3) 0.004(3) 0.007(2) -0.004(2) 
 C12 0.033(3) 0.040(4) 0.040(4) 0.016(3) 0.009(3) -0.006(3) 
 C13 0.033(3) 0.067(7) 0.034(3) 0.016(3) 0.015(2) -0.001(3) 
 C14 0.041(4) 0.053(4) 0.027(3) -0.003(3) 0.012(3) 0.006(3) 
 C15 0.034(3) 0.029(3) 0.031(3) -0.004(2) 0.012(2) 0.000(2) 
 C16 0.024(2) 0.019(2) 0.026(3) 0.002(2) 0.0088(19) -0.001(2) 
 C17 0.033(3) 0.022(3) 0.029(3) -0.004(2) 0.003(2) -0.004(2) 
 C18 0.031(3) 0.025(3) 0.046(4) -0.003(3) 0.008(3) -0.005(2) 
 C19 0.031(3) 0.021(3) 0.059(4) 0.003(3) 0.016(3) 0.003(2) 
 C20 0.034(3) 0.022(3) 0.054(4) 0.012(3) 0.006(3) 0.006(2) 
 C21 0.020(2) 0.020(3) 0.039(3) 0.004(2) 0.004(2) -0.0037(19) 
 C22 0.025(2) 0.021(2) 0.026(3) -0.001(2) 0.004(2) 0.003(2) 
 C23 0.033(3) 0.024(3) 0.038(4) 0.003(3) 0.002(3) 0.004(3) 
 C24 0.044(4) 0.027(3) 0.044(4) 0.013(3) 0.007(3) 0.006(3) 
 C25 0.049(4) 0.039(4) 0.039(4) 0.013(3) 0.007(3) 0.014(3) 
 C26 0.037(3) 0.043(4) 0.038(4) -0.001(3) -0.004(3) 0.006(3) 
 C27 0.027(3) 0.033(3) 0.035(3) -0.002(2) -0.001(2) 0.001(2) 
 C28 0.020(3) 0.023(3) 0.032(3) -0.005(2) -0.002(2) -0.004(2) 
 C29 0.056(4) 0.029(3) 0.032(3) -0.007(3) 0.012(3) -0.001(3) 
 C30 0.078(5) 0.041(4) 0.039(4) -0.011(3) 0.017(4) 0.002(4) 
 C31 0.064(5) 0.027(3) 0.060(5) -0.015(3) 0.004(4) 0.001(3) 
 C32 0.046(4) 0.022(3) 0.050(4) 0.000(3) -0.002(3) 0.001(3) 
 C33 0.032(3) 0.023(3) 0.034(3) 0.000(2) -0.002(2) -0.003(2) 
 Cl2 0.0499(9) 0.0772(14) 0.0441(10) 0.0041(9) 0.0109(7) -0.0053(9) 
 Cl3 0.0502(11) 0.1024(19) 0.0431(11) -0.0205(11) 0.0068(8) -0.0136(11) 
 C34 0.057(5) 0.071(6) 0.038(4) -0.006(4) 0.012(3) 0.005(4) 

 _geom_special_details 
; 
  All esds (except the esd in the dihedral angle between two l.s. planes) 
  are estimated using the full covariance matrix.  The cell esds are taken 
  into account individually in the estimation of esds in distances, angles 
  and torsion angles; correlations between esds in cell parameters are only 
  used when they are defined by crystal symmetry.  An approximate (isotropic) 
  treatment of cell esds is used for estimating esds involving l.s. planes. 
; 

 loop_ 
  _geom_bond_atom_site_label_1 
  _geom_bond_atom_site_label_2 
  _geom_bond_distance 
  _geom_bond_site_symmetry_2 
  _geom_bond_publ_flag 
 Pt1 N1 2.090(4) . ? 
 Pt1 P2 2.2029(13) . ? 
 Pt1 Cl1 2.3641(12) . ? 
 Pt1 Br1 2.4400(6) . ? 
 P1 N1 1.599(4) . ? 
 P1 C16 1.789(6) . ? 
 P1 C10 1.803(5) . ? 
 P1 C1 1.815(5) . ? 
 P2 C22 1.801(6) . ? 
 P2 C28 1.829(6) . ? 
 P2 C1 1.842(5) . ? 
 N1 C2 1.458(8) . ? 
 C2 C3 1.527(8) . ? 
 C2 C4 1.549(8) . ? 
 C4 C5 1.394(9) . ? 
 C4 C9 1.400(8) . ? 
 C5 C6 1.386(10) . ? 
 C6 C7 1.390(11) . ? 
 C7 C8 1.377(13) . ? 
 C8 C9 1.420(10) . ? 
 C10 C11 1.393(9) . ? 
 C10 C15 1.398(9) . ? 
 C11 C12 1.398(9) . ? 
 C12 C13 1.365(11) . ? 
 C13 C14 1.399(11) . ? 
 C14 C15 1.377(9) . ? 
 C16 C21 1.388(8) . ? 
 C16 C17 1.405(8) . ? 
 C17 C18 1.398(9) . ? 
 C18 C19 1.357(9) . ? 
 C19 C20 1.359(9) . ? 
 C20 C21 1.388(8) . ? 
 C22 C23 1.400(9) . ? 
 C22 C27 1.403(8) . ? 
 C23 C24 1.395(9) . ? 
 C24 C25 1.387(10) . ? 
 C25 C26 1.364(11) . ? 
 C26 C27 1.383(10) . ? 
 C28 C29 1.356(9) . ? 
 C28 C33 1.403(9) . ? 
 C29 C30 1.402(10) . ? 
 C30 C31 1.375(12) . ? 
 C31 C32 1.365(11) . ? 
 C32 C33 1.393(9) . ? 
 Cl2 C34 1.766(9) 1_554 ? 
 Cl3 C34 1.731(8) 1_554 ? 
 C34 Cl3 1.731(8) 1_556 ? 
 C34 Cl2 1.766(9) 1_556 ? 
 O1 C38 1.158(17) . ? 
 O1 C35 1.507(16) 1_556 ? 
 C35 O1 1.507(16) 1_554 ? 
 C35 C36 1.569(16) 2_645 ? 
 C36 C37 1.53(2) . ? 
 C36 C35 1.569(16) 2_655 ? 
 C37 C38 1.58(2) 2_656 ? 
 C38 C37 1.58(2) 2_646 ? 

 loop_ 
  _geom_angle_atom_site_label_1 
  _geom_angle_atom_site_label_2 
  _geom_angle_atom_site_label_3 
  _geom_angle 
  _geom_angle_site_symmetry_1 
  _geom_angle_site_symmetry_3 
  _geom_angle_publ_flag 
 N1 Pt1 P2 89.90(11) . . ? 
 N1 Pt1 Cl1 89.79(12) . . ? 
 P2 Pt1 Cl1 175.28(5) . . ? 
 N1 Pt1 Br1 175.8(2) . . ? 
 P2 Pt1 Br1 91.29(4) . . ? 
 Cl1 Pt1 Br1 89.35(4) . . ? 
 N1 P1 C16 111.5(3) . . ? 
 N1 P1 C10 114.3(2) . . ? 
 C16 P1 C10 107.0(3) . . ? 
 N1 P1 C1 107.8(3) . . ? 
 C16 P1 C1 107.4(3) . . ? 
 C10 P1 C1 108.6(3) . . ? 
 C22 P2 C28 105.8(3) . . ? 
 C22 P2 C1 104.3(2) . . ? 
 C28 P2 C1 106.2(3) . . ? 
 C22 P2 Pt1 114.52(19) . . ? 
 C28 P2 Pt1 117.88(19) . . ? 
 C1 P2 Pt1 107.08(17) . . ? 
 C2 N1 P1 130.0(3) . . ? 
 C2 N1 Pt1 118.3(3) . . ? 
 P1 N1 Pt1 110.6(2) . . ? 
 P1 C1 P2 104.6(3) . . ? 
 N1 C2 C3 111.8(5) . . ? 
 N1 C2 C4 111.8(5) . . ? 
 C3 C2 C4 114.2(5) . . ? 
 C5 C4 C9 120.1(6) . . ? 
 C5 C4 C2 117.4(5) . . ? 
 C9 C4 C2 122.5(5) . . ? 
 C6 C5 C4 121.2(6) . . ? 
 C5 C6 C7 119.1(7) . . ? 
 C8 C7 C6 120.8(7) . . ? 
 C7 C8 C9 120.6(7) . . ? 
 C4 C9 C8 118.2(7) . . ? 
 C11 C10 C15 119.5(5) . . ? 
 C11 C10 P1 120.3(5) . . ? 
 C15 C10 P1 120.2(5) . . ? 
 C10 C11 C12 119.2(6) . . ? 
 C13 C12 C11 120.6(6) . . ? 
 C12 C13 C14 120.7(6) . . ? 
 C15 C14 C13 119.1(7) . . ? 
 C14 C15 C10 120.9(6) . . ? 
 C21 C16 C17 118.8(5) . . ? 
 C21 C16 P1 121.9(4) . . ? 
 C17 C16 P1 119.2(4) . . ? 
 C18 C17 C16 119.8(6) . . ? 
 C19 C18 C17 119.9(6) . . ? 
 C18 C19 C20 120.7(6) . . ? 
 C19 C20 C21 121.1(6) . . ? 
 C20 C21 C16 119.5(5) . . ? 
 C23 C22 C27 119.2(6) . . ? 
 C23 C22 P2 119.7(4) . . ? 
 C27 C22 P2 121.1(5) . . ? 
 C24 C23 C22 120.0(6) . . ? 
 C25 C24 C23 119.8(7) . . ? 
 C26 C25 C24 120.2(6) . . ? 
 C25 C26 C27 121.4(6) . . ? 
 C26 C27 C22 119.5(6) . . ? 
 C29 C28 C33 120.2(6) . . ? 
 C29 C28 P2 119.7(5) . . ? 
 C33 C28 P2 119.7(5) . . ? 
 C28 C29 C30 120.0(7) . . ? 
 C31 C30 C29 119.7(7) . . ? 
 C32 C31 C30 120.8(7) . . ? 
 C31 C32 C33 120.0(7) . . ? 
 C32 C33 C28 119.3(6) . . ? 
 Cl3 C34 Cl2 112.7(5) 1_556 1_556 ? 
 C38 O1 C35 108.1(14) . 1_556 ? 
 O1 C35 C36 109.6(11) 1_554 2_645 ? 
 C37 C36 C35 100.1(11) . 2_655 ? 
 C36 C37 C38 102.3(12) . 2_656 ? 
 O1 C38 C37 117.3(16) . 2_646 ? 

 _diffrn_measured_fraction_theta_max    0.995 
 _diffrn_reflns_theta_full              30.02 
 _diffrn_measured_fraction_theta_full   0.995 
 _refine_diff_density_max    1.405 
 _refine_diff_density_min   -2.506 
 _refine_diff_density_rms    0.157 
#END====
 data_ptiminop 
# compound 6c

_audit_creation_method            SHELXL-97 
_chemical_name_systematic 
; 
 ? 
; 
_chemical_name_common             ? 
_chemical_melting_point           ? 
_chemical_formula_moiety          ? 
_chemical_formula_sum 
 'C64.50 H59 Br Cl6 N2 P4 Pt' 
_chemical_formula_weight          1473.72 
 
loop_ 
 _atom_type_symbol 
 _atom_type_description 
 _atom_type_scat_dispersion_real 
 _atom_type_scat_dispersion_imag 
 _atom_type_scat_source 
 'C'  'C'   0.0033   0.0016 
 'International Tables Vol C Tables 4.2.6.8 and 6.1.1.4' 
 'H'  'H'   0.0000   0.0000 
 'International Tables Vol C Tables 4.2.6.8 and 6.1.1.4' 
 'N'  'N'   0.0061   0.0033 
 'International Tables Vol C Tables 4.2.6.8 and 6.1.1.4' 
 'P'  'P'   0.1023   0.0942 
 'International Tables Vol C Tables 4.2.6.8 and 6.1.1.4' 
 'Cl'  'Cl'   0.1484   0.1585 
 'International Tables Vol C Tables 4.2.6.8 and 6.1.1.4' 
 'Pt'  'Pt'  -1.7033   8.3905 
 'International Tables Vol C Tables 4.2.6.8 and 6.1.1.4' 
 'Br'  'Br'  -0.2901   2.4595 
 'International Tables Vol C Tables 4.2.6.8 and 6.1.1.4' 
 
_symmetry_cell_setting            'Triclinic'
_symmetry_space_group_name_H-M    'P-1     '
 
loop_ 
 _symmetry_equiv_pos_as_xyz 
 'x, y, z' 
 '-x, -y, -z' 
 
_cell_length_a                    12.4100(10) 
_cell_length_b                    12.6440(10) 
_cell_length_c                    21.6810(10) 
_cell_angle_alpha                 75.6000(10) 
_cell_angle_beta                  75.8500(10) 
_cell_angle_gamma                 81.0400(10) 
_cell_volume                      3178.8(4) 
_cell_formula_units_Z             2 
_cell_measurement_temperature     150.0(1)
_cell_measurement_reflns_used     251
_cell_measurement_theta_min       3.0
_cell_measurement_theta_max       20.0
 
_exptl_crystal_description        'block'
_exptl_crystal_colour             'colorless'
_exptl_crystal_size_max           0.20 
_exptl_crystal_size_mid           0.20 
_exptl_crystal_size_min           0.20 
_exptl_crystal_density_meas       ? 
_exptl_crystal_density_diffrn     1.540 
_exptl_crystal_density_method     'not measured' 
_exptl_crystal_F_000              1470 
_exptl_absorpt_coefficient_mu     3.229 
_exptl_absorpt_correction_type    'multi-scan'
_exptl_absorpt_correction_T_min   0.5644 
_exptl_absorpt_correction_T_max   0.5644 
_exptl_absorpt_process_details    ? 
 
_exptl_special_details 
; 
 ? 
; 
 
_diffrn_ambient_temperature       150.0(1)
_diffrn_radiation_wavelength      0.71069 
_diffrn_radiation_type            MoK\a 
_diffrn_radiation_source          'fine-focus sealed tube' 
_diffrn_radiation_monochromator   graphite 
_diffrn_measurement_device_type   'KappaCCD'
_diffrn_measurement_method        'phi and omega scans'
_diffrn_detector_area_resol_mean  ? 
_diffrn_standards_number          ? 
_diffrn_standards_interval_count  ? 
_diffrn_standards_interval_time   ? 
_diffrn_standards_decay_%         ? 
_diffrn_reflns_number             25128 
_diffrn_reflns_av_R_equivalents   0.0209 
_diffrn_reflns_av_sigmaI/netI     0.0525 
_diffrn_reflns_limit_h_min        -17 
_diffrn_reflns_limit_h_max        12 
_diffrn_reflns_limit_k_min        -17 
_diffrn_reflns_limit_k_max        17 
_diffrn_reflns_limit_l_min        -30 
_diffrn_reflns_limit_l_max        29 
_diffrn_reflns_theta_min          2.86 
_diffrn_reflns_theta_max          30.03 
_reflns_number_total              18447 
_reflns_number_gt                 15385 
_reflns_threshold_expression      >2sigma(I) 
 
_computing_data_collection        ? 
_computing_cell_refinement        ? 
_computing_data_reduction         ? 
_computing_structure_solution     'SHELXS-97 (Sheldrick, 1990)' 
_computing_structure_refinement   'SHELXL-97 (Sheldrick, 1997)' 
_computing_molecular_graphics     ? 
_computing_publication_material   ? 
 
_refine_special_details 
; 
 Refinement of F^2^ against ALL reflections.  The weighted R-factor wR and 
 goodness of fit S are based on F^2^, conventional R-factors R are based 
 on F, with F set to zero for negative F^2^. The threshold expression of 
 F^2^ > 2sigma(F^2^) is used only for calculating R-factors(gt) etc. and is 
 not relevant to the choice of reflections for refinement.  R-factors based 
 on F^2^ are statistically about twice as large as those based on F, and R- 
 factors based on ALL data will be even larger. 

 A CH2Cl2 molecule located near a symmetry center could not be properly
 defined and was accounted for using the Platon SQUEEZE function.
; 
 
_refine_ls_structure_factor_coef  Fsqd  
_refine_ls_matrix_type            full 
_refine_ls_weighting_scheme       calc  
_refine_ls_weighting_details 
 'calc w=1/[\s^2^(Fo^2^)+(0.0546P)^2^+0.0000P] where P=(Fo^2^+2Fc^2^)/3' 
_atom_sites_solution_primary      direct 
_atom_sites_solution_secondary    difmap 
_atom_sites_solution_hydrogens    geom 
_refine_ls_hydrogen_treatment     mixed 
_refine_ls_extinction_method      SHELXL 
_refine_ls_extinction_coef        0.00138(18) 
_refine_ls_extinction_expression 
 'Fc^*^=kFc[1+0.001xFc^2^\l^3^/sin(2\q)]^-1/4^' 
_refine_ls_number_reflns          18447 
_refine_ls_number_parameters      722 
_refine_ls_number_restraints      0 
_refine_ls_R_factor_all           0.0486 
_refine_ls_R_factor_gt            0.0379 
_refine_ls_wR_factor_ref          0.1012 
_refine_ls_wR_factor_gt           0.0973 
_refine_ls_goodness_of_fit_ref    1.058 
_refine_ls_restrained_S_all       1.058 
_refine_ls_shift/su_max           0.001 
_refine_ls_shift/su_mean          0.000 
 
loop_ 
 _atom_site_label 
 _atom_site_type_symbol 
 _atom_site_fract_x 
 _atom_site_fract_y 
 _atom_site_fract_z 
 _atom_site_U_iso_or_equiv 
 _atom_site_adp_type 
 _atom_site_occupancy 
 _atom_site_symmetry_multiplicity 
 _atom_site_calc_flag 
 _atom_site_refinement_flags 
 _atom_site_disorder_assembly 
 _atom_site_disorder_group 
Pt1 Pt 0.032429(9) 0.205609(9) 0.735176(5) 0.02126(5) Uani 1 1 d . . . 
Cl1 Cl -0.1967(5) 0.2628(8) 0.9293(4) 0.0364(4) Uani 0.55 1 d P A 1 
Br1 Br -0.17166(17) 0.2693(3) 0.92335(17) 0.0364(4) Uani 0.45 1 d P B 2 
Cl2 Cl 0.2565(15) 0.1314(17) 0.5397(8) 0.0371(4) Uani 0.45 1 d P C 1 
Br2 Br 0.2434(4) 0.1254(5) 0.5457(2) 0.0371(4) Uani 0.55 1 d P D 2 
P1 P -0.08628(6) 0.26980(7) 0.66966(3) 0.02294(15) Uani 1 1 d . . . 
P2 P 0.06280(6) 0.44469(7) 0.63357(4) 0.02379(16) Uani 1 1 d . . . 
P3 P -0.03110(6) 0.04399(7) 0.78496(4) 0.02331(15) Uani 1 1 d . . . 
P4 P 0.14441(7) 0.04940(7) 0.85277(4) 0.02508(16) Uani 1 1 d . . . 
N1 N 0.0911(2) 0.3642(2) 0.69938(11) 0.0221(5) Uani 1 1 d . . . 
N2 N 0.1617(2) 0.1446(2) 0.78685(11) 0.0234(5) Uani 1 1 d . . . 
C1 C -0.0014(3) 0.3583(3) 0.60072(14) 0.0267(6) Uani 1 1 d . . . 
H1A H 0.0567 0.3132 0.5755 0.032 Uiso 1 1 calc R . . 
H1B H -0.0489 0.4040 0.5714 0.032 Uiso 1 1 calc R . . 
C2 C -0.1392(3) 0.1832(3) 0.63091(15) 0.0266(6) Uani 1 1 d . . . 
C3 C -0.2473(3) 0.1536(3) 0.65531(16) 0.0319(7) Uani 1 1 d . . . 
H3 H -0.2918 0.1767 0.6929 0.038 Uiso 1 1 calc R . . 
C4 C -0.2906(3) 0.0907(3) 0.62515(18) 0.0379(8) Uani 1 1 d . . . 
H4 H -0.3643 0.0700 0.6424 0.046 Uiso 1 1 calc R . . 
C5 C -0.2265(3) 0.0574(3) 0.56968(19) 0.0424(9) Uani 1 1 d . . . 
H5 H -0.2563 0.0150 0.5486 0.051 Uiso 1 1 calc R . . 
C6 C -0.1197(3) 0.0866(3) 0.54581(19) 0.0416(9) Uani 1 1 d . . . 
H6 H -0.0762 0.0638 0.5079 0.050 Uiso 1 1 calc R . . 
C7 C -0.0737(3) 0.1486(3) 0.57555(16) 0.0333(7) Uani 1 1 d . . . 
H7 H 0.0008 0.1672 0.5587 0.040 Uiso 1 1 calc R . . 
C8 C -0.2052(2) 0.3592(3) 0.70016(14) 0.0246(6) Uani 1 1 d . . . 
C9 C -0.2690(3) 0.4265(3) 0.65759(16) 0.0345(8) Uani 1 1 d . . . 
H9 H -0.2530 0.4220 0.6131 0.041 Uiso 1 1 calc R . . 
C10 C -0.3558(3) 0.4997(3) 0.68063(19) 0.0431(9) Uani 1 1 d . . . 
H10 H -0.3979 0.5470 0.6516 0.052 Uiso 1 1 calc R . . 
C11 C -0.3810(3) 0.5040(3) 0.74563(19) 0.0440(9) Uani 1 1 d . . . 
H11 H -0.4420 0.5526 0.7616 0.053 Uiso 1 1 calc R . . 
C12 C -0.3180(3) 0.4380(3) 0.78749(17) 0.0412(9) Uani 1 1 d . . . 
H12 H -0.3349 0.4422 0.8320 0.049 Uiso 1 1 calc R . . 
C13 C -0.2294(3) 0.3653(3) 0.76480(15) 0.0309(7) Uani 1 1 d . . . 
H13 H -0.1860 0.3201 0.7937 0.037 Uiso 1 1 calc R . . 
C14 C -0.0339(3) 0.5634(3) 0.64506(14) 0.0282(6) Uani 1 1 d . . . 
C15 C -0.0692(3) 0.6339(3) 0.59128(16) 0.0433(9) Uani 1 1 d . . . 
H15 H -0.0416 0.6187 0.5491 0.052 Uiso 1 1 calc R . . 
C16 C -0.1440(4) 0.7255(3) 0.59881(18) 0.0505(11) Uani 1 1 d . . . 
H16 H -0.1676 0.7731 0.5621 0.061 Uiso 1 1 calc R . . 
C17 C -0.1842(3) 0.7472(3) 0.66001(19) 0.0474(10) Uani 1 1 d . . . 
H17 H -0.2357 0.8098 0.6655 0.057 Uiso 1 1 calc R . . 
C18 C -0.1497(3) 0.6780(3) 0.71347(18) 0.0417(9) Uani 1 1 d . . . 
H18 H -0.1771 0.6942 0.7554 0.050 Uiso 1 1 calc R . . 
C19 C -0.0758(3) 0.5858(3) 0.70674(15) 0.0305(7) Uani 1 1 d . . . 
H19 H -0.0538 0.5379 0.7439 0.037 Uiso 1 1 calc R . . 
C20 C 0.1804(3) 0.4928(3) 0.57139(14) 0.0280(6) Uani 1 1 d . . . 
C21 C 0.2591(3) 0.4137(3) 0.54503(15) 0.0328(7) Uani 1 1 d . . . 
H21 H 0.2469 0.3383 0.5585 0.039 Uiso 1 1 calc R . . 
C22 C 0.3535(3) 0.4461(3) 0.49986(17) 0.0393(8) Uani 1 1 d . . . 
H22 H 0.4067 0.3927 0.4824 0.047 Uiso 1 1 calc R . . 
C23 C 0.3717(3) 0.5561(4) 0.47959(16) 0.0425(9) Uani 1 1 d . . . 
H23 H 0.4373 0.5777 0.4484 0.051 Uiso 1 1 calc R . . 
C24 C 0.2948(3) 0.6341(3) 0.50466(17) 0.0422(9) Uani 1 1 d . . . 
H24 H 0.3070 0.7094 0.4903 0.051 Uiso 1 1 calc R . . 
C25 C 0.1998(3) 0.6028(3) 0.55081(16) 0.0339(7) Uani 1 1 d . . . 
H25 H 0.1476 0.6568 0.5685 0.041 Uiso 1 1 calc R . . 
C26 C 0.1419(3) 0.4059(2) 0.74042(14) 0.0248(6) Uani 1 1 d . . . 
C27 C 0.0916(3) 0.3916(3) 0.80700(15) 0.0305(7) Uani 1 1 d . . . 
H27 H 0.0241 0.3577 0.8237 0.037 Uiso 1 1 calc R . . 
C28 C 0.1406(3) 0.4270(3) 0.84836(16) 0.0376(8) Uani 1 1 d . . . 
H28 H 0.1069 0.4161 0.8935 0.045 Uiso 1 1 calc R . . 
C29 C 0.2376(3) 0.4778(3) 0.82479(19) 0.0435(9) Uani 1 1 d . . . 
H29 H 0.2710 0.5011 0.8536 0.052 Uiso 1 1 calc R . . 
C30 C 0.2863(3) 0.4947(3) 0.75866(19) 0.0401(8) Uani 1 1 d . . . 
H30 H 0.3518 0.5317 0.7419 0.048 Uiso 1 1 calc R . . 
C31 C 0.2388(3) 0.4571(3) 0.71667(17) 0.0313(7) Uani 1 1 d . . . 
H31 H 0.2735 0.4669 0.6717 0.038 Uiso 1 1 calc R . . 
C32 C -0.1782(3) 0.0247(3) 0.80082(14) 0.0260(6) Uani 1 1 d . . . 
C33 C -0.2578(3) 0.0886(3) 0.83718(15) 0.0319(7) Uani 1 1 d . . . 
H33 H -0.2349 0.1405 0.8551 0.038 Uiso 1 1 calc R . . 
C34 C -0.3690(3) 0.0767(3) 0.84718(17) 0.0382(8) Uani 1 1 d . . . 
H34 H -0.4229 0.1218 0.8712 0.046 Uiso 1 1 calc R . . 
C35 C -0.4039(3) -0.0007(3) 0.82254(18) 0.0426(9) Uani 1 1 d . . . 
H35 H -0.4812 -0.0077 0.8291 0.051 Uiso 1 1 calc R . . 
C36 C -0.3257(3) -0.0668(3) 0.78869(19) 0.0418(9) Uani 1 1 d . . . 
H36 H -0.3491 -0.1219 0.7735 0.050 Uiso 1 1 calc R . . 
C37 C -0.2128(3) -0.0540(3) 0.77642(17) 0.0352(7) Uani 1 1 d . . . 
H37 H -0.1593 -0.0983 0.7516 0.042 Uiso 1 1 calc R . . 
C38 C 0.0427(2) -0.0701(3) 0.75054(15) 0.0265(6) Uani 1 1 d . . . 
C39 C 0.0413(3) -0.1773(3) 0.78779(16) 0.0330(7) Uani 1 1 d . . . 
H39 H 0.0030 -0.1912 0.8322 0.040 Uiso 1 1 calc R . . 
C40 C 0.0959(3) -0.2632(3) 0.75961(19) 0.0399(8) Uani 1 1 d . . . 
H40 H 0.0946 -0.3366 0.7843 0.048 Uiso 1 1 calc R . . 
C41 C 0.1531(3) -0.2411(3) 0.69429(19) 0.0426(9) Uani 1 1 d . . . 
H41 H 0.1912 -0.3000 0.6749 0.051 Uiso 1 1 calc R . . 
C42 C 0.1548(3) -0.1362(3) 0.65815(18) 0.0399(8) Uani 1 1 d . . . 
H42 H 0.1936 -0.1224 0.6138 0.048 Uiso 1 1 calc R . . 
C43 C 0.0997(3) -0.0491(3) 0.68610(15) 0.0316(7) Uani 1 1 d . . . 
H43 H 0.1012 0.0241 0.6611 0.038 Uiso 1 1 calc R . . 
C44 C 0.0006(2) 0.0256(3) 0.86566(14) 0.0261(6) Uani 1 1 d . . . 
H44A H -0.0486 0.0783 0.8898 0.031 Uiso 1 1 calc R . . 
H44B H -0.0113 -0.0498 0.8914 0.031 Uiso 1 1 calc R . . 
C45 C 0.2291(3) -0.0781(3) 0.84617(15) 0.0288(6) Uani 1 1 d . . . 
C46 C 0.2182(3) -0.1659(3) 0.90154(17) 0.0369(8) Uani 1 1 d . . . 
H46 H 0.1679 -0.1566 0.9410 0.044 Uiso 1 1 calc R . . 
C47 C 0.2808(3) -0.2650(3) 0.89798(19) 0.0452(9) Uani 1 1 d . . . 
H47 H 0.2729 -0.3243 0.9351 0.054 Uiso 1 1 calc R . . 
C48 C 0.3544(3) -0.2790(3) 0.8414(2) 0.0460(9) Uani 1 1 d . . . 
H48 H 0.3988 -0.3471 0.8399 0.055 Uiso 1 1 calc R . . 
C49 C 0.3644(3) -0.1950(3) 0.7867(2) 0.0451(9) Uani 1 1 d . . . 
H49 H 0.4136 -0.2061 0.7472 0.054 Uiso 1 1 calc R . . 
C50 C 0.3022(3) -0.0929(3) 0.78908(17) 0.0355(7) Uani 1 1 d . . . 
H50 H 0.3103 -0.0343 0.7516 0.043 Uiso 1 1 calc R . . 
C51 C 0.1668(3) 0.0846(3) 0.92393(15) 0.0306(7) Uani 1 1 d . . . 
C52 C 0.2601(3) 0.0387(3) 0.95025(16) 0.0384(8) Uani 1 1 d . . . 
H52 H 0.3096 -0.0176 0.9333 0.046 Uiso 1 1 calc R . . 
C53 C 0.2804(4) 0.0753(4) 1.00106(18) 0.0468(10) Uani 1 1 d . . . 
H53 H 0.3446 0.0448 1.0183 0.056 Uiso 1 1 calc R . . 
C54 C 0.2079(4) 0.1561(4) 1.02695(17) 0.0460(10) Uani 1 1 d . . . 
H54 H 0.2223 0.1807 1.0619 0.055 Uiso 1 1 calc R . . 
C55 C 0.1145(4) 0.2007(3) 1.00183(16) 0.0436(9) Uani 1 1 d . . . 
H55 H 0.0643 0.2556 1.0198 0.052 Uiso 1 1 calc R . . 
C56 C 0.0935(3) 0.1654(3) 0.95008(15) 0.0355(8) Uani 1 1 d . . . 
H56 H 0.0295 0.1965 0.9328 0.043 Uiso 1 1 calc R . . 
C57 C 0.2708(2) 0.1801(3) 0.75600(15) 0.0257(6) Uani 1 1 d . . . 
C58 C 0.3373(3) 0.2138(3) 0.79005(16) 0.0293(7) Uani 1 1 d . . . 
H58 H 0.3126 0.2099 0.8356 0.035 Uiso 1 1 calc R . . 
C59 C 0.4394(3) 0.2529(3) 0.75706(17) 0.0373(8) Uani 1 1 d . . . 
H59 H 0.4846 0.2751 0.7802 0.045 Uiso 1 1 calc R . . 
C60 C 0.4751(3) 0.2594(3) 0.69126(18) 0.0405(8) Uani 1 1 d . . . 
H60 H 0.5437 0.2885 0.6689 0.049 Uiso 1 1 calc R . . 
C61 C 0.4114(3) 0.2235(3) 0.65689(18) 0.0386(8) Uani 1 1 d . . . 
H61 H 0.4371 0.2266 0.6115 0.046 Uiso 1 1 calc R . . 
C62 C 0.3102(3) 0.1833(3) 0.68991(15) 0.0301(7) Uani 1 1 d . . . 
H62 H 0.2673 0.1576 0.6669 0.036 Uiso 1 1 calc R . . 
C63 C 0.5241(4) 0.1211(5) 0.4369(2) 0.0687(14) Uani 1 1 d . . . 
H63A H 0.5887 0.0724 0.4505 0.082 Uiso 0.610(16) 1 calc PR E 1 
H63B H 0.4617 0.1208 0.4754 0.082 Uiso 0.610(16) 1 calc PR E 1 
H63C H 0.4513 0.1241 0.4682 0.082 Uiso 0.390(16) 1 calc PR E 2 
H63D H 0.5751 0.0673 0.4607 0.082 Uiso 0.390(16) 1 calc PR E 2 
Cl3 Cl 0.4847(8) 0.0807(9) 0.3766(4) 0.142(3) Uani 0.610(16) 1 d P E 1 
Cl4 Cl 0.5617(4) 0.2599(3) 0.39931(16) 0.0568(11) Uani 0.610(16) 1 d P E 1 
Cl5 Cl 0.5034(8) 0.0604(5) 0.3821(4) 0.071(2) Uani 0.390(16) 1 d P E 2 
Cl6 Cl 0.5686(7) 0.2366(16) 0.4277(14) 0.175(6) Uani 0.390(16) 1 d P E 2 
C64 C -0.4659(6) 0.3017(7) 0.9757(3) 0.109(2) Uani 1 1 d . . . 
H64A H -0.3893 0.2885 0.9500 0.130 Uiso 1 1 calc R . . 
H64B H -0.4677 0.3637 0.9963 0.130 Uiso 1 1 calc R . . 
Cl7 Cl -0.56055(12) 0.33532(16) 0.92382(7) 0.0917(5) Uani 1 1 d . . . 
Cl8 Cl -0.5005(3) 0.8136(3) 0.96505(18) 0.231(2) Uani 1 1 d . . . 
 
loop_ 
 _atom_site_aniso_label 
 _atom_site_aniso_U_11 
 _atom_site_aniso_U_22 
 _atom_site_aniso_U_33 
 _atom_site_aniso_U_23 
 _atom_site_aniso_U_13 
 _atom_site_aniso_U_12 
Pt1 0.02365(7) 0.01994(7) 0.02118(6) -0.00428(4) -0.00688(4) -0.00223(4) 
Cl1 0.0347(12) 0.0436(6) 0.0301(7) -0.0080(5) -0.0067(9) -0.0023(10) 
Br1 0.0347(12) 0.0436(6) 0.0301(7) -0.0080(5) -0.0067(9) -0.0023(10) 
Cl2 0.0481(14) 0.0392(8) 0.0248(10) -0.0057(7) -0.0062(8) -0.0118(8) 
Br2 0.0481(14) 0.0392(8) 0.0248(10) -0.0057(7) -0.0062(8) -0.0118(8) 
P1 0.0248(4) 0.0238(4) 0.0217(3) -0.0062(3) -0.0074(3) -0.0014(3) 
P2 0.0284(4) 0.0212(4) 0.0213(3) -0.0041(3) -0.0060(3) -0.0010(3) 
P3 0.0256(4) 0.0199(4) 0.0250(3) -0.0043(3) -0.0066(3) -0.0032(3) 
P4 0.0293(4) 0.0232(4) 0.0234(3) -0.0026(3) -0.0094(3) -0.0029(3) 
N1 0.0278(12) 0.0141(12) 0.0254(11) -0.0026(9) -0.0079(10) -0.0047(9) 
N2 0.0240(12) 0.0222(14) 0.0246(11) -0.0021(10) -0.0101(10) -0.0018(10) 
C1 0.0334(16) 0.0262(17) 0.0224(13) -0.0070(12) -0.0093(12) -0.0010(13) 
C2 0.0278(15) 0.0249(17) 0.0310(15) -0.0090(12) -0.0126(12) 0.0004(12) 
C3 0.0320(17) 0.0337(19) 0.0334(16) -0.0102(14) -0.0090(13) -0.0057(14) 
C4 0.0376(18) 0.038(2) 0.0449(19) -0.0127(16) -0.0152(15) -0.0078(15) 
C5 0.055(2) 0.031(2) 0.051(2) -0.0178(17) -0.0244(18) 0.0007(17) 
C6 0.042(2) 0.043(2) 0.050(2) -0.0293(18) -0.0175(17) 0.0093(17) 
C7 0.0307(16) 0.036(2) 0.0369(17) -0.0174(15) -0.0080(13) 0.0004(14) 
C8 0.0232(14) 0.0236(16) 0.0279(14) -0.0086(12) -0.0050(11) -0.0006(12) 
C9 0.0308(17) 0.042(2) 0.0339(16) -0.0139(15) -0.0136(13) 0.0056(15) 
C10 0.0347(19) 0.044(2) 0.052(2) -0.0145(18) -0.0173(16) 0.0101(16) 
C11 0.0339(19) 0.043(2) 0.055(2) -0.0208(19) -0.0052(16) 0.0079(16) 
C12 0.043(2) 0.045(2) 0.0324(17) -0.0149(16) 0.0022(15) -0.0022(17) 
C13 0.0327(17) 0.0298(18) 0.0303(15) -0.0089(13) -0.0053(13) -0.0017(14) 
C14 0.0328(16) 0.0247(17) 0.0250(14) -0.0030(12) -0.0077(12) 0.0014(13) 
C15 0.058(2) 0.039(2) 0.0277(16) -0.0047(15) -0.0132(16) 0.0123(18) 
C16 0.065(3) 0.040(2) 0.0379(19) 0.0003(17) -0.0170(18) 0.017(2) 
C17 0.054(2) 0.031(2) 0.051(2) -0.0118(17) -0.0089(18) 0.0144(18) 
C18 0.051(2) 0.037(2) 0.0370(18) -0.0143(16) -0.0062(16) 0.0029(17) 
C19 0.0364(17) 0.0276(18) 0.0279(15) -0.0069(13) -0.0080(13) -0.0015(13) 
C20 0.0340(16) 0.0280(17) 0.0226(13) -0.0051(12) -0.0066(12) -0.0046(13) 
C21 0.0339(17) 0.0311(19) 0.0327(16) -0.0056(14) -0.0077(13) -0.0030(14) 
C22 0.0288(17) 0.049(2) 0.0362(18) -0.0066(16) -0.0051(14) -0.0005(16) 
C23 0.0344(19) 0.062(3) 0.0291(16) 0.0032(16) -0.0073(14) -0.0187(18) 
C24 0.051(2) 0.040(2) 0.0357(18) 0.0082(16) -0.0170(16) -0.0191(18) 
C25 0.0417(19) 0.0288(19) 0.0321(16) -0.0048(14) -0.0101(14) -0.0058(15) 
C26 0.0315(15) 0.0184(15) 0.0266(14) -0.0057(11) -0.0119(12) 0.0015(12) 
C27 0.0400(18) 0.0245(17) 0.0278(15) -0.0033(12) -0.0122(13) -0.0018(14) 
C28 0.060(2) 0.0267(19) 0.0294(16) -0.0082(14) -0.0174(16) 0.0006(16) 
C29 0.065(3) 0.0245(19) 0.054(2) -0.0086(16) -0.039(2) -0.0012(17) 
C30 0.043(2) 0.0278(19) 0.057(2) -0.0056(16) -0.0258(17) -0.0053(15) 
C31 0.0349(17) 0.0233(17) 0.0379(17) -0.0019(13) -0.0164(14) -0.0037(13) 
C32 0.0290(15) 0.0208(16) 0.0275(14) -0.0035(12) -0.0061(12) -0.0035(12) 
C33 0.0324(17) 0.0338(19) 0.0292(15) -0.0058(13) -0.0068(13) -0.0047(14) 
C34 0.0349(18) 0.039(2) 0.0350(17) -0.0057(15) -0.0033(14) 0.0029(15) 
C35 0.0306(18) 0.045(2) 0.049(2) -0.0031(18) -0.0093(15) -0.0072(16) 
C36 0.0361(19) 0.038(2) 0.058(2) -0.0141(18) -0.0120(17) -0.0129(16) 
C37 0.0311(17) 0.032(2) 0.0468(19) -0.0130(16) -0.0098(14) -0.0052(14) 
C38 0.0254(14) 0.0219(16) 0.0337(15) -0.0086(12) -0.0081(12) -0.0001(12) 
C39 0.0345(17) 0.0288(18) 0.0352(16) -0.0075(14) -0.0060(13) -0.0036(14) 
C40 0.042(2) 0.0233(18) 0.054(2) -0.0064(16) -0.0130(17) -0.0010(15) 
C41 0.048(2) 0.027(2) 0.055(2) -0.0183(17) -0.0128(18) 0.0062(16) 
C42 0.044(2) 0.035(2) 0.0373(18) -0.0112(16) -0.0039(15) 0.0024(16) 
C43 0.0349(17) 0.0291(18) 0.0303(15) -0.0072(13) -0.0085(13) 0.0013(14) 
C44 0.0289(15) 0.0266(17) 0.0228(13) -0.0033(12) -0.0056(11) -0.0060(12) 
C45 0.0311(16) 0.0244(17) 0.0322(15) -0.0036(13) -0.0130(13) -0.0009(13) 
C46 0.0423(19) 0.0291(19) 0.0367(17) -0.0006(14) -0.0113(15) -0.0016(15) 
C47 0.056(2) 0.029(2) 0.050(2) 0.0011(16) -0.0237(18) -0.0022(17) 
C48 0.046(2) 0.028(2) 0.064(3) -0.0121(18) -0.0164(19) 0.0048(16) 
C49 0.043(2) 0.035(2) 0.053(2) -0.0111(18) -0.0056(17) 0.0016(17) 
C50 0.0370(18) 0.0279(19) 0.0419(18) -0.0056(15) -0.0106(15) -0.0042(14) 
C51 0.0387(18) 0.0282(18) 0.0266(14) -0.0015(13) -0.0104(13) -0.0100(14) 
C52 0.049(2) 0.037(2) 0.0337(17) -0.0022(15) -0.0179(15) -0.0095(16) 
C53 0.060(3) 0.047(3) 0.0395(19) 0.0021(17) -0.0288(18) -0.013(2) 
C54 0.067(3) 0.049(3) 0.0277(16) -0.0008(16) -0.0143(17) -0.029(2) 
C55 0.066(3) 0.039(2) 0.0291(16) -0.0080(15) -0.0075(16) -0.0172(19) 
C56 0.047(2) 0.033(2) 0.0262(15) -0.0031(13) -0.0081(14) -0.0102(15) 
C57 0.0237(14) 0.0186(15) 0.0342(15) -0.0016(12) -0.0113(12) 0.0008(11) 
C58 0.0286(16) 0.0253(17) 0.0359(16) -0.0023(13) -0.0156(13) -0.0021(13) 
C59 0.0339(18) 0.0299(19) 0.050(2) 0.0005(15) -0.0204(15) -0.0071(14) 
C60 0.0251(16) 0.038(2) 0.052(2) 0.0018(17) -0.0073(15) -0.0061(15) 
C61 0.0332(18) 0.035(2) 0.0397(18) -0.0017(15) -0.0029(14) 0.0021(15) 
C62 0.0298(16) 0.0279(18) 0.0307(15) -0.0037(13) -0.0070(12) -0.0004(13) 
C63 0.068(3) 0.074(4) 0.069(3) -0.025(3) -0.022(3) 0.002(3) 
Cl3 0.127(4) 0.247(8) 0.087(3) -0.060(4) 0.005(3) -0.128(5) 
Cl4 0.0515(15) 0.0438(17) 0.077(2) -0.0278(17) 0.0002(11) -0.0105(10) 
Cl5 0.097(4) 0.051(3) 0.072(3) -0.038(2) 0.011(3) -0.036(2) 
Cl6 0.053(3) 0.199(10) 0.346(16) -0.220(11) -0.023(7) -0.005(5) 
C64 0.084(4) 0.133(7) 0.105(5) -0.002(5) -0.033(4) -0.021(4) 
Cl7 0.0669(8) 0.1298(15) 0.0695(8) -0.0128(9) -0.0099(7) -0.0059(9) 
Cl8 0.173(3) 0.273(4) 0.243(3) 0.112(3) -0.140(3) -0.130(3) 
 
_geom_special_details 
; 
 All esds (except the esd in the dihedral angle between two l.s. planes) 
 are estimated using the full covariance matrix.  The cell esds are taken 
 into account individually in the estimation of esds in distances, angles 
 and torsion angles; correlations between esds in cell parameters are only 
 used when they are defined by crystal symmetry.  An approximate (isotropic) 
 treatment of cell esds is used for estimating esds involving l.s. planes. 
; 
 
loop_ 
 _geom_bond_atom_site_label_1 
 _geom_bond_atom_site_label_2 
 _geom_bond_distance 
 _geom_bond_site_symmetry_2 
 _geom_bond_publ_flag 
Pt1 N2 2.118(2) . ? 
Pt1 N1 2.135(2) . ? 
Pt1 P1 2.2191(7) . ? 
Pt1 P3 2.2251(8) . ? 
P1 C8 1.807(3) . ? 
P1 C2 1.812(3) . ? 
P1 C1 1.834(3) . ? 
P2 N1 1.614(2) . ? 
P2 C20 1.795(3) . ? 
P2 C14 1.798(3) . ? 
P2 C1 1.808(3) . ? 
P3 C38 1.807(3) . ? 
P3 C32 1.817(3) . ? 
P3 C44 1.837(3) . ? 
P4 N2 1.616(3) . ? 
P4 C44 1.799(3) . ? 
P4 C45 1.799(3) . ? 
P4 C51 1.801(3) . ? 
N1 C26 1.442(4) . ? 
N2 C57 1.443(4) . ? 
C2 C3 1.390(5) . ? 
C2 C7 1.402(4) . ? 
C3 C4 1.383(5) . ? 
C4 C5 1.391(5) . ? 
C5 C6 1.371(6) . ? 
C6 C7 1.389(5) . ? 
C8 C13 1.379(4) . ? 
C8 C9 1.400(4) . ? 
C9 C10 1.386(4) . ? 
C10 C11 1.380(5) . ? 
C11 C12 1.378(5) . ? 
C12 C13 1.393(5) . ? 
C14 C19 1.393(4) . ? 
C14 C15 1.399(4) . ? 
C15 C16 1.384(5) . ? 
C16 C17 1.378(5) . ? 
C17 C18 1.383(5) . ? 
C18 C19 1.382(5) . ? 
C20 C25 1.391(5) . ? 
C20 C21 1.410(4) . ? 
C21 C22 1.374(5) . ? 
C22 C23 1.388(6) . ? 
C23 C24 1.377(6) . ? 
C24 C25 1.386(5) . ? 
C26 C31 1.379(5) . ? 
C26 C27 1.404(4) . ? 
C27 C28 1.388(4) . ? 
C28 C29 1.378(6) . ? 
C29 C30 1.390(5) . ? 
C30 C31 1.402(5) . ? 
C32 C33 1.392(4) . ? 
C32 C37 1.400(4) . ? 
C33 C34 1.371(5) . ? 
C34 C35 1.392(5) . ? 
C35 C36 1.373(5) . ? 
C36 C37 1.389(5) . ? 
C38 C43 1.383(4) . ? 
C38 C39 1.395(5) . ? 
C39 C40 1.382(5) . ? 
C40 C41 1.401(5) . ? 
C41 C42 1.363(5) . ? 
C42 C43 1.393(5) . ? 
C45 C50 1.380(5) . ? 
C45 C46 1.413(5) . ? 
C46 C47 1.376(5) . ? 
C47 C48 1.372(6) . ? 
C48 C49 1.375(6) . ? 
C49 C50 1.403(5) . ? 
C51 C56 1.392(5) . ? 
C51 C52 1.397(5) . ? 
C52 C53 1.384(5) . ? 
C53 C54 1.385(6) . ? 
C54 C55 1.382(6) . ? 
C55 C56 1.397(5) . ? 
C57 C62 1.389(4) . ? 
C57 C58 1.403(4) . ? 
C58 C59 1.392(5) . ? 
C59 C60 1.372(5) . ? 
C60 C61 1.398(5) . ? 
C61 C62 1.388(5) . ? 
C63 Cl6 1.591(14) . ? 
C63 Cl5 1.652(9) . ? 
C63 Cl3 1.712(8) . ? 
C63 Cl4 1.822(7) . ? 
C64 Cl8 1.716(8) 2_467 ? 
C64 Cl7 1.755(6) . ? 
Cl8 C64 1.715(8) 2_467 ? 
 
loop_ 
 _geom_angle_atom_site_label_1 
 _geom_angle_atom_site_label_2 
 _geom_angle_atom_site_label_3 
 _geom_angle 
 _geom_angle_site_symmetry_1 
 _geom_angle_site_symmetry_3 
 _geom_angle_publ_flag 
N2 Pt1 N1 92.93(10) . . ? 
N2 Pt1 P1 172.76(7) . . ? 
N1 Pt1 P1 84.55(7) . . ? 
N2 Pt1 P3 83.47(7) . . ? 
N1 Pt1 P3 172.80(6) . . ? 
P1 Pt1 P3 99.75(3) . . ? 
C8 P1 C2 106.09(14) . . ? 
C8 P1 C1 105.33(15) . . ? 
C2 P1 C1 103.19(14) . . ? 
C8 P1 Pt1 115.30(10) . . ? 
C2 P1 Pt1 122.95(10) . . ? 
C1 P1 Pt1 101.79(10) . . ? 
N1 P2 C20 116.15(14) . . ? 
N1 P2 C14 115.49(13) . . ? 
C20 P2 C14 106.70(15) . . ? 
N1 P2 C1 103.16(14) . . ? 
C20 P2 C1 106.52(14) . . ? 
C14 P2 C1 108.20(15) . . ? 
C38 P3 C32 105.35(14) . . ? 
C38 P3 C44 107.44(14) . . ? 
C32 P3 C44 105.32(14) . . ? 
C38 P3 Pt1 114.75(11) . . ? 
C32 P3 Pt1 121.83(11) . . ? 
C44 P3 Pt1 100.89(11) . . ? 
N2 P4 C44 103.12(13) . . ? 
N2 P4 C45 114.65(14) . . ? 
C44 P4 C45 107.95(16) . . ? 
N2 P4 C51 115.53(15) . . ? 
C44 P4 C51 109.36(15) . . ? 
C45 P4 C51 105.97(15) . . ? 
C26 N1 P2 119.4(2) . . ? 
C26 N1 Pt1 118.39(18) . . ? 
P2 N1 Pt1 121.53(13) . . ? 
C57 N2 P4 120.61(19) . . ? 
C57 N2 Pt1 117.03(18) . . ? 
P4 N2 Pt1 121.78(14) . . ? 
P2 C1 P1 107.55(14) . . ? 
C3 C2 C7 119.7(3) . . ? 
C3 C2 P1 119.4(2) . . ? 
C7 C2 P1 120.9(2) . . ? 
C4 C3 C2 120.4(3) . . ? 
C3 C4 C5 120.2(3) . . ? 
C6 C5 C4 119.3(3) . . ? 
C5 C6 C7 121.8(3) . . ? 
C6 C7 C2 118.7(3) . . ? 
C13 C8 C9 119.9(3) . . ? 
C13 C8 P1 119.9(2) . . ? 
C9 C8 P1 120.1(2) . . ? 
C10 C9 C8 119.7(3) . . ? 
C11 C10 C9 120.1(3) . . ? 
C12 C11 C10 120.2(3) . . ? 
C11 C12 C13 120.3(3) . . ? 
C8 C13 C12 119.7(3) . . ? 
C19 C14 C15 119.2(3) . . ? 
C19 C14 P2 121.3(2) . . ? 
C15 C14 P2 119.5(2) . . ? 
C16 C15 C14 120.7(3) . . ? 
C17 C16 C15 119.5(3) . . ? 
C16 C17 C18 120.2(3) . . ? 
C19 C18 C17 120.9(3) . . ? 
C18 C19 C14 119.5(3) . . ? 
C25 C20 C21 119.1(3) . . ? 
C25 C20 P2 123.1(2) . . ? 
C21 C20 P2 117.7(3) . . ? 
C22 C21 C20 119.8(3) . . ? 
C21 C22 C23 120.5(3) . . ? 
C24 C23 C22 120.1(3) . . ? 
C23 C24 C25 120.2(4) . . ? 
C24 C25 C20 120.3(3) . . ? 
C31 C26 C27 119.4(3) . . ? 
C31 C26 N1 122.2(3) . . ? 
C27 C26 N1 118.4(3) . . ? 
C28 C27 C26 119.9(3) . . ? 
C29 C28 C27 120.9(3) . . ? 
C28 C29 C30 119.5(3) . . ? 
C29 C30 C31 120.1(4) . . ? 
C26 C31 C30 120.2(3) . . ? 
C33 C32 C37 119.3(3) . . ? 
C33 C32 P3 120.2(2) . . ? 
C37 C32 P3 120.5(2) . . ? 
C34 C33 C32 120.2(3) . . ? 
C33 C34 C35 120.7(3) . . ? 
C36 C35 C34 119.5(3) . . ? 
C35 C36 C37 120.7(3) . . ? 
C36 C37 C32 119.5(3) . . ? 
C43 C38 C39 120.5(3) . . ? 
C43 C38 P3 118.6(2) . . ? 
C39 C38 P3 120.9(2) . . ? 
C40 C39 C38 119.5(3) . . ? 
C39 C40 C41 119.5(4) . . ? 
C42 C41 C40 120.8(3) . . ? 
C41 C42 C43 120.1(3) . . ? 
C38 C43 C42 119.5(3) . . ? 
P4 C44 P3 107.25(15) . . ? 
C50 C45 C46 119.5(3) . . ? 
C50 C45 P4 122.3(3) . . ? 
C46 C45 P4 118.2(2) . . ? 
C47 C46 C45 119.7(3) . . ? 
C48 C47 C46 120.6(4) . . ? 
C47 C48 C49 120.4(4) . . ? 
C48 C49 C50 120.2(4) . . ? 
C45 C50 C49 119.6(3) . . ? 
C56 C51 C52 119.5(3) . . ? 
C56 C51 P4 118.8(2) . . ? 
C52 C51 P4 121.5(3) . . ? 
C53 C52 C51 119.9(4) . . ? 
C52 C53 C54 120.6(4) . . ? 
C55 C54 C53 119.8(3) . . ? 
C54 C55 C56 120.3(4) . . ? 
C51 C56 C55 119.9(3) . . ? 
C62 C57 C58 119.0(3) . . ? 
C62 C57 N2 118.6(3) . . ? 
C58 C57 N2 122.3(3) . . ? 
C59 C58 C57 119.9(3) . . ? 
C60 C59 C58 120.3(3) . . ? 
C59 C60 C61 120.6(3) . . ? 
C62 C61 C60 119.1(3) . . ? 
C61 C62 C57 121.0(3) . . ? 
Cl6 C63 Cl5 130.1(12) . . ? 
Cl6 C63 Cl3 123.8(13) . . ? 
Cl5 C63 Cl3 11.3(6) . . ? 
Cl6 C63 Cl4 19.9(10) . . ? 
Cl5 C63 Cl4 110.9(4) . . ? 
Cl3 C63 Cl4 103.9(5) . . ? 
Cl8 C64 Cl7 110.4(4) 2_467 . ? 
 
_diffrn_measured_fraction_theta_max    0.991 
_diffrn_reflns_theta_full              30.03 
_diffrn_measured_fraction_theta_full   0.991 
_refine_diff_density_max    1.985 
_refine_diff_density_min   -1.871 
_refine_diff_density_rms    0.118 
#END====
data_niiminop 
# compound 7a
 
_audit_creation_method            SHELXL-97 
_chemical_name_systematic 
; 
 ? 
; 
_chemical_name_common             ? 
_chemical_melting_point           ? 
_chemical_formula_moiety          ? 
_chemical_formula_sum 
 'C37 H39 Br2 N Ni O2 P2' 
_chemical_formula_weight          810.16 
 
loop_ 
 _atom_type_symbol 
 _atom_type_description 
 _atom_type_scat_dispersion_real 
 _atom_type_scat_dispersion_imag 
 _atom_type_scat_source 
 'C'  'C'   0.0033   0.0016 
 'International Tables Vol C Tables 4.2.6.8 and 6.1.1.4' 
 'H'  'H'   0.0000   0.0000 
 'International Tables Vol C Tables 4.2.6.8 and 6.1.1.4' 
 'Br'  'Br'  -0.2901   2.4595 
 'International Tables Vol C Tables 4.2.6.8 and 6.1.1.4' 
 'N'  'N'   0.0061   0.0033 
 'International Tables Vol C Tables 4.2.6.8 and 6.1.1.4' 
 'Ni'  'Ni'   0.3393   1.1124 
 'International Tables Vol C Tables 4.2.6.8 and 6.1.1.4' 
 'O'  'O'   0.0106   0.0060 
 'International Tables Vol C Tables 4.2.6.8 and 6.1.1.4' 
 'P'  'P'   0.1023   0.0942 
 'International Tables Vol C Tables 4.2.6.8 and 6.1.1.4' 
 
_symmetry_cell_setting            'Monoclinic'
_symmetry_space_group_name_H-M    'P21/c     '
 
loop_ 
 _symmetry_equiv_pos_as_xyz 
 'x, y, z' 
 '-x, y+1/2, -z+1/2' 
 '-x, -y, -z' 
 'x, -y-1/2, z-1/2' 
 
_cell_length_a                    19.9970(10) 
_cell_length_b                    9.7900(10) 
_cell_length_c                    17.6700(10) 
_cell_angle_alpha                 90.00 
_cell_angle_beta                  95.4000(10) 
_cell_angle_gamma                 90.00 
_cell_volume                      3443.9(4) 
_cell_formula_units_Z             4 
_cell_measurement_temperature     150.0(1)
_cell_measurement_reflns_used     251
_cell_measurement_theta_min       3.0
_cell_measurement_theta_max       20.0
 
_exptl_crystal_description        'plate'
_exptl_crystal_colour             'blue'
_exptl_crystal_size_max           0.22 
_exptl_crystal_size_mid           0.18 
_exptl_crystal_size_min           0.03 
_exptl_crystal_density_meas       ? 
_exptl_crystal_density_diffrn     1.563 
_exptl_crystal_density_method     'not measured' 
_exptl_crystal_F_000              1648 
_exptl_absorpt_coefficient_mu     3.011 
_exptl_absorpt_correction_type    'multi-scan'
_exptl_absorpt_correction_T_min   0.5571 
_exptl_absorpt_correction_T_max   0.9151 
_exptl_absorpt_process_details    ? 
 
_exptl_special_details 
; 
 ? 
; 
 
_diffrn_ambient_temperature       150.0(1)
_diffrn_radiation_wavelength      0.71069 
_diffrn_radiation_type            MoK\a 
_diffrn_radiation_source          'fine-focus sealed tube' 
_diffrn_radiation_monochromator   graphite 
_diffrn_measurement_device_type   'KappaCCD'
_diffrn_measurement_method        'phi and omega scans'
_diffrn_detector_area_resol_mean  ? 
_diffrn_standards_number          ? 
_diffrn_standards_interval_count  ? 
_diffrn_standards_interval_time   ? 
_diffrn_standards_decay_%         ? 
_diffrn_reflns_number             14102 
_diffrn_reflns_av_R_equivalents   0.0264 
_diffrn_reflns_av_sigmaI/netI     0.0517 
_diffrn_reflns_limit_h_min        -25 
_diffrn_reflns_limit_h_max        25 
_diffrn_reflns_limit_k_min        -10 
_diffrn_reflns_limit_k_max        12 
_diffrn_reflns_limit_l_min        -22 
_diffrn_reflns_limit_l_max        22 
_diffrn_reflns_theta_min          2.92 
_diffrn_reflns_theta_max          27.47 
_reflns_number_total              7871 
_reflns_number_gt                 5916 
_reflns_threshold_expression      >2sigma(I) 
 
_computing_data_collection        ? 
_computing_cell_refinement        ? 
_computing_data_reduction         ? 
_computing_structure_solution     'SHELXS-97 (Sheldrick, 1990)' 
_computing_structure_refinement   'SHELXL-97 (Sheldrick, 1997)' 
_computing_molecular_graphics     ? 
_computing_publication_material   ? 
 
_refine_special_details 
; 
 Refinement of F^2^ against ALL reflections.  The weighted R-factor wR and 
 goodness of fit S are based on F^2^, conventional R-factors R are based 
 on F, with F set to zero for negative F^2^. The threshold expression of 
 F^2^ > 2sigma(F^2^) is used only for calculating R-factors(gt) etc. and is 
 not relevant to the choice of reflections for refinement.  R-factors based 
 on F^2^ are statistically about twice as large as those based on F, and R- 
 factors based on ALL data will be even larger. 
; 
 
_refine_ls_structure_factor_coef  Fsqd  
_refine_ls_matrix_type            full 
_refine_ls_weighting_scheme       calc  
_refine_ls_weighting_details 
 'calc w=1/[\s^2^(Fo^2^)+(0.0425P)^2^+0.1060P] where P=(Fo^2^+2Fc^2^)/3' 
_atom_sites_solution_primary      direct 
_atom_sites_solution_secondary    difmap 
_atom_sites_solution_hydrogens    geom 
_refine_ls_hydrogen_treatment     mixed 
_refine_ls_extinction_method      none 
_refine_ls_extinction_coef        ? 
_refine_ls_number_reflns          7871 
_refine_ls_number_parameters      407 
_refine_ls_number_restraints      0 
_refine_ls_R_factor_all           0.0542 
_refine_ls_R_factor_gt            0.0350 
_refine_ls_wR_factor_ref          0.0903 
_refine_ls_wR_factor_gt           0.0843 
_refine_ls_goodness_of_fit_ref    1.039 
_refine_ls_restrained_S_all       1.039 
_refine_ls_shift/su_max           0.001 
_refine_ls_shift/su_mean          0.000 
 
loop_ 
 _atom_site_label 
 _atom_site_type_symbol 
 _atom_site_fract_x 
 _atom_site_fract_y 
 _atom_site_fract_z 
 _atom_site_U_iso_or_equiv 
 _atom_site_adp_type 
 _atom_site_occupancy 
 _atom_site_symmetry_multiplicity 
 _atom_site_calc_flag 
 _atom_site_refinement_flags 
 _atom_site_disorder_assembly 
 _atom_site_disorder_group 
Br1 Br 0.155768(15) 0.09552(3) 0.305558(16) 0.03189(9) Uani 1 1 d . . . 
Br2 Br 0.352937(16) 0.04580(3) 0.404625(17) 0.03591(9) Uani 1 1 d . . . 
Ni1 Ni 0.259717(18) -0.02295(3) 0.322078(18) 0.02259(9) Uani 1 1 d . . . 
P1 P 0.20898(3) -0.31774(6) 0.27961(4) 0.01891(15) Uani 1 1 d . . . 
P2 P 0.26624(4) -0.08676(6) 0.19766(4) 0.02074(15) Uani 1 1 d . . . 
O1 O 0.01825(11) -0.11950(19) 0.58355(11) 0.0366(5) Uani 1 1 d . . . 
N1 N 0.23796(11) -0.21572(19) 0.34513(11) 0.0208(5) Uani 1 1 d . . . 
C1 C 0.19943(14) -0.2162(2) 0.19375(13) 0.0214(6) Uani 1 1 d . . . 
H1A H 0.1549 -0.1710 0.1890 0.026 Uiso 1 1 calc R . . 
H1B H 0.2022 -0.2757 0.1488 0.026 Uiso 1 1 calc R . . 
C2 C 0.24332(15) -0.2624(3) 0.42565(14) 0.0260(6) Uani 1 1 d . . . 
H2A H 0.2849 -0.2244 0.4524 0.031 Uiso 1 1 calc R . . 
H2B H 0.2473 -0.3632 0.4267 0.031 Uiso 1 1 calc R . . 
C3 C 0.18402(14) -0.2208(2) 0.46848(14) 0.0234(6) Uani 1 1 d . . . 
C4 C 0.13391(15) -0.3137(3) 0.48135(14) 0.0275(6) Uani 1 1 d . . . 
H4 H 0.1371 -0.4046 0.4632 0.033 Uiso 1 1 calc R . . 
C5 C 0.07972(15) -0.2780(3) 0.51969(14) 0.0292(7) Uani 1 1 d . . . 
H5 H 0.0460 -0.3436 0.5273 0.035 Uiso 1 1 calc R . . 
C6 C 0.07434(15) -0.1455(3) 0.54728(14) 0.0262(6) Uani 1 1 d . . . 
C7 C 0.12368(15) -0.0508(3) 0.53532(15) 0.0256(6) Uani 1 1 d . . . 
H7 H 0.1204 0.0399 0.5537 0.031 Uiso 1 1 calc R . . 
C8 C 0.17823(15) -0.0888(3) 0.49621(14) 0.0264(6) Uani 1 1 d . . . 
H8 H 0.2120 -0.0234 0.4884 0.032 Uiso 1 1 calc R . . 
C9 C 0.01258(17) 0.0112(3) 0.61737(17) 0.0372(7) Uani 1 1 d . . . 
H9A H 0.0499 0.0245 0.6568 0.056 Uiso 1 1 calc R . . 
H9B H -0.0301 0.0170 0.6403 0.056 Uiso 1 1 calc R . . 
H9C H 0.0140 0.0821 0.5784 0.056 Uiso 1 1 calc R . . 
C10 C 0.26246(13) -0.4605(2) 0.26260(14) 0.0203(5) Uani 1 1 d . . . 
C11 C 0.24586(15) -0.5444(3) 0.19961(16) 0.0280(6) Uani 1 1 d . . . 
H11 H 0.2069 -0.5256 0.1662 0.034 Uiso 1 1 calc R . . 
C12 C 0.28631(16) -0.6550(3) 0.18597(17) 0.0334(7) Uani 1 1 d . . . 
H12 H 0.2762 -0.7094 0.1419 0.040 Uiso 1 1 calc R . . 
C13 C 0.34119(16) -0.6864(3) 0.23612(17) 0.0358(7) Uani 1 1 d . . . 
H13 H 0.3675 -0.7649 0.2279 0.043 Uiso 1 1 calc R . . 
C14 C 0.35779(16) -0.6034(3) 0.29834(18) 0.0371(7) Uani 1 1 d . . . 
H14 H 0.3958 -0.6243 0.3327 0.045 Uiso 1 1 calc R . . 
C15 C 0.31886(15) -0.4894(3) 0.31051(16) 0.0296(6) Uani 1 1 d . . . 
H15 H 0.3313 -0.4309 0.3524 0.036 Uiso 1 1 calc R . . 
C16 C 0.12833(14) -0.3918(2) 0.29373(14) 0.0206(5) Uani 1 1 d . . . 
C17 C 0.07242(14) -0.3057(3) 0.29265(14) 0.0253(6) Uani 1 1 d . . . 
H17 H 0.0767 -0.2118 0.2806 0.030 Uiso 1 1 calc R . . 
C18 C 0.01099(15) -0.3568(3) 0.30900(15) 0.0290(6) Uani 1 1 d . . . 
H18 H -0.0273 -0.2990 0.3065 0.035 Uiso 1 1 calc R . . 
C19 C 0.00559(15) -0.4937(3) 0.32916(16) 0.0293(6) Uani 1 1 d . . . 
H19 H -0.0365 -0.5286 0.3412 0.035 Uiso 1 1 calc R . . 
C20 C 0.06043(14) -0.5790(3) 0.33180(15) 0.0274(6) Uani 1 1 d . . . 
H20 H 0.0564 -0.6720 0.3461 0.033 Uiso 1 1 calc R . . 
C21 C 0.12168(14) -0.5285(2) 0.31353(14) 0.0242(6) Uani 1 1 d . . . 
H21 H 0.1594 -0.5876 0.3145 0.029 Uiso 1 1 calc R . . 
C22 C 0.24269(15) 0.0180(2) 0.11393(14) 0.0256(6) Uani 1 1 d . . . 
C23 C 0.28919(18) 0.0471(3) 0.06162(15) 0.0341(7) Uani 1 1 d . . . 
H23 H 0.3329 0.0084 0.0676 0.041 Uiso 1 1 calc R . . 
C24 C 0.2704(2) 0.1336(3) 0.00072(17) 0.0464(10) Uani 1 1 d . . . 
H24 H 0.3018 0.1541 -0.0349 0.056 Uiso 1 1 calc R . . 
C25 C 0.2070(2) 0.1898(3) -0.00866(17) 0.0508(10) Uani 1 1 d . . . 
H25 H 0.1948 0.2479 -0.0508 0.061 Uiso 1 1 calc R . . 
C26 C 0.16122(19) 0.1621(3) 0.04289(18) 0.0438(9) Uani 1 1 d . . . 
H26 H 0.1175 0.2010 0.0365 0.053 Uiso 1 1 calc R . . 
C27 C 0.17940(16) 0.0766(3) 0.10458(16) 0.0314(7) Uani 1 1 d . . . 
H27 H 0.1481 0.0585 0.1405 0.038 Uiso 1 1 calc R . . 
C28 C 0.34126(13) -0.1795(2) 0.17906(14) 0.0231(6) Uani 1 1 d . . . 
C29 C 0.40044(15) -0.1541(3) 0.22486(16) 0.0318(7) Uani 1 1 d . . . 
H29 H 0.4013 -0.0875 0.2640 0.038 Uiso 1 1 calc R . . 
C30 C 0.45841(16) -0.2266(3) 0.21308(17) 0.0406(8) Uani 1 1 d . . . 
H30 H 0.4988 -0.2093 0.2443 0.049 Uiso 1 1 calc R . . 
C31 C 0.45744(17) -0.3234(3) 0.15639(18) 0.0406(8) Uani 1 1 d . . . 
H31 H 0.4971 -0.3728 0.1487 0.049 Uiso 1 1 calc R . . 
C32 C 0.39895(17) -0.3488(3) 0.11084(18) 0.0391(8) Uani 1 1 d . . . 
H32 H 0.3985 -0.4154 0.0717 0.047 Uiso 1 1 calc R . . 
C33 C 0.34092(15) -0.2775(3) 0.12203(15) 0.0299(6) Uani 1 1 d . . . 
H33 H 0.3007 -0.2956 0.0906 0.036 Uiso 1 1 calc R . . 
O2 O 0.44162(15) -0.8481(3) 0.12223(18) 0.0811(9) Uani 1 1 d . . . 
C34 C 0.4388(3) -0.7234(5) 0.0807(3) 0.114(2) Uani 1 1 d . . . 
H34A H 0.3955 -0.7177 0.0487 0.137 Uiso 1 1 calc R . . 
H34B H 0.4412 -0.6455 0.1165 0.137 Uiso 1 1 calc R . . 
C35 C 0.4904(2) -0.7153(5) 0.0357(3) 0.0894(16) Uani 1 1 d . . . 
H35A H 0.5081 -0.6208 0.0356 0.107 Uiso 1 1 calc R . . 
H35B H 0.4747 -0.7410 -0.0172 0.107 Uiso 1 1 calc R . . 
C36 C 0.54426(19) -0.8119(4) 0.0675(2) 0.0612(10) Uani 1 1 d . . . 
H36A H 0.5785 -0.7646 0.1022 0.073 Uiso 1 1 calc R . . 
H36B H 0.5665 -0.8575 0.0267 0.073 Uiso 1 1 calc R . . 
C37 C 0.5038(2) -0.9126(3) 0.1102(2) 0.0598(11) Uani 1 1 d . . . 
H37A H 0.4955 -0.9972 0.0801 0.072 Uiso 1 1 calc R . . 
H37B H 0.5286 -0.9368 0.1595 0.072 Uiso 1 1 calc R . . 
 
loop_ 
 _atom_site_aniso_label 
 _atom_site_aniso_U_11 
 _atom_site_aniso_U_22 
 _atom_site_aniso_U_33 
 _atom_site_aniso_U_23 
 _atom_site_aniso_U_13 
 _atom_site_aniso_U_12 
Br1 0.03218(18) 0.02849(16) 0.03456(17) -0.00370(11) 0.00077(13) 0.00768(12) 
Br2 0.03508(19) 0.03791(17) 0.03281(17) -0.00494(12) -0.00694(13) -0.00673(13) 
Ni1 0.0266(2) 0.01999(17) 0.02091(18) -0.00196(12) 0.00095(15) -0.00110(14) 
P1 0.0211(4) 0.0174(3) 0.0182(3) 0.0005(2) 0.0012(3) 0.0002(3) 
P2 0.0239(4) 0.0202(3) 0.0181(3) 0.0010(2) 0.0020(3) -0.0018(3) 
O1 0.0366(13) 0.0378(11) 0.0370(12) -0.0040(9) 0.0123(10) 0.0002(9) 
N1 0.0266(13) 0.0194(10) 0.0165(11) 0.0000(8) 0.0018(9) 0.0006(9) 
C1 0.0246(15) 0.0203(12) 0.0192(13) 0.0016(9) 0.0020(11) 0.0024(11) 
C2 0.0333(17) 0.0256(13) 0.0190(13) 0.0010(10) 0.0018(12) 0.0046(12) 
C3 0.0304(16) 0.0238(13) 0.0159(13) 0.0021(9) 0.0010(11) 0.0028(11) 
C4 0.0428(19) 0.0212(13) 0.0186(13) 0.0004(10) 0.0026(13) -0.0002(12) 
C5 0.0375(19) 0.0271(14) 0.0231(14) 0.0031(11) 0.0029(13) -0.0054(12) 
C6 0.0297(17) 0.0316(15) 0.0173(13) 0.0011(10) 0.0024(12) 0.0038(12) 
C7 0.0322(17) 0.0218(13) 0.0228(14) 0.0003(10) 0.0021(12) 0.0043(12) 
C8 0.0323(17) 0.0253(14) 0.0218(14) 0.0011(10) 0.0032(12) -0.0032(12) 
C9 0.039(2) 0.0432(17) 0.0303(16) -0.0048(13) 0.0074(14) 0.0085(14) 
C10 0.0203(15) 0.0187(12) 0.0225(14) 0.0012(9) 0.0058(11) -0.0007(10) 
C11 0.0283(17) 0.0239(14) 0.0313(16) -0.0046(11) 0.0001(13) 0.0003(12) 
C12 0.0367(19) 0.0255(14) 0.0391(17) -0.0107(12) 0.0104(14) -0.0031(13) 
C13 0.0334(19) 0.0262(15) 0.0493(19) -0.0024(13) 0.0109(15) 0.0069(13) 
C14 0.0274(18) 0.0392(17) 0.0439(19) -0.0016(13) -0.0009(14) 0.0093(14) 
C15 0.0271(17) 0.0309(15) 0.0305(15) -0.0037(11) 0.0008(13) 0.0019(12) 
C16 0.0219(15) 0.0225(13) 0.0176(13) 0.0006(9) 0.0027(11) 0.0003(11) 
C17 0.0280(16) 0.0225(13) 0.0253(14) 0.0004(10) 0.0019(12) -0.0004(12) 
C18 0.0254(16) 0.0301(15) 0.0324(16) -0.0007(12) 0.0063(13) 0.0034(12) 
C19 0.0248(16) 0.0337(15) 0.0305(16) -0.0002(11) 0.0075(13) -0.0060(12) 
C20 0.0303(17) 0.0226(13) 0.0299(15) -0.0003(11) 0.0057(13) -0.0056(12) 
C21 0.0246(16) 0.0247(13) 0.0232(14) -0.0013(10) 0.0026(12) -0.0004(11) 
C22 0.0415(19) 0.0155(12) 0.0192(13) -0.0023(9) -0.0001(12) -0.0035(12) 
C23 0.057(2) 0.0228(14) 0.0249(15) -0.0015(11) 0.0132(15) -0.0026(13) 
C24 0.093(3) 0.0225(15) 0.0251(16) -0.0014(12) 0.0154(17) -0.0100(17) 
C25 0.103(3) 0.0212(15) 0.0248(17) 0.0026(12) -0.0133(19) -0.0055(19) 
C26 0.064(2) 0.0222(14) 0.0406(19) 0.0025(13) -0.0207(18) 0.0017(15) 
C27 0.0390(19) 0.0228(14) 0.0304(16) 0.0025(11) -0.0072(14) -0.0072(13) 
C28 0.0238(15) 0.0248(13) 0.0213(14) 0.0039(10) 0.0059(12) -0.0038(11) 
C29 0.0285(17) 0.0394(16) 0.0279(15) -0.0014(12) 0.0043(13) -0.0025(13) 
C30 0.0243(18) 0.058(2) 0.0400(19) 0.0023(15) 0.0050(14) 0.0016(15) 
C31 0.0342(19) 0.0454(18) 0.0441(19) 0.0040(14) 0.0127(16) 0.0095(15) 
C32 0.040(2) 0.0384(17) 0.0404(18) -0.0055(13) 0.0138(16) 0.0046(15) 
C33 0.0301(17) 0.0334(15) 0.0268(15) -0.0028(11) 0.0061(13) -0.0018(13) 
O2 0.0565(19) 0.0705(18) 0.118(3) 0.0471(17) 0.0172(18) 0.0060(15) 
C34 0.074(4) 0.118(4) 0.158(5) 0.102(4) 0.048(4) 0.038(3) 
C35 0.055(3) 0.098(3) 0.118(4) 0.067(3) 0.026(3) 0.025(3) 
C36 0.047(3) 0.070(3) 0.066(3) 0.007(2) 0.005(2) 0.015(2) 
C37 0.067(3) 0.0350(19) 0.076(3) 0.0044(17) -0.002(2) 0.0092(18) 
 
_geom_special_details 
; 
 All esds (except the esd in the dihedral angle between two l.s. planes) 
 are estimated using the full covariance matrix.  The cell esds are taken 
 into account individually in the estimation of esds in distances, angles 
 and torsion angles; correlations between esds in cell parameters are only 
 used when they are defined by crystal symmetry.  An approximate (isotropic) 
 treatment of cell esds is used for estimating esds involving l.s. planes. 
; 
 
loop_ 
 _geom_bond_atom_site_label_1 
 _geom_bond_atom_site_label_2 
 _geom_bond_distance 
 _geom_bond_site_symmetry_2 
 _geom_bond_publ_flag 
Br1 Ni1 2.3743(5) . ? 
Br2 Ni1 2.3545(4) . ? 
Ni1 N1 1.9874(19) . ? 
Ni1 P2 2.3010(7) . ? 
P1 N1 1.596(2) . ? 
P1 C10 1.802(2) . ? 
P1 C16 1.807(3) . ? 
P1 C1 1.809(2) . ? 
P2 C28 1.810(3) . ? 
P2 C22 1.825(3) . ? 
P2 C1 1.838(3) . ? 
O1 C6 1.367(3) . ? 
O1 C9 1.421(3) . ? 
N1 C2 1.488(3) . ? 
C2 C3 1.521(4) . ? 
C3 C4 1.388(4) . ? 
C3 C8 1.391(4) . ? 
C4 C5 1.376(4) . ? 
C5 C6 1.393(4) . ? 
C6 C7 1.385(4) . ? 
C7 C8 1.396(4) . ? 
C10 C15 1.374(4) . ? 
C10 C11 1.398(4) . ? 
C11 C12 1.386(4) . ? 
C12 C13 1.379(4) . ? 
C13 C14 1.382(4) . ? 
C14 C15 1.389(4) . ? 
C16 C21 1.392(3) . ? 
C16 C17 1.399(4) . ? 
C17 C18 1.382(4) . ? 
C18 C19 1.394(4) . ? 
C19 C20 1.375(4) . ? 
C20 C21 1.387(4) . ? 
C22 C27 1.385(4) . ? 
C22 C23 1.401(4) . ? 
C23 C24 1.392(4) . ? 
C24 C25 1.379(5) . ? 
C25 C26 1.378(5) . ? 
C26 C27 1.395(4) . ? 
C28 C33 1.391(4) . ? 
C28 C29 1.392(4) . ? 
C29 C30 1.392(4) . ? 
C30 C31 1.378(4) . ? 
C31 C32 1.379(4) . ? 
C32 C33 1.384(4) . ? 
O2 C34 1.423(5) . ? 
O2 C37 1.429(5) . ? 
C34 C35 1.364(6) . ? 
C35 C36 1.502(5) . ? 
C36 C37 1.519(5) . ? 
 
loop_ 
 _geom_angle_atom_site_label_1 
 _geom_angle_atom_site_label_2 
 _geom_angle_atom_site_label_3 
 _geom_angle 
 _geom_angle_site_symmetry_1 
 _geom_angle_site_symmetry_3 
 _geom_angle_publ_flag 
N1 Ni1 P2 88.35(6) . . ? 
N1 Ni1 Br2 108.68(6) . . ? 
P2 Ni1 Br2 123.83(2) . . ? 
N1 Ni1 Br1 106.44(7) . . ? 
P2 Ni1 Br1 98.21(2) . . ? 
Br2 Ni1 Br1 124.714(17) . . ? 
N1 P1 C10 115.19(12) . . ? 
N1 P1 C16 114.76(11) . . ? 
C10 P1 C16 105.26(11) . . ? 
N1 P1 C1 105.49(11) . . ? 
C10 P1 C1 107.68(12) . . ? 
C16 P1 C1 108.13(12) . . ? 
C28 P2 C22 106.85(12) . . ? 
C28 P2 C1 105.03(11) . . ? 
C22 P2 C1 103.04(12) . . ? 
C28 P2 Ni1 115.61(9) . . ? 
C22 P2 Ni1 126.05(8) . . ? 
C1 P2 Ni1 96.70(8) . . ? 
C6 O1 C9 117.8(2) . . ? 
C2 N1 P1 119.33(17) . . ? 
C2 N1 Ni1 119.33(15) . . ? 
P1 N1 Ni1 121.13(11) . . ? 
P1 C1 P2 109.17(13) . . ? 
N1 C2 C3 113.8(2) . . ? 
C4 C3 C8 117.8(3) . . ? 
C4 C3 C2 121.0(2) . . ? 
C8 C3 C2 121.2(2) . . ? 
C5 C4 C3 121.9(2) . . ? 
C4 C5 C6 120.0(3) . . ? 
O1 C6 C7 125.1(2) . . ? 
O1 C6 C5 115.6(2) . . ? 
C7 C6 C5 119.4(3) . . ? 
C6 C7 C8 119.9(2) . . ? 
C3 C8 C7 121.2(3) . . ? 
C15 C10 C11 119.3(2) . . ? 
C15 C10 P1 121.49(19) . . ? 
C11 C10 P1 119.2(2) . . ? 
C12 C11 C10 119.9(3) . . ? 
C13 C12 C11 120.3(3) . . ? 
C12 C13 C14 119.8(3) . . ? 
C13 C14 C15 120.0(3) . . ? 
C10 C15 C14 120.6(3) . . ? 
C21 C16 C17 119.2(2) . . ? 
C21 C16 P1 121.9(2) . . ? 
C17 C16 P1 118.62(18) . . ? 
C18 C17 C16 120.3(2) . . ? 
C17 C18 C19 119.6(3) . . ? 
C20 C19 C18 120.8(3) . . ? 
C19 C20 C21 119.6(2) . . ? 
C20 C21 C16 120.6(3) . . ? 
C27 C22 C23 119.5(3) . . ? 
C27 C22 P2 119.5(2) . . ? 
C23 C22 P2 120.8(2) . . ? 
C24 C23 C22 119.1(3) . . ? 
C25 C24 C23 120.9(3) . . ? 
C26 C25 C24 120.2(3) . . ? 
C25 C26 C27 119.6(3) . . ? 
C22 C27 C26 120.6(3) . . ? 
C33 C28 C29 119.4(3) . . ? 
C33 C28 P2 122.0(2) . . ? 
C29 C28 P2 118.6(2) . . ? 
C30 C29 C28 119.8(3) . . ? 
C31 C30 C29 120.3(3) . . ? 
C30 C31 C32 120.1(3) . . ? 
C31 C32 C33 120.2(3) . . ? 
C32 C33 C28 120.3(3) . . ? 
C34 O2 C37 107.2(3) . . ? 
C35 C34 O2 110.8(4) . . ? 
C34 C35 C36 107.5(4) . . ? 
C35 C36 C37 101.4(3) . . ? 
O2 C37 C36 107.4(3) . . ? 
 
_diffrn_measured_fraction_theta_max    0.997 
_diffrn_reflns_theta_full              27.47 
_diffrn_measured_fraction_theta_full   0.997 
_refine_diff_density_max    0.907 
_refine_diff_density_min   -0.669 
_refine_diff_density_rms    0.079 
#END====
